# Supplementary material for: Chiral phosphoric acid-catalyzed enantioselective synthesis of functionalized pyrrolinones containing a geminal diamine core via an aza-Friedel–Crafts reaction of newly developed pyrrolinone ketimines
Source: Royal Society of Chemistry journal article supplement (doi:10.1039/d3qo01909h), 2024-01-01
Supplement: d3qo01909h1.pdf [file d3qo01909h1.pdf]

# Supporting Information

## Chiral phosphoric acid catalyzed enantioselective synthesis of functionalized pyrrolinones containing a geminal diamine core via aza-Friedel-Crafts reaction of newly developed pyrrolinone ketimines

Tong Zhang,<sup>a</sup> Zhen-Hua Wang,<sup>a\*</sup> Yong Li,<sup>b</sup> Jian-Qiang Zhao,<sup>a</sup> Yong You,<sup>a</sup> Yan-Ping Zhang,<sup>a</sup> Jun-Qing Yin,<sup>a</sup> and Wei-Cheng Yuan<sup>a\*</sup>

---

<sup>a</sup>Innovation Research Center of Chiral Drugs, Institute for Advanced Study, Chengdu University, Chengdu 610106, China

<sup>b</sup>College of Pharmacy, National & Local Joint Engineering Research Center of Targeted and Innovative Therapeutics, IATTI, Chongqing University of Arts and Sciences, Chongqing 402160, China

wangzhenhua@cdu.edu.cn

yuanwc@cioc.ac.cn

### Table of Contents

|     |                                                                                                   |     |
|-----|---------------------------------------------------------------------------------------------------|-----|
| 1 . | General experimental information .....                                                            | S1  |
| 2 . | General experimental procedure for the synthesis of pyrrolinone ketimines <b>1</b> .....          | S1  |
| 3.  | General experimental procedure for the asymmetric synthesis of compounds <b>3</b> .....           | S6  |
| 4.  | Scale-up experiment.....                                                                          | S19 |
| 5.  | Procedure for the synthesis of product <b>4</b> .....                                             | S20 |
| 6.  | Procedure for the synthesis of product <b>5</b> .....                                             | S20 |
| 7.  | Procedure for the synthesis of product <b>6</b> .....                                             | S21 |
| 8.  | Crystal data .....                                                                                | S23 |
| 9.  | <sup>1</sup> H, <sup>13</sup> C NMR spectra for pyrrolinone ketimines .....                       | S25 |
| 10. | <sup>1</sup> H, <sup>13</sup> C NMR, and HPLC spectra for compounds <b>3</b> and <b>4-6</b> ..... | S39 |

## 1. General experimental information

Reagents were purchased from commercial sources and were used as received unless mentioned otherwise. Flash column chromatography was performed over silica gel (H, purchased from Qingdao Ocean Chemical Co., Ltd. Qingdao, China). Analytical thin layer chromatography (TLC) was performed on silica gel HSGF254 glass plates (purchased from Yantai Xinuo Chemical Co., Ltd. Yantai, China) containing a 254 nm fluorescent indicator. The enantiomeric excesses were determined by chiral HPLC analysis that was performed by Agilent HPLC systems using chiral columns described below in detail. Optical rotations were measured with a polarimeter.  $^1\text{H}$  NMR spectra were measured on a Bruker AVANCE NEO 400 MHz spectrometer at the ambient temperature of 400 MHz. Proton chemical shifts are reported in parts per million ( $\delta$  scale) and referenced using tetramethylsilane (TMS) as an internal standard or residual protium in the NMR solvent [ $\text{CDCl}_3$ :  $\delta$  7.26 ( $\text{CHCl}_3$ ) or  $\text{DMSO-}d_6$ :  $\delta$  2.50 ( $\text{CD}_2\text{HSOCD}_3$ )]. Data are reported as follows: chemical shift [multi-plicity (s = singlet, d = doublet, t = triplet, q = quartet, m = multiplet, dd = doublet of doublets, td = triplet of doublets, brs = broad singlet), coupling constant(s) (Hz), integration].  $^{13}\text{C}$  NMR spectra were also measured on a Bruker AVANCE NEO 400 MHz spectrometer at the ambient temperature of  $^{13}\text{C}$  at 101MHz. Carbon chemical shifts are reported in parts per million ( $\delta$  scale), and referenced using the carbon resonances of the solvent [ $\delta$  77.16 ( $\text{CDCl}_3$ ) or  $\delta$  39.52 ( $\text{DMSO-}d_6$ )]. The melting points of products were recorded on a Büchi Melting Point B-545 and temperatures were not corrected. High-resolution mass spectra (HRMS) were recorded by Agilent 6545 LC/Q-TOF mass spectrometer by using an electrospray ionization (ESI) ionization source analyzed by quadrupole time-of-flight (Q-TOF). It should be particularly noted that, in most of the  $^1\text{H}$  NMR spectra, partial protons such as BocN-H, O-H, and PhCH-H appear incompletely. This may be due to a certain degree of steric hindrance resulting from the attachment of the 1-naphthol group to the chiral tetra-substituted carbon, which restricts the fast free rotation of the C-C bond.

## 2. General experimental procedure for the synthesis of pyrrolinone ketimines **1**

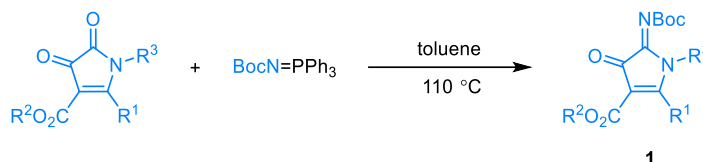

The 1*H*-pyrrole-2,3-diones (1.0 equiv),  $\text{BocN=PPh}_3$  (1.2 equiv) in a flask, and toluene (0.5 M) was added at room temperature. The mixture was stirred at 110 °C for 5 h. After the removal of solvent under reduced pressure, the crude product was purified by column chromatography on silica gel with ethyl acetate/petroleum ether as the eluent to give the pyrrolinone ketimines **1**.

### Ethyl 1-benzyl-5-((*tert*-butoxycarbonyl)imino)-4-oxo-2-phenyl-4,5-dihydro-1*H*-pyrrole-3-carboxylate (**1a**)

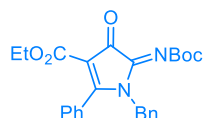

Yellow solid, m.p. 137.2 – 138.1 °C

$^1\text{H}$  NMR (400 MHz,  $\text{CDCl}_3$ )  $\delta$  major isomer: 7.58 – 7.51 (m, 1H), 7.47 – 7.41 (m, 2H), 7.23 – 7.18 (m, 5H), 6.90 (dd,  $J = 7.0, 2.5$  Hz, 2H), 4.71 (s, 2H), 4.06 (q,  $J = 7.1$  Hz, 2H), 1.63 (s, 9H), 1.05 (t,  $J = 7.1$  Hz, 3H).

$^{13}\text{C}$  NMR (101 MHz,  $\text{CDCl}_3$ )  $\delta$  major isomer: 179.4, 174.1, 161.1, 158.5, 146.3, 135.5, 131.4, 128.8, 128.5, 128.1, 127.8, 127.5, 104.5, 83.7, 60.2, 46.2, 28.1, 14.1.

HRMS (ESI)  $m/z$   $[\text{M}+\text{Na}]^+$  Calcd. for  $\text{C}_{25}\text{H}_{26}\text{N}_2\text{O}_5\text{Na}$ : 457.1734; found: 457.1744.

**Ethyl 1-benzyl-5-((tert-butoxycarbonyl)imino)-4-oxo-2-(p-tolyl)-4,5-dihydro-1H-pyrrole-3-carboxylate (1b)**

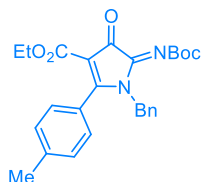

Yellow solid, m.p. 154.8 – 155.2 °C

$^1\text{H}$  NMR (400 MHz,  $\text{CDCl}_3$ )  $\delta$  7.29 – 7.20 (m, 5H), 7.12 (d,  $J = 8.2$  Hz, 2H), 7.00 – 6.88 (m, 2H), 4.72 (s, 2H), 4.09 (q,  $J = 7.1$  Hz, 2H), 2.42 (s, 3H), 1.62 (s, 9H), 1.11 (t,  $J = 7.1$  Hz, 3H).

$^{13}\text{C}$  NMR (101 MHz,  $\text{CDCl}_3$ )  $\delta$  179.9, 174.1, 161.3, 158.5, 146.5, 142.3, 135.6, 129.2, 128.8, 128.0, 127.4, 125.5, 104.4, 83.6, 60.3, 46.2, 28.1, 21.8, 14.2.

HRMS (ESI)  $m/z$   $[\text{M}+\text{Na}]^+$  Calcd. for  $\text{C}_{26}\text{H}_{28}\text{N}_2\text{O}_5\text{Na}$ : 471.1890; found: 471.1904.

**Ethyl 1-benzyl-5-((tert-butoxycarbonyl)imino)-2-(4-methoxyphenyl)-4-oxo-4,5-dihydro-1H-pyrrole-3-carboxylate (1c)**

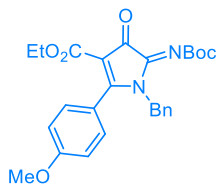

Yellow solid, m.p. 161.9 – 162.3 °C

$^1\text{H}$  NMR (400 MHz,  $\text{CDCl}_3$ )  $\delta$  major isomer: 7.28 – 7.18 (m, 6H), 6.99 – 6.90 (m, 4H), 4.76 (s, 2H), 4.12 (q,  $J = 7.1$  Hz, 2H), 3.86 (s, 3H), 1.62 (s, 9H), 1.14 (t,  $J = 7.1$  Hz, 3H).

$^{13}\text{C}$  NMR (101 MHz,  $\text{CDCl}_3$ )  $\delta$  179.5, 174.1, 162.5, 161.5, 158.6, 146.8, 135.7, 130.4, 128.8, 128.0, 127.3, 120.2, 113.9, 104.2, 83.5, 60.3, 55.6, 46.4, 28.1, 14.3.

HRMS (ESI)  $m/z$   $[\text{M}+\text{Na}]^+$  Calcd. for  $\text{C}_{26}\text{H}_{28}\text{N}_2\text{O}_6\text{Na}$ : 487.1840; found: 487.1850.

**Ethyl 1-benzyl-5-((tert-butoxycarbonyl)imino)-2-(4-fluorophenyl)-4-oxo-4,5-dihydro-1H-pyrrole-3-carboxylate (1d)**

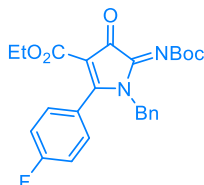

Yellow solid, m.p. 133.7 – 134.2 °C

$^1\text{H}$  NMR (400 MHz,  $\text{CDCl}_3$ )  $\delta$  major isomer: 7.25 – 7.17 (m, 5H), 7.16 – 7.11 (m, 2H), 6.91 (dd,  $J = 6.6, 2.9$  Hz, 2H), 4.71 (s, 2H), 4.08 (q,  $J = 7.1$  Hz, 2H), 1.62 (s, 9H), 1.10 (t,  $J = 7.1$  Hz, 3H).

$^{13}\text{C}$  NMR (101 MHz,  $\text{CDCl}_3$ )  $\delta$  major isomer: 178.4, 173.9, 164.5 (d,  $J = 254.5$  Hz, 1C), 161.1, 158.4, 146.2, 135.5, 130.4 (d,  $J = 9.1$  Hz, 2C), 128.9, 128.2, 127.3, 124.5 (d,  $J = 3.0$  Hz, 1C), 115.9 (d,  $J = 22.2$  Hz, 2C), 104.7, 83.8, 60.4, 46.3, 28.1, 14.2.

HRMS (ESI)  $m/z$   $[\text{M}+\text{Na}]^+$  Calcd. for  $\text{C}_{25}\text{H}_{25}\text{FN}_2\text{O}_5\text{Na}$ : 475.1640; found: 475.1666.

**Ethyl 1-benzyl-5-((*tert*-butoxycarbonyl)imino)-2-(4-chlorophenyl)-4-oxo-4,5-dihydro-1H-pyrrole-3-carboxylate (1e)**

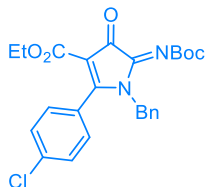

Yellow solid, m.p. 149.2 – 149.8 °C

$^1\text{H}$  NMR (400 MHz,  $\text{CDCl}_3$ )  $\delta$  major isomer: 7.44 – 7.38 (m, 2H), 7.26 – 7.20 (m, 3H), 7.16 – 7.10 (m, 2H), 6.97 – 6.87 (m, 2H), 4.70 (s, 2H), 4.09 (q,  $J = 7.1$  Hz, 2H), 1.62 (s, 9H), 1.10 (t,  $J = 7.1$  Hz, 3H).

$^{13}\text{C}$  NMR (101 MHz,  $\text{CDCl}_3$ )  $\delta$  major isomer: 178.3, 173.8, 161.0, 158.3, 146.1, 137.9, 135.4, 129.4, 129.0, 128.9, 128.2, 127.3, 104.7, 83.8, 60.5, 46.3, 28.1, 14.2.

HRMS (ESI)  $m/z$   $[\text{M}+\text{Na}]^+$  Calcd. for  $\text{C}_{25}\text{H}_{25}\text{ClN}_2\text{O}_5\text{Na}$ : 491.1344, 493.1327; found: 491.1359, 493.1339.

**Ethyl 1-benzyl-2-(4-bromophenyl)-5-((*tert*-butoxycarbonyl)imino)-4-oxo-4,5-dihydro-1H-pyrrole-3-carboxylate (1f)**

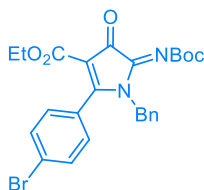

Yellow solid, m.p. 161.0 – 162.3 °C

$^1\text{H}$  NMR (400 MHz,  $\text{CDCl}_3$ )  $\delta$  major isomer: 7.61 – 7.55 (m, 2H), 7.25 (dd,  $J = 6.2, 3.4$  Hz, 3H), 7.10 – 7.03 (m, 2H), 6.96 – 6.87 (m, 2H), 4.70 (s, 2H), 4.09 (q,  $J = 7.1$  Hz, 2H), 1.62 (s, 9H), 1.11 (t,  $J = 7.1$  Hz, 3H).

$^{13}\text{C}$  NMR (101 MHz,  $\text{CDCl}_3$ )  $\delta$  major isomer: 178.3, 173.8, 161.0, 158.3, 146.1, 135.4, 131.9, 129.5, 129.0, 128.2, 127.3, 126.2, 104.6, 83.8, 60.5, 46.3, 28.1, 14.2.

HRMS (ESI)  $m/z$   $[\text{M}+\text{Na}]^+$  Calcd. for  $\text{C}_{25}\text{H}_{25}\text{BrN}_2\text{O}_5\text{Na}$ : 535.0839, 537.0822; found: 535.0856, 535.0842.

**Ethyl 1-benzyl-5-((*tert*-butoxycarbonyl)imino)-4-oxo-2-(*m*-tolyl)-4,5-dihydro-1H-pyrrole-3-carboxylate (1g)**

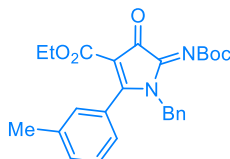

Yellow solid, m.p. 115.8 – 116.7 °C

**<sup>1</sup>H NMR (400 MHz, CDCl<sub>3</sub>)** δ major isomer: 7.32 (d, *J* = 5.1 Hz, 2H), 7.25 – 7.20 (m, 3H), 7.04 – 6.98 (m, 1H), 6.94 – 6.88 (m, 3H), 4.68 (s, 2H), 4.06 (q, *J* = 7.1 Hz, 2H), 2.30 (s, 3H), 1.62 (s, 9H), 1.06 (t, *J* = 7.1 Hz, 3H).

**<sup>13</sup>C NMR (101 MHz, CDCl<sub>3</sub>)** δ major isomer: 179.8, 174.1, 161.1, 158.5, 146.4, 138.3, 135.7, 132.2, 128.7, 128.5, 128.4, 128.2, 128.0, 127.5, 124.9, 104.4, 83.6, 60.2, 46.3, 28.1, 21.4, 14.1.

**HRMS (ESI)** *m/z* [M+Na]<sup>+</sup> Calcd. for C<sub>26</sub>H<sub>28</sub>BrN<sub>2</sub>O<sub>5</sub>Na: 471.1890; found: 471.1909.

**Ethyl 1-benzyl-5-((*tert*-butoxycarbonyl)imino)-4-oxo-2-(2,4,5-trifluorophenyl)-4,5-dihydro-1H-pyrrole-3-carboxylate (1h)**

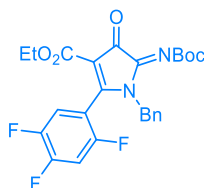

Yellow solid, m.p. 65.1 – 66.5 °C

**<sup>1</sup>H NMR (400 MHz, CDCl<sub>3</sub>)** δ major isomer: 7.25 – 7.20 (m, 3H), 7.05 – 6.97 (m, 1H), 6.93 – 6.87 (m, 2H), 6.87 – 6.80 (m, 1H), 4.88 (d, *J* = 15.7 Hz, 1H), 4.57 (d, *J* = 15.7 Hz, 1H), 4.11 (q, *J* = 7.1 Hz, 2H), 1.63 (s, 9H), 1.14 (t, *J* = 7.1 Hz, 3H).

**<sup>13</sup>C NMR (101 MHz, CDCl<sub>3</sub>)** δ major isomer: 173.4, 171.4, 160.5, 158.1, 155.6 – 147.9 (m, 3C), 145.5, 134.9, 129.0, 128.5, 127.2, 117.7 – 117.4 (m, 1C), 113.2 – 112.9 (m, 1C), 106.9 – 106.4 (m, 1C), 105.8, 84.0, 60.6, 46.4, 28.1, 14.1.

**HRMS (ESI)** *m/z* [M+Na]<sup>+</sup> Calcd. for C<sub>25</sub>H<sub>23</sub>F<sub>3</sub>N<sub>2</sub>O<sub>5</sub>Na: 511.1451; found: 511.1473.

**Ethyl 1-benzyl-5-((*tert*-butoxycarbonyl)imino)-2-(naphthalen-2-yl)-4-oxo-4,5-dihydro-1H-pyrrole-3-carboxylate (1i)**

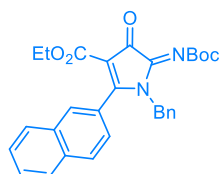

Yellow solid, m.p. 171.5 – 172.6 °C

**<sup>1</sup>H NMR (400 MHz, CDCl<sub>3</sub>)** δ 7.89 (d, *J* = 8.5 Hz, 2H), 7.74 (d, *J* = 8.0 Hz, 1H), 7.67 (s, 1H), 7.64 – 7.52 (m, 2H), 7.26 (dd, *J* = 8.2, 2.0 Hz, 1H), 7.24 – 7.16 (m, 3H), 6.90 (dd, *J* = 7.9, 1.4 Hz, 2H), 4.75 (s, 2H), 4.05 (q, *J* = 7.1 Hz, 2H), 1.64 (s, 10H), 1.00 (t, *J* = 7.1 Hz, 3H).

**<sup>13</sup>C NMR (101 MHz, CDCl<sub>3</sub>)** δ 179.6, 174.1, 161.2, 158.5, 146.5, 135.7, 134.4, 132.1, 128.9, 128.8, 128.4, 128.3, 128.3, 128.1, 128.1, 127.5, 127.3, 125.8, 124.5, 104.7, 83.7, 77.5, 77.2, 76.8, 60.3, 46.5, 28.1, 14.1.

**HRMS (ESI)** *m/z* [M+Na]<sup>+</sup> Calcd. for C<sub>29</sub>H<sub>28</sub>N<sub>2</sub>O<sub>5</sub>Na: 507.1890; found: 507.1898.

**Ethyl 1-benzyl-5-((*tert*-butoxycarbonyl)imino)-2-(naphthalen-1-yl)-4-oxo-4,5-dihydro-1H-pyrrole-3-carboxylate (1j)**

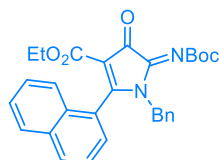

Yellow solid, m.p. 70.2 – 71.3 °C

**<sup>1</sup>H NMR (400 MHz, CDCl<sub>3</sub>)** δ 8.00 (d, *J* = 8.3 Hz, 1H), 7.91 (d, *J* = 8.1 Hz, 1H), 7.59 – 7.37 (m, 4H), 7.22 – 7.16 (m, 1H), 7.14 – 6.97 (m, 3H), 6.70 – 6.60 (m, 2H), 4.74 (d, *J* = 15.3 Hz, 1H), 4.38 (d, *J* = 15.3 Hz, 1H), 3.86 (q, *J* = 7.1 Hz, 2H), 1.67 (s, 9H), 0.73 (t, *J* = 7.1 Hz, 3H).

**<sup>13</sup>C NMR (101 MHz, CDCl<sub>3</sub>)** δ 178.9, 174.2, 160.7, 158.6, 146.2, 135.3, 133.1, 131.4, 129.6, 128.7, 128.5, 128.0, 127.8, 127.8, 126.9, 126.6, 125.9, 124.7, 124.3, 105.7, 83.8, 77.5, 77.2, 76.8, 60.0, 46.3, 28.1, 13.7.

**HRMS (ESI)** *m/z* [M+Na]<sup>+</sup> Calcd. for C<sub>29</sub>H<sub>28</sub>N<sub>2</sub>O<sub>5</sub>Na: 507.1890; found: 507.1908.

**Ethyl 1-benzyl-5-((tert-butoxycarbonyl)imino)-2-(furan-2-yl)-4-oxo-4,5-dihydro-1H-pyrrole-3-carboxylate (1k)**

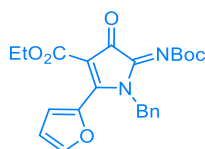

Brown solid, m.p. 44.8 – 45.3 °C

**<sup>1</sup>H NMR (400 MHz, CDCl<sub>3</sub>)** δ 7.74 (dd, *J* = 1.6, 0.5 Hz, 1H), 7.61 (dd, *J* = 3.8, 0.5 Hz, 1H), 7.28 – 7.20 (m, 3H), 7.08 (dd, *J* = 7.7, 1.5 Hz, 2H), 6.62 (dd, *J* = 3.8, 1.7 Hz, 1H), 5.17 (s, 2H), 4.27 (q, *J* = 7.1 Hz, 2H), 1.61 (s, 9H), 1.30 (t, *J* = 7.1 Hz, 3H).

**<sup>13</sup>C NMR (101 MHz, CDCl<sub>3</sub>)** δ 173.5, 162.7, 162.0, 158.8, 147.8, 147.1, 141.4, 136.0, 128.8, 127.9, 126.6, 125.7, 113.7, 102.6, 83.4, 60.8, 47.6, 28.1, 14.4.

**HRMS (ESI)** *m/z* [M+Na]<sup>+</sup> Calcd. for C<sub>23</sub>H<sub>24</sub>N<sub>2</sub>O<sub>6</sub>Na: 447.1527; found: 447.1535.

**Ethyl 1-benzyl-5-((tert-butoxycarbonyl)imino)-4-oxo-2-(thiophen-2-yl)-4,5-dihydro-1H-pyrrole-3-carboxylate (1l)**

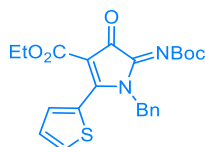

Yellow solid, m.p. 125.2 – 125.7 °C

**<sup>1</sup>H NMR (400 MHz, CDCl<sub>3</sub>)** δ 7.71 (dd, *J* = 5.0, 1.1 Hz, 1H), 7.31 – 7.24 (m, 4H), 7.15 (dd, *J* = 4.9, 3.8 Hz, 1H), 7.03 (dd, *J* = 7.5, 1.9 Hz, 2H), 4.91 (s, 2H), 4.17 (q, *J* = 7.1 Hz, 2H), 1.61 (s, 9H), 1.18 (t, *J* = 7.1 Hz, 3H).

**<sup>13</sup>C NMR (101 MHz, CDCl<sub>3</sub>)** δ 173.7, 171.6, 161.4, 158.5, 146.5, 135.7, 133.2, 132.6, 129.0, 128.0, 127.8, 127.2, 126.9, 105.4, 83.6, 60.6, 46.6, 28.1, 14.2.

**HRMS (ESI)** *m/z* [M+Na]<sup>+</sup> Calcd. for C<sub>23</sub>H<sub>24</sub>N<sub>2</sub>O<sub>5</sub>SNa: 463.1298; found: 463.1306.

**Methyl 1-benzyl-5-((tert-butoxycarbonyl)imino)-4-oxo-2-phenyl-4,5-dihydro-1H-pyrrole-3-carboxylate (1m)**

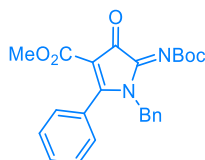

Yellow solid, m.p. 165.7 – 166.2 °C

<sup>1</sup>H NMR (400 MHz, CDCl<sub>3</sub>) δ 7.58 – 7.51 (m, 1H), 7.48 – 7.39 (m, 2H), 7.25 – 7.18 (m, 5H), 6.93 – 6.85 (m, 2H), 4.72 (s, 2H), 3.64 (s, 3H), 1.63 (s, 10H).

<sup>13</sup>C NMR (101 MHz, CDCl<sub>3</sub>) δ 180.2, 173.9, 161.7, 158.4, 146.3, 135.4, 131.6, 128.8, 128.5, 128.3, 128.1, 127.8, 127.5, 104.0, 83.7, 51.5, 46.2, 28.1.

HRMS (ESI) m/z [M+Na]<sup>+</sup> Calcd. for C<sub>24</sub>H<sub>24</sub>N<sub>2</sub>O<sub>5</sub>Na: 443.1577; found: 443.1581.

**Ethyl 5-((tert-butoxycarbonyl)imino)-1-(4-methoxyphenyl)-4-oxo-2-phenyl-4,5-dihydro-1H-pyrrole-3-carboxylate (1n)**

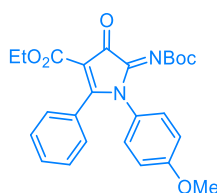

Yellow solid, m.p. 180.7 – 182.2 °C

<sup>1</sup>H NMR (400 MHz, CDCl<sub>3</sub>) δ 7.44 – 7.37 (m, 1H), 7.35 – 7.29 (m, 2H), 7.28 – 7.22 (m, 2H), 7.00 – 6.94 (m, 2H), 6.80 – 6.74 (m, 2H), 4.15 (q, *J* = 7.1 Hz, 2H), 3.74 (s, 3H), 1.58 (s, 9H), 1.13 (t, *J* = 7.1 Hz, 3H).

<sup>13</sup>C NMR (101 MHz, CDCl<sub>3</sub>) δ 177.7, 174.1, 161.4, 159.5, 158.6, 146.9, 131.5, 129.7, 129.1, 128.4, 128.1, 126.2, 114.5, 104.6, 83.6, 60.5, 55.5, 28.1, 14.2.

HRMS (ESI) m/z [M+Na]<sup>+</sup> Calcd. for C<sub>26</sub>H<sub>29</sub>N<sub>2</sub>O<sub>6</sub>: 465.2020; found: 465.2016.

### 3. General experimental procedure for the asymmetric synthesis of compounds **3**

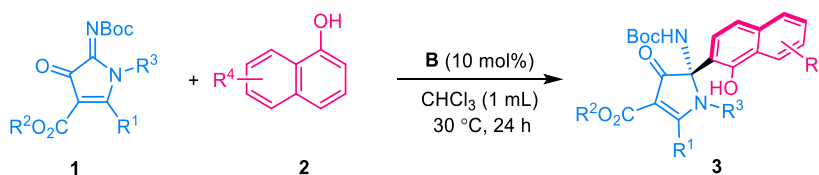

In a reaction tube equipped with a magnetic stirring bar was charged with pyrrolinone ketimines **1** (0.10 mmol), naphthols **2** (0.15 mmol), and 9-anthryl-substituted chiral phosphoric acid **B** (0.01 mmol). CHCl<sub>3</sub> (1.0 mL) was added to the tube via syringe. Then the mixture was stirred for indicated time at 30 °C. After completion, the reaction mixture was directly purified by flash chromatography on silica gel (petroleum ether/ ethyl acetate) to give the corresponding product **3**.

**Ethyl (S)-1-benzyl-4-((tert-butoxycarbonyl)amino)-4-(1-hydroxynaphthalen-2-yl)-5-oxo-2-phenyl-4,5-dihydro-1H-pyrrole-3-carboxylate (3aa).**

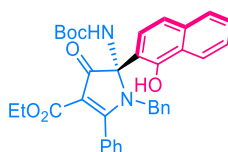

It was purified by flash chromatography (petroleum ether/EtOAc = 3:1) as white solid (51.5 mg, 89% yield); 98% *ee*;  $[\alpha]_{\text{D}}^{20} = -524.2$  (*c* 2.57, CH<sub>2</sub>Cl<sub>2</sub>); m.p. 129.7 – 130.9 °C.

**<sup>1</sup>H NMR (400 MHz, CDCl<sub>3</sub>)** δ 10.70 (s, 1H), 8.55 – 8.32 (m, 1H), 7.87 – 7.67 (m, 1H), 7.39 (d, *J* = 69.0 Hz, 8H), 7.22 – 6.62 (m, 6H), 5.97 (s, 1H), 4.95 (d, *J* = 15.9 Hz, 1H), 4.65 (d, *J* = 15.7 Hz, 1H), 4.10 – 3.90 (m, 2H), 1.37 (s, 9H), 1.04 (t, *J* = 6.5 Hz, 3H).

**<sup>13</sup>C NMR (101 MHz, CDCl<sub>3</sub>)** δ 196.6, 180.5, 162.7, 154.5, 153.3, 135.6, 135.0, 130.6, 130.4, 128.5, 127.9, 127.7, 127.2, 126.1, 123.3, 121.5, 120.5, 113.4, 100.8, 82.9, 81.6, 59.6, 48.9, 28.3, 14.2.

**HPLC (IA, ethanol/n-hexane = 20/80, flow rate = 1.0 mL/min, λ = 254 nm)** *t*<sub>R</sub> = 6.29 min (major), 8.98 (minor).

**HRMS (ESI)** *m/z* [M+H]<sup>+</sup> Calcd. for C<sub>35</sub>H<sub>35</sub>N<sub>2</sub>O<sub>6</sub>: 579.2490; found: 579.2507.

**Ethyl (R)-1-benzyl-5-((tert-butoxycarbonyl)amino)-5-(1-hydroxynaphthalen-2-yl)-4-oxo-2-(p-tolyl)-4,5-dihydro-1H-pyrrole-3-carboxylate (3ba)**

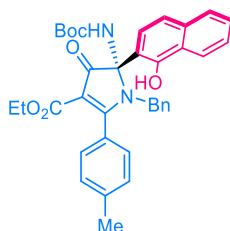

It was purified by flash chromatography (petroleum ether/EtOAc = 4:1) as white solid (57.9 mg, 98% yield); 97% *ee*;  $[\alpha]_{\text{D}}^{20} = -820.4$  (*c* 1.45, CH<sub>2</sub>Cl<sub>2</sub>); m.p. 124.0 – 125.1 °C.

**<sup>1</sup>H NMR (400 MHz, CDCl<sub>3</sub>)** δ 10.50 – 10.07 (m, 1H), 8.43 (d, *J* = 7.8 Hz, 1H), 7.86 (d, *J* = 8.1 Hz, 1H), 7.72 – 7.29 (m, 7H), 7.22 – 7.09 (m, 3H), 7.09 – 6.76 (m, 3H), 6.04 – 5.48 (m, 1H), 4.88 (d, *J* = 15.7 Hz, 1H), 4.60 (d, *J* = 15.5 Hz, 1H), 4.08 – 3.83 (m, 2H), 2.59 (s, 3H), 1.38 (s, 9H), 1.04 (t, *J* = 7.1 Hz, 3H).

**<sup>13</sup>C NMR (101 MHz, CDCl<sub>3</sub>)** δ 196.6, 180.5, 162.8, 153.4, 152.7, 135.4, 133.9, 130.7, 130.5, 128.6, 128.5, 128.2, 128.1, 127.8, 127.6, 126.6, 125.8, 123.8, 123.7, 122.0, 112.7, 101.0, 82.9, 81.6, 59.7, 48.9, 28.3, 19.6, 14.2.

**HPLC (IC, ethanol/n-hexane = 40/60, flow rate = 1.0 mL/min, λ = 254 nm)** *t*<sub>R</sub> = 3.86 min (major), 9.55 (minor).

**HRMS (ESI)** *m/z* [M+H]<sup>+</sup> Calcd. for C<sub>36</sub>H<sub>37</sub>N<sub>2</sub>O<sub>6</sub>: 593.2646; found: 593.2669.

**Ethyl (R)-1-benzyl-5-((tert-butoxycarbonyl)amino)-5-(1-hydroxynaphthalen-2-yl)-2-(4-methoxyphenyl)-4-oxo-4,5-dihydro-1H-pyrrole-3-carboxylate (3ca)**

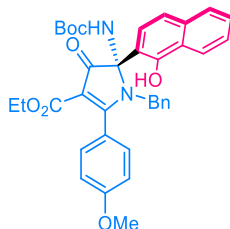

It was purified by flash chromatography (petroleum ether/EtOAc = 4:1) as white solid (55.1 mg, 90% yield); 97% *ee*;  $[\alpha]_{\text{D}}^{20} = -684.8$  (*c* 1.38, CH<sub>2</sub>Cl<sub>2</sub>); m.p. 111.2 – 111.8 °C.

**<sup>1</sup>H NMR (400 MHz, CDCl<sub>3</sub>)** δ 10.89 – 10.46 (m, 1H), 8.39 (d, *J* = 7.4 Hz, 1H), 8.06 (d, *J* = 8.3 Hz, 1H), 7.72 – 7.30 (m, 8H), 7.22 – 6.71 (m, 5H), 6.05 – 5.62 (m, 1H), 4.86 (d, *J* = 15.6 Hz, 1H), 4.60 (d, *J* = 15.4 Hz, 1H), 4.12 – 3.91 (m, 2H), 1.39 (s, 9H), 1.03 (t, *J* = 7.1 Hz, 3H).



$^{13}\text{C}$  NMR (101 MHz,  $\text{CDCl}_3$ )  $\delta$  196.6, 181.0, 162.6, 154.1, 153.2, 135.0, 133.1, 130.6, 130.5, 129.1, 128.9, 128.7, 128.6, 128.2, 128.0, 126.8, 126.7, 125.5, 123.7, 114.1, 113.5, 101.2, 82.2, 81.9, 59.8, 48.8, 28.3, 14.2.

HPLC (IC, ethanol/n-hexane = 40/60, flow rate = 1.0 mL/min,  $\lambda$  = 254 nm)  $t_{\text{R}}$  = 3.94 min (major), 10.06 (minor).

HRMS (ESI)  $m/z$   $[\text{M}+\text{H}]^+$  Calcd. for  $\text{C}_{36}\text{H}_{36}\text{N}_2\text{O}_7\text{Na}$ : 631.2415; found: 631.2313.

**Ethyl (*R*)-1-benzyl-5-((*tert*-butoxycarbonyl)amino)-2-(4-fluorophenyl)-5-(1-hydroxynaphthalen-2-yl)-4-oxo-4,5-dihydro-1H-pyrrole-3-carboxylate (3da)**

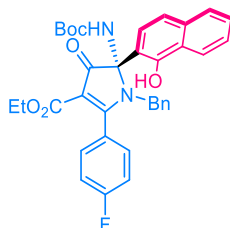

It was purified by flash chromatography (petroleum ether/EtOAc = 4:1) as white solid (58.8 mg, 98% yield); 98% *ee*;  $[\alpha]_{\text{D}}^{20}$  = -593.1 (*c* 1.47,  $\text{CH}_2\text{Cl}_2$ ); m.p. 119.7 – 120.5 °C.

$^1\text{H}$  NMR (400 MHz,  $\text{CDCl}_3$ )  $\delta$  10.67 (s, 1H), 8.40 (d,  $J$  = 6.8 Hz, 1H), 7.91 – 7.65 (m, 1H), 7.63 – 7.27 (m, 5H), 7.22 – 6.62 (m, 8H), 6.04 (s, 1H), 4.92 (d,  $J$  = 15.7 Hz, 1H), 4.69 (d,  $J$  = 15.8 Hz, 1H), 4.11 – 3.92 (m, 2H), 1.39 (s, 9H), 1.07 (t,  $J$  = 6.8 Hz, 3H).

$^{13}\text{C}$  NMR (101 MHz,  $\text{CDCl}_3$ )  $\delta$  196.5, 179.6, 163.8 (d,  $J$  = 252.7 Hz, 1C), 162.7, 154.5, 153.4, 135.5, 135.0, 128.5, 127.9, 127.8 (2C), 127.2, 126.5, 126.1, 123.3, 121.3, 120.5, 115.8 (d,  $J$  = 23.2 Hz, 1C), 113.3, 100.9, 83.0, 81.7, 59.7, 49.0, 28.2, 14.2.

$^{19}\text{F}$  NMR (377 MHz,  $\text{CDCl}_3$ )  $\delta$  -109.0

HPLC (IC, ethanol/n-hexane = 40/60, flow rate = 1.0 mL/min,  $\lambda$  = 254 nm)  $t_{\text{R}}$  = 3.63 min (major), 9.12 (minor).

HRMS (ESI)  $m/z$   $[\text{M}+\text{Na}]^+$  Calcd. for  $\text{C}_{35}\text{H}_{33}\text{FN}_2\text{O}_6\text{Na}$ : 619.2215; found: 619.2227.

**Ethyl (*R*)-1-benzyl-5-((*tert*-butoxycarbonyl)amino)-2-(4-chlorophenyl)-5-(1-hydroxynaphthalen-2-yl)-4-oxo-4,5-dihydro-1H-pyrrole-3-carboxylate (3ea)**

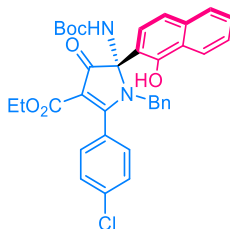

It was purified by flash chromatography (petroleum ether/EtOAc = 4:1) as white solid (60.5 mg, 99% yield); 97% *ee*;  $[\alpha]_{\text{D}}^{20}$  = -642.2 (*c* 1.51,  $\text{CH}_2\text{Cl}_2$ ); m.p. 125.4 – 126.1 °C.

$^1\text{H}$  NMR (400 MHz,  $\text{CDCl}_3$ )  $\delta$  10.63 (s, 1H), 8.39 (d,  $J$  = 7.0 Hz, 1H), 7.97 – 7.67 (m, 1H), 7.64 – 7.24 (m, 7H), 7.19 – 6.62 (m, 6H), 6.02 (s, 1H), 4.89 (d,  $J$  = 15.8 Hz, 1H), 4.68 (d,  $J$  = 15.7 Hz, 1H), 4.14 – 3.93 (m, 2H), 1.39 (s, 9H), 1.07 (t,  $J$  = 6.9 Hz, 3H).

$^{13}\text{C}$  NMR (101 MHz,  $\text{CDCl}_3$ )  $\delta$  196.4, 179.4, 162.7, 154.5, 153.4, 136.7, 135.4, 135.0, 128.8, 128.6, 127.9, 127.8, 127.2, 126.2, 123.2, 121.3, 120.6, 113.2, 100.9, 83.1, 81.7, 59.8, 49.0, 28.2, 14.3.

**HPLC** (IC, ethanol/n-hexane = 40/60, flow rate = 1.0 mL/min,  $\lambda$  = 254 nm)  $t_R$  = 3.64 min (major), 9.27 (minor).

**HRMS (ESI)**  $m/z$   $[M+H]^+$  Calcd. for  $C_{35}H_{34}ClN_2O_6$ : 613.2100, 615.2090; found: 613.2120, 615.2122.

**Ethyl (R)-1-benzyl-2-(4-bromophenyl)-5-((tert-butoxycarbonyl)amino)-5-(1-hydroxynaphthalen-2-yl)-4-oxo-4,5-dihydro-1H-pyrrole-3-carboxylate (3fa)**

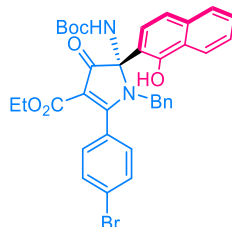

It was purified by flash chromatography (petroleum ether/EtOAc = 4:1) as white solid (64.5 mg, 98% yield); 97% *ee*;  $[\alpha]_D^{20}$  = -666.0 (*c* 1.61,  $CH_2Cl_2$ ); m.p. 128.8 – 129.4 °C.

**$^1H$  NMR (400 MHz,  $CDCl_3$ )**  $\delta$  10.63 (s, 1H), 8.53 – 8.31 (m, 1H), 7.90 – 7.23 (m, 8H), 7.20 – 6.62 (m, 6H), 6.05 (s, 1H), 4.90 (d,  $J$  = 16.2 Hz, 1H), 4.69 (d,  $J$  = 15.9 Hz, 1H), 4.14 – 3.82 (m, 2H), 1.39 (s, 9H), 1.07 (t,  $J$  = 6.8 Hz, 3H).

**$^{13}C$  NMR (101 MHz,  $CDCl_3$ )**  $\delta$  196.4, 179.3, 162.7, 154.5, 153.4, 135.4, 134.9, 131.7, 129.4, 128.5, 127.8, 127.7, 127.1, 126.1, 125.0, 123.2, 121.3, 120.5, 113.1, 100.9, 83.1, 81.7, 59.8, 49.0, 28.2, 14.2.

**HPLC** (IC, ethanol/n-hexane = 40/60, flow rate = 1.0 mL/min,  $\lambda$  = 254 nm)  $t_R$  = 3.69 min (major), 9.51 (minor).

**HRMS (ESI)**  $m/z$   $[M+H]^+$  Calcd. for  $C_{35}H_{34}BrN_2O_6$ : 657.1595, 659.1581; found: 657.1604, 659.1594.

**Ethyl (R)-1-benzyl-5-((tert-butoxycarbonyl)amino)-5-(1-hydroxynaphthalen-2-yl)-4-oxo-2-(*m*-tolyl)-4,5-dihydro-1H-pyrrole-3-carboxylate (3ga)**

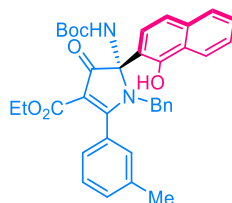

It was purified by flash chromatography (petroleum ether/EtOAc = 4:1) as white solid (44.3 mg, 75% yield); 98% *ee*;  $[\alpha]_D^{20}$  = -847.9 (*c* 1.11,  $CH_2Cl_2$ ); m.p. 117.5 – 118.2 °C.

**$^1H$  NMR (400 MHz,  $CDCl_3$ )**  $\delta$  10.72 (s, 1H), 8.42 (t,  $J$  = 11.5 Hz, 1H), 7.92 – 7.66 (m, 1H), 7.65 – 7.23 (m, 6H), 7.22 – 6.60 (m, 7H), 6.01 (s, 1H), 4.95 (d,  $J$  = 15.5 Hz, 1H), 4.64 (d,  $J$  = 15.6 Hz, 1H), 4.15 – 3.87 (m, 2H), 2.37 (s, 3H), 1.38 (s, 9H), 1.05 (t,  $J$  = 6.4 Hz, 3H).

**$^{13}C$  NMR (101 MHz,  $CDCl_3$ )**  $\delta$  196.6, 180.8, 162.7, 154.5, 153.3, 138.3, 135.6, 135.0, 131.2, 130.5, 128.4, 128.0, 127.9, 127.8, 127.6, 127.1, 126.0, 123.3, 121.5, 120.4, 113.4, 100.7, 82.9, 81.5, 59.6, 49.0, 28.3, 14.2.

**HPLC** (IC, ethanol/n-hexane = 40/60, flow rate = 1.0 mL/min,  $\lambda$  = 254 nm)  $t_R$  = 3.69 min (major), 9.51 (minor).

**HRMS (ESI)**  $m/z$   $[M+Na]^+$  Calcd. for  $C_{36}H_{36}N_2O_6Na$ : 615.2466; found: 615.2475.

**Ethyl (R)-1-benzyl-5-((tert-butoxycarbonyl)amino)-5-(1-hydroxynaphthalen-2-yl)-4-oxo-2-(2,4,5-trifluorophenyl)-4,5-dihydro-1H-pyrrole-3-carboxylate (3ha)**

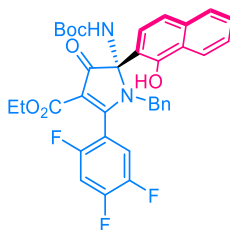

It was purified by flash chromatography (petroleum ether/EtOAc = 4:1) as white solid (52.5 mg, 83% yield); 98% *ee*;  $[\alpha]_D^{20} = -695.3$  (*c* 1.31, CH<sub>2</sub>Cl<sub>2</sub>); m.p. 124.1 – 124.7 °C.

**<sup>1</sup>H NMR (400 MHz, CDCl<sub>3</sub>)** δ 10.68 – 10.19 (m, 1H), 8.40 (d, *J* = 8.3 Hz, 1H), 7.87 – 7.63 (m, 1H), 7.50 (d, *J* = 13.7, 6.2 Hz, 2H), 7.39 – 7.27 (m, 1H), 7.25 – 6.72 (m, 8H), 6.09 (s, 1H), 4.79 (q, *J* = 16.1 Hz, 2H), 4.16 – 3.93 (m, 2H), 1.48 – 1.38 (m, 9H), 1.12 (t, *J* = 7.1 Hz, 3H).

**<sup>13</sup>C NMR (101 MHz, CDCl<sub>3</sub>)** δ 196.5, 172.9, 162.4, 154.2, 153.6, 135.2, 135.1, 128.7, 128.1, 127.9, 127.8, 127.7, 127.2, 126.1, 123.3, 123.2, 121.8, 121.8, 120.7, 120.7, 113.1, 107.1 – 105.6 (1C), 101.3, 83.8, 82.1, 60.0, 49.7, 28.3, 14.3.

**<sup>19</sup>F NMR (377 MHz, CDCl<sub>3</sub>)** δ -114.6 (dd, *J* = 14.0, 4.6 Hz), -127.9 (dd, *J* = 21.4, 4.6 Hz), -141.0 (dd, *J* = 21.3, 14.3 Hz).

**HPLC** (IA, ethanol/n-hexane = 10/90, flow rate = 1.0 mL/min, λ = 254 nm) *t<sub>R</sub>* = 20.43 min (major), 29.48 (minor).

**HRMS (ESI)** *m/z* [M+H]<sup>+</sup> Calcd. for C<sub>35</sub>H<sub>32</sub>F<sub>3</sub>N<sub>2</sub>O<sub>6</sub>: 633.2207; found: 633.2224.

**Ethyl (R)-1-benzyl-5-((tert-butoxycarbonyl)amino)-5-(1-hydroxynaphthalen-2-yl)-2-(naphthalen-2-yl)-4-oxo-4,5-dihydro-1H-pyrrole-3-carboxylate (3ia)**

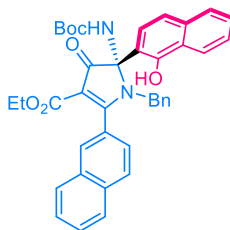

It was purified by flash chromatography (petroleum ether/EtOAc = 4:1) as white solid (62.1 mg, 99% yield); 64% *ee*;  $[\alpha]_D^{20} = -697.7$  (*c* 1.55, CH<sub>2</sub>Cl<sub>2</sub>); m.p. 129.3 – 130.5 °C.

**<sup>1</sup>H NMR (400 MHz, CDCl<sub>3</sub>)** δ 10.74 (s, 1H), 8.43 (d, *J* = 6.9 Hz, 1H), 8.15 – 7.68 (m, 5H), 7.66 – 7.30 (m, 6H), 7.24 – 6.58 (m, 6H), 6.02 (s, 1H), 5.02 (d, *J* = 13.1 Hz, 1H), 4.84 – 4.17 (m, 1H), 4.13 – 3.84 (m, 2H), 1.39 (s, 9H), 1.06 – 0.92 (m, 3H).

**<sup>13</sup>C NMR (101 MHz, CDCl<sub>3</sub>)** δ 196.6, 180.6, 162.8, 154.6, 153.4, 135.5, 135.0, 133.9, 132.5, 128.6, 128.4, 128.1, 127.9, 127.7, 127.2, 127.0, 126.1, 123.3, 121.6, 120.5, 113.4, 101.0, 83.0, 81.5, 59.7, 49.0, 28.3, 14.2.

**HPLC** (IC, ethanol/n-hexane = 40/60, flow rate = 1.0 mL/min, λ = 254 nm) *t<sub>R</sub>* = 3.40 min (major), 10.34 (minor).

**HRMS (ESI)** *m/z* [M+H]<sup>+</sup> Calcd. for C<sub>39</sub>H<sub>37</sub>N<sub>2</sub>O<sub>6</sub>: 629.2646; found: 629.2669.

**Ethyl (R)-1-benzyl-5-((tert-butoxycarbonyl)amino)-5-(1-hydroxynaphthalen-2-yl)-2-(naphthalen-1-yl)-4-oxo-4,5-dihydro-1H-pyrrole-3-carboxylate (3ja)**

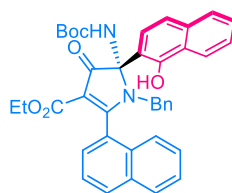

It was purified by flash chromatography (petroleum ether/EtOAc = 4:1) as white solid (33.9 mg, 54% yield); 64% *ee*;  $[\alpha]_D^{20} = -493.9$  (*c* 0.85, CH<sub>2</sub>Cl<sub>2</sub>); m.p. 129.8 – 130.5 °C.

**<sup>1</sup>H NMR (400 MHz, CDCl<sub>3</sub>)** δ 10.73 (s, 1H), 8.43 (d, *J* = 7.5 Hz, 1H), 7.97 (dd, *J* = 19.3, 8.1 Hz, 2H), 7.86 – 7.72 (m, 2H), 7.72 – 7.61 (m, 2H), 7.58 – 7.50 (m, 2H), 7.48 – 7.32 (m, 3H), 7.16 (d, *J* = 8.8 Hz, 1H), 6.89 (t, *J* = 7.3 Hz, 1H), 6.80 (t, *J* = 7.5 Hz, 2H), 6.64 (d, *J* = 7.4 Hz, 2H), 6.10 (d, *J* = 11.5 Hz, 1H), 4.78 (dd, *J* = 15.0, 3.0 Hz, 1H), 4.59 (dd, *J* = 15.0, 4.0 Hz, 1H), 3.92 – 3.61 (m, 2H), 1.51 (s, 9H), 0.64 (t, *J* = 7.1 Hz, 3H).

**<sup>13</sup>C NMR (101 MHz, CDCl<sub>3</sub>)** δ 196.8, 180.3, 162.3, 154.3, 153.3, 135.0, 134.0, 133.1, 131.1, 130.7, 129.6, 129.4, 128.0, 127.9, 127.8, 127.7, 127.3, 127.2, 126.7, 126.1, 126.0, 124.6, 123.9, 123.2, 121.9, 120.4, 113.3, 102.1, 83.1, 81.7, 59.3, 49.6, 28.4, 13.6.

**HPLC** (IC, ethanol/n-hexane = 40/60, flow rate = 1.0 mL/min, λ = 254 nm) *t<sub>R</sub>* = 3.83 min (major), 6.09 (minor).

**HRMS (ESI)** *m/z* [M+H]<sup>+</sup> Calcd. for C<sub>39</sub>H<sub>37</sub>N<sub>2</sub>O<sub>6</sub>: 629.2646; found: 629.2653.

**Ethyl (R)-1-benzyl-5-((tert-butoxycarbonyl)amino)-2-(furan-2-yl)-5-(1-hydroxynaphthalen-2-yl)-4-oxo-4,5-dihydro-1H-pyrrole-3-carboxylate (3ka)**

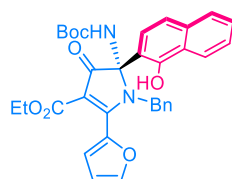

It was purified by flash chromatography (petroleum ether/EtOAc = 4:1) as white solid (49.1 mg, 86% yield); 95% *ee*;  $[\alpha]_D^{20} = -630.3$  (*c* 1.64, CH<sub>2</sub>Cl<sub>2</sub>); m.p. 72.2 – 72.7 °C.

**<sup>1</sup>H NMR (400 MHz, CDCl<sub>3</sub>)** δ 10.82 (s, 1H), 8.56 – 8.24 (m, 1H), 7.86 – 7.43 (m, 5H), 7.38 – 7.29 (m, 1H), 7.24 – 6.98 (m, 6H), 6.49 (s, 1H), 5.95 (s, 1H), 5.50 (d, *J* = 16.2 Hz, 1H), 4.78 (d, *J* = 16.1 Hz, 1H), 4.29 – 4.11 (m, 2H), 1.34 – 1.23 (m, 12H).

**<sup>13</sup>C NMR (101 MHz, CDCl<sub>3</sub>)** δ 196.1, 165.0, 163.3, 154.3, 153.4, 145.8, 141.5, 135.9, 135.1, 128.4, 127.8, 127.4, 127.2, 126.9, 126.0, 123.8, 123.2, 122.1, 120.5, 113.9, 112.7, 98.4, 83.2, 81.6, 60.1, 50.2, 28.2, 14.5.

**HPLC** (IC, ethanol/n-hexane = 40/60, flow rate = 1.0 mL/min, λ = 254 nm) *t<sub>R</sub>* = 3.89 min (major), 7.75 (minor).

**HRMS (ESI)** *m/z* [M+H]<sup>+</sup> Calcd. for C<sub>33</sub>H<sub>33</sub>N<sub>2</sub>O<sub>7</sub>: 569.2282; found: 569.2292

**Ethyl (R)-1-benzyl-5-((tert-butoxycarbonyl)amino)-5-(1-hydroxynaphthalen-2-yl)-4-oxo-2-(thiophen-2-yl)-4,5-dihydro-1H-pyrrole-3-carboxylate (3la)**

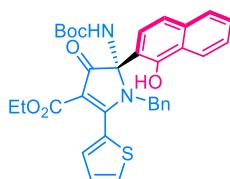

It was purified by flash chromatography (petroleum ether/EtOAc = 4:1) as white solid (52.6 mg, 90% yield); 96% *ee*;  $[\alpha]_D^{20} = -606.9$  (*c* 1.75, CH<sub>2</sub>Cl<sub>2</sub>); m.p. 117.3 – 118.0 °C.

**<sup>1</sup>H NMR (400 MHz, CDCl<sub>3</sub>)** δ 10.58 (s, 1H), 8.40 (s, 1H), 7.87 – 7.45 (m, 4H), 7.43 – 7.28 (m, 2H), 7.25 – 6.64 (m, 7H), 5.92 (s, 1H), 5.17 (d, *J* = 16.1 Hz, 1H), 4.69 (d, *J* = 15.7 Hz, 1H), 4.19 – 3.93 (m, 2H), 1.33 (s, 9H), 1.13 (t, *J* = 6.5 Hz, 3H).

**<sup>13</sup>C NMR (101 MHz, CDCl<sub>3</sub>)** δ 196.2, 173.4, 162.7, 154.5, 153.3, 135.7, 135.0, 131.5, 130.1, 128.6, 127.9, 127.6, 127.5, 127.2, 126.1, 123.2, 121.5, 120.6, 113.3, 101.7, 83.1, 81.6, 59.9, 49.2, 28.2, 14.3.

**HPLC** (IC, ethanol/n-hexane = 40/60, flow rate = 1.0 mL/min, λ = 254 nm) *t<sub>R</sub>* = 3.93 min (major), 5.54 (minor).

**HRMS (ESI)** *m/z* [M+H]<sup>+</sup> Calcd. for C<sub>33</sub>H<sub>33</sub>N<sub>2</sub>O<sub>6</sub>S: 585.2054; found: 585.2069.

**Methyl (R)-1-benzyl-5-((tert-butoxycarbonyl)amino)-5-(1-hydroxynaphthalen-2-yl)-4-oxo-2-phenyl-4,5-dihydro-1H-pyrrole-3-carboxylate (3ma)**

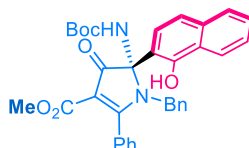

It was purified by flash chromatography (petroleum ether/EtOAc = 4:1) as white solid (54.5 mg, 97% yield); 98% *ee*;  $[\alpha]_D^{20} = -501.5$  (*c* 1.00, CH<sub>2</sub>Cl<sub>2</sub>); m.p. 126.9 – 127.5 °C.

**<sup>1</sup>H NMR (400 MHz, CDCl<sub>3</sub>)** δ 10.62 (s, 1H), 8.39 (d, *J* = 7.1 Hz, 1H), 7.70 (d, *J* = 6.7 Hz, 1H), 7.63 – 7.28 (m, 8H), 7.20 – 6.63 (m, 6H), 5.98 (s, 1H), 4.97 (d, *J* = 15.8 Hz, 1H), 4.64 (d, *J* = 15.8 Hz, 1H), 3.58 (s, 3H), 1.36 (s, 9H).

**<sup>13</sup>C NMR (101 MHz, CDCl<sub>3</sub>)** δ 196.5, 180.9, 163.3, 154.5, 153.4, 135.4, 135.0, 130.6, 130.2, 128.6, 128.5, 127.9, 127.7, 127.2, 126.1, 123.3, 121.4, 120.6, 113.2, 100.5, 83.0, 81.6, 51.1, 49.0, 28.2.

**HPLC** (IC, ethanol/n-hexane = 40/60, flow rate = 1.0 mL/min, λ = 254 nm) *t<sub>R</sub>* = 3.94 min (major), 7.73 (minor).

**HRMS (ESI)** *m/z* [M+H]<sup>+</sup> Calcd. for C<sub>34</sub>H<sub>33</sub>N<sub>2</sub>O<sub>6</sub>: 565.2333; found: 565.2332.

**Ethyl (R)-5-((tert-butoxycarbonyl)amino)-5-(1-hydroxynaphthalen-2-yl)-1-(4-methoxyphenyl)-4-oxo-2-phenyl-4,5-dihydro-1H-pyrrole-3-carboxylate (3na)**

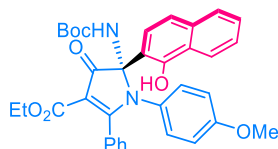

It was purified by flash chromatography (petroleum ether/EtOAc = 4:1) as white solid (24.5 mg, 41% yield); 14% *ee*;  $[\alpha]_D^{20} = -96.4$  (*c* 0.61, CH<sub>2</sub>Cl<sub>2</sub>); m.p. 104.9 – 105.8 °C.

**<sup>1</sup>H NMR (400 MHz, CDCl<sub>3</sub>)** δ 10.21 (s, 1H), 8.39 (d, *J* = 7.5 Hz, 1H), 7.78 (dd, *J* = 6.9, 2.1 Hz, 2H), 7.69 – 7.56 (m, 2H), 7.56 – 7.48 (m, 3H), 7.47 – 7.32 (m, 3H), 7.05 – 6.81 (m, 2H), 6.65 – 6.53 (m, 2H), 5.69 (s, 1H), 4.19 – 4.05 (m, 2H), 3.67 (s, 3H), 1.26 (s, 9H), 1.15 (t, *J* = 7.1 Hz, 3H).

$^{13}\text{C}$  NMR (101 MHz,  $\text{CDCl}_3$ )  $\delta$  197.6, 179.1, 163.1, 158.3, 154.1, 153.0, 135.2, 131.2, 130.3, 129.9, 128.7, 128.2, 127.8, 127.7, 127.2, 126.1, 123.2, 123.0, 120.3, 114.0, 113.7, 102.8, 84.2, 81.2, 60.0, 55.4, 28.1, 14.3.

HPLC (IC, ethanol/n-hexane = 40/60, flow rate = 1.0 mL/min,  $\lambda$  = 254 nm)  $t_{\text{R}}$  = 3.93 min (major), 5.95 (minor).

HRMS (ESI)  $m/z$   $[\text{M}+\text{Na}]^+$  Calcd. for  $\text{C}_{35}\text{H}_{34}\text{N}_2\text{O}_7\text{Na}$ : 617.2258; found: 617.2276.

**Ethyl (R)-1-benzyl-5-((tert-butoxycarbonyl)amino)-5-(1-hydroxy-3-methoxynaphthalen-2-yl)-4-oxo-2-phenyl-4,5-dihydro-1H-pyrrole-3-carboxylate (3ab).**

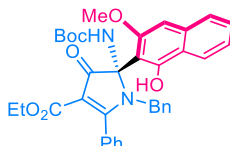

It was purified by flash chromatography (petroleum ether/EtOAc = 8:1) as white solid (36.3 mg, 60% yield); 99% *ee*;  $[\alpha]_{\text{D}}^{20}$  = 78.6 (*c* 0.91,  $\text{CH}_2\text{Cl}_2$ ); m.p. 95.0 – 95.6 °C.

$^1\text{H}$  NMR (400 MHz,  $\text{CDCl}_3$ )  $\delta$  8.33 – 8.00 (m, 1H), 7.58 (d,  $J$  = 8.3 Hz, 1H), 7.55 – 7.39 (m, 3H), 7.38 – 7.23 (m, 3H), 7.16 – 6.98 (m, 2H), 6.94 – 6.79 (m, 3H), 6.60 (d,  $J$  = 7.4 Hz, 2H), 6.40 (s, 1H), 6.15 – 5.69 (m, 1H), 4.85 (d,  $J$  = 17.0 Hz, 1H), 4.29 (d,  $J$  = 16.6 Hz, 1H), 4.02 – 3.92 (m, 2H), 3.53 (s, 3H), 1.52 (s, 9H), 0.85 (t,  $J$  = 7.1 Hz, 3H).

$^{13}\text{C}$  NMR (101 MHz,  $\text{CDCl}_3$ )  $\delta$  166.8, 157.4, 154.0, 138.7, 136.4, 131.4, 129.0, 128.6, 128.3, 127.9, 127.7, 127.5, 126.6, 126.2, 125.9, 123.4, 123.3, 117.7, 117.0, 108.6, 98.3, 88.2, 59.2, 55.2, 46.6, 28.4, 14.3, 13.8.

HPLC (IC, ethanol/n-hexane = 40/60, flow rate = 1.0 mL/min,  $\lambda$  = 254 nm)  $t_{\text{R}}$  = 3.94 min (major), 5.51 (minor).

HRMS (ESI)  $m/z$   $[\text{M}+\text{H}]^+$  Calcd. for  $\text{C}_{36}\text{H}_{37}\text{N}_2\text{O}_7$ : 609.2597; found: 609.2613.

**Ethyl (R)-1-benzyl-5-((tert-butoxycarbonyl)amino)-5-(1-hydroxy-4-methylnaphthalen-2-yl)-4-oxo-2-phenyl-4,5-dihydro-1H-pyrrole-3-carboxylate (3ac)**

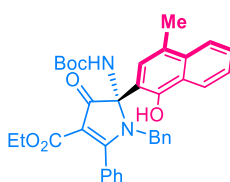

It was purified by flash chromatography (petroleum ether/EtOAc = 4:1) as white solid (51.9 mg, 88% yield); 97% *ee*;  $[\alpha]_{\text{D}}^{20}$  = -692.1 (*c* 1.30,  $\text{CH}_2\text{Cl}_2$ ); m.p. 119.5 – 120.3 °C.

$^1\text{H}$  NMR (400 MHz,  $\text{CDCl}_3$ )  $\delta$  10.39 (s, 1H), 8.43 (d,  $J$  = 7.8 Hz, 1H), 7.86 (d,  $J$  = 8.1 Hz, 1H), 7.73 – 7.30 (m, 7H), 7.22 – 7.10 (m, 3H), 7.09 – 6.76 (m, 3H), 5.91 (s, 1H), 4.89 (d,  $J$  = 15.7 Hz, 1H), 4.61 (d,  $J$  = 15.5 Hz, 1H), 4.08 – 3.90 (m, 2H), 2.60 (s, 3H), 1.39 (s, 9H), 1.04 (t,  $J$  = 7.1 Hz, 3H).

$^{13}\text{C}$  NMR (101 MHz,  $\text{CDCl}_3$ )  $\delta$  196.6, 180.5, 162.8, 153.4, 152.7, 135.4, 133.9, 130.7, 130.5, 128.6, 128.5, 128.1, 128.1, 127.8, 127.6, 126.6, 125.8, 123.8, 123.7, 122.0, 112.7, 101.0, 82.9, 81.6, 59.7, 48.9, 28.3, 19.6, 14.2.

HPLC (IA, ethanol/n-hexane = 20/80, flow rate = 1.0 mL/min,  $\lambda$  = 254 nm)  $t_{\text{R}}$  = 5.41 min (major), 9.68 (minor).

HRMS (ESI)  $m/z$   $[\text{M}+\text{H}]^+$  Calcd. for  $\text{C}_{36}\text{H}_{37}\text{N}_2\text{O}_6$ : 593.2646; found: 593.2657.

**Ethyl (R)-1-benzyl-5-((tert-butoxycarbonyl)amino)-5-(1-hydroxy-4-methoxynaphthalen-2-yl)-4-oxo-2-phenyl-4,5-dihydro-1H-pyrrole-3-carboxylate (3ad)**

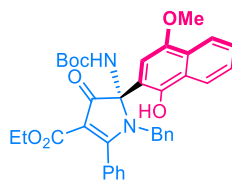

It was purified by flash chromatography (petroleum ether/EtOAc = 4:1) as white solid (52.8 mg, 87% yield); 97% *ee*;  $[\alpha]_D^{20} = -715.8$  (*c* 1.32, CH<sub>2</sub>Cl<sub>2</sub>); m.p. 181.2 – 182.2 °C.

**<sup>1</sup>H NMR (400 MHz, CDCl<sub>3</sub>)** δ 10.04 (s, 1H), 8.35 (s, 1H), 8.21 – 8.04 (m, 1H), 7.73 – 7.29 (m, 7H), 7.22 – 7.10 (m, 3H), 7.08 – 6.77 (m, 2H), 6.40 (s, 1H), 6.15 – 5.70 (m, 1H), 4.86 (d, *J* = 15.5 Hz, 1H), 4.62 (d, *J* = 15.6 Hz, 1H), 4.17 – 3.97 (m, 2H), 3.90 (s, 3H), 1.40 (s, 9H), 1.05 (t, *J* = 6.9 Hz, 3H).

**<sup>13</sup>C NMR (101 MHz, CDCl<sub>3</sub>)** δ 196.6, 180.6, 162.8, 153.5, 149.7, 147.8, 135.4, 130.8, 130.5, 128.8, 128.7, 128.5, 128.3, 127.9, 127.2, 126.9, 126.7, 123.0, 121.6, 112.6, 101.2, 100.0, 82.9, 81.6, 59.7, 55.8, 48.9, 28.3, 14.2.

**HPLC** (IA, ethanol/n-hexane = 20/80, flow rate = 1.0 mL/min, λ = 254 nm) *t<sub>R</sub>* = 5.84 min (major), 8.95 (minor).

**HRMS (ESI)** *m/z* [M+H]<sup>+</sup> Calcd. for C<sub>36</sub>H<sub>37</sub>N<sub>2</sub>O<sub>7</sub>: 609.2595; found: 609.2615.

**Ethyl (R)-1-benzyl-5-((tert-butoxycarbonyl)amino)-5-(4-fluoro-1-hydroxynaphthalen-2-yl)-4-oxo-2-phenyl-4,5-dihydro-1H-pyrrole-3-carboxylate (3ae)**

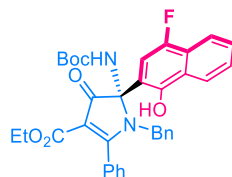

It was purified by flash chromatography (petroleum ether/EtOAc = 4:1) as white solid (47.2 mg, 79% yield); 96% *ee*;  $[\alpha]_D^{20} = -727.5$  (*c* 1.18, CH<sub>2</sub>Cl<sub>2</sub>); m.p. 120.7 – 121.3 °C.

**<sup>1</sup>H NMR (400 MHz, CDCl<sub>3</sub>)** δ 10.48 (s, 1H), 8.37 (d, *J* = 6.7 Hz, 1H), 8.02 – 7.91 (m, 1H), 7.79 – 7.27 (m, 7H), 7.23 – 7.10 (m, 3H), 7.10 – 6.67 (m, 3H), 6.04 – 5.63 (m, 1H), 4.90 (d, *J* = 15.7 Hz, 1H), 4.62 (d, *J* = 15.6 Hz, 1H), 4.11 – 3.92 (m, 2H), 1.38 (s, 9H), 1.03 (t, *J* = 7.1 Hz, 3H).

**<sup>13</sup>C NMR (101 MHz, CDCl<sub>3</sub>)** δ 196.4, 180.8, 162.5, 153.3, 153.0 (d, *J* = 246.4 Hz, 1C), 150.4, 135.3, 130.5 (d, *J* = 11.1 Hz, 1C), 128.7 (d, *J* = 4.0 Hz, 1C), 128.5, 128.1, 128.0, 127.8, 127.1, 124.8 (d, *J* = 18.2 Hz, 1C), 123.4, 120.1 (d, *J* = 3.0 Hz, 1C), 112.6, 105.3 (d, *J* = 24.2 Hz, 1C), 101.1, 82.3, 81.8, 59.7, 48.9, 28.2, 14.2.

**<sup>19</sup>F NMR (377 MHz, CDCl<sub>3</sub>)** δ -130.9.

**HPLC** (IA, ethanol/n-hexane = 20/80, flow rate = 1.0 mL/min, λ = 254 nm) *t<sub>R</sub>* = 5.12 min (major), 7.42 (minor).

**HRMS (ESI)** *m/z* [M+H]<sup>+</sup> Calcd. for C<sub>35</sub>H<sub>34</sub>FN<sub>2</sub>O<sub>6</sub>: 597.2395; found: 597.2421.

**Ethyl (R)-1-benzyl-5-((tert-butoxycarbonyl)amino)-5-(4-chloro-1-hydroxynaphthalen-2-yl)-4-oxo-2-phenyl-4,5-dihydro-1H-pyrrole-3-carboxylate (3af)**

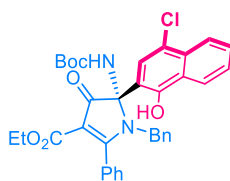

It was purified by flash chromatography (petroleum ether/EtOAc = 4:1) as white solid (49.6 mg, 81% yield); 93% *ee*;  $[\alpha]_{\text{D}}^{20} = -745.5$  (*c* 2.48, CH<sub>2</sub>Cl<sub>2</sub>); m.p. 157.6 – 158.3 °C.

**<sup>1</sup>H NMR (400 MHz, CDCl<sub>3</sub>)** δ 10.69 (s, 1H), 8.41 (d, *J* = 7.8 Hz, 1H), 8.11 (d, *J* = 8.3 Hz, 1H), 7.91 – 7.31 (m, 7H), 7.23 – 7.11 (m, 4H), 7.10 – 6.72 (m, 2H), 6.01 – 5.57 (m, 1H), 4.87 (d, *J* = 15.6 Hz, 1H), 4.60 (d, *J* = 15.4 Hz, 1H), 4.13 – 3.89 (m, 2H), 1.38 (s, 9H), 1.03 (t, *J* = 7.1 Hz, 3H).

**<sup>13</sup>C NMR (101 MHz, CDCl<sub>3</sub>)** δ 196.5, 181.0, 162.6, 153.5, 153.3, 135.1, 131.9, 130.6, 130.5, 128.9, 128.7, 128.6, 128.2, 128.0, 126.8, 124.1, 123.7, 123.6, 121.9, 113.6, 101.1, 82.3, 81.9, 59.8, 48.9, 28.3, 14.2.

**HPLC** (IA, ethanol/n-hexane = 20/80, flow rate = 1.0 mL/min, λ = 254 nm) *t<sub>R</sub>* = 5.01 min (major), 6.50 (minor).

**HRMS (ESI)** *m/z* [M+Na]<sup>+</sup> Calcd. for C<sub>35</sub>H<sub>33</sub>ClN<sub>2</sub>O<sub>6</sub>Na: 635.1919; found: 635.1931.

**Ethyl (*R*)-1-benzyl-5-(4-bromo-1-hydroxynaphthalen-2-yl)-5-((*tert*-butoxycarbonyl)amino)-4-oxo-2-phenyl-4,5-dihydro-1*H*-pyrrole-3-carboxylate (3ag)**

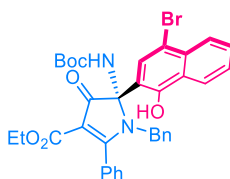

It was purified by flash chromatography (petroleum ether/EtOAc = 4:1) as white solid (51.5 mg, 78% yield); 94% *ee*;  $[\alpha]_{\text{D}}^{20} = -631.9$  (*c* 1.29, CH<sub>2</sub>Cl<sub>2</sub>); m.p. 123.1 – 123.8 °C.

**<sup>1</sup>H NMR (400 MHz, CDCl<sub>3</sub>)** δ 10.71 (s, 1H), 8.39 (d, *J* = 7.4 Hz, 1H), 8.06 (d, *J* = 8.3 Hz, 1H), 7.80 – 7.29 (m, 8H), 7.21 – 7.11 (m, 3H), 7.10 – 6.74 (m, 2H), 5.91 (s, 1H), 4.86 (d, *J* = 15.6 Hz, 1H), 4.60 (d, *J* = 15.4 Hz, 1H), 4.13 – 3.88 (m, 2H), 1.39 (s, 9H), 1.03 (t, *J* = 7.1 Hz, 3H).

**<sup>13</sup>C NMR (101 MHz, CDCl<sub>3</sub>)** δ 196.6, 181.0, 162.6, 154.1, 153.2, 135.0, 133.1, 130.6, 130.5, 129.1, 128.9, 128.7, 128.6, 128.2, 128.0, 126.8, 126.7, 125.5, 123.7, 114.1, 113.5, 101.2, 82.2, 81.9, 59.8, 48.8, 28.3, 14.2.

**HPLC** (IA, ethanol/n-hexane = 20/80, flow rate = 1.0 mL/min, λ = 254 nm) *t<sub>R</sub>* = 5.12 min (major), 6.52 (minor).

**HRMS (ESI)** *m/z* [M+H]<sup>+</sup> Calcd. for C<sub>35</sub>H<sub>34</sub>BrN<sub>2</sub>O<sub>6</sub>: 657.1595, 659.1581; found: 657.1608, 659.1593.

**Ethyl (*R*)-1-benzyl-5-((*tert*-butoxycarbonyl)amino)-5-(1-hydroxy-6-methoxynaphthalen-2-yl)-4-oxo-2-phenyl-4,5-dihydro-1*H*-pyrrole-3-carboxylate (3ah)**

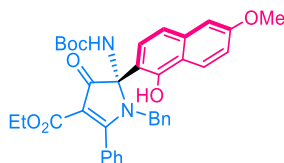

It was purified by flash chromatography (petroleum ether/EtOAc = 4:1) as white solid (51.0 mg, 84% yield); 98% *ee*;  $[\alpha]_{\text{D}}^{20} = -666.9$  (*c* 1.27, CH<sub>2</sub>Cl<sub>2</sub>); m.p. 128.9 – 129.5 °C.



**<sup>1</sup>H NMR (400 MHz, CDCl<sub>3</sub>)** δ 10.60 (s, 1H), 8.28 (d, *J* = 9.0 Hz, 1H), 7.46 (s, 5H), 7.25 – 6.67 (m, 9H), 5.91 (s, 1H), 4.93 (d, *J* = 15.7 Hz, 1H), 4.62 (d, *J* = 15.8 Hz, 1H), 4.16 – 3.96 (m, 2H), 3.92 (s, 3H), 1.36 (s, 9H), 1.04 (t, *J* = 6.9 Hz, 3H).

**<sup>13</sup>C NMR (101 MHz, CDCl<sub>3</sub>)** δ 196.7, 180.4, 162.8, 159.2, 154.6, 153.3, 136.7, 135.6, 130.6, 130.4, 128.5, 127.9, 127.6, 125.1, 123.1, 122.3, 119.4, 118.5, 111.5, 105.3, 100.8, 82.9, 81.5, 59.6, 55.4, 48.9, 28.3, 14.2.

**HPLC** (IC, ethanol/n-hexane = 40/60, flow rate = 1.0 mL/min, λ = 254 nm) *t<sub>R</sub>* = 4.21 min (major), 18.75 (minor).

**HRMS (ESI)** *m/z* [M+H]<sup>+</sup> Calcd. for C<sub>36</sub>H<sub>37</sub>N<sub>2</sub>O<sub>7</sub>: 609.2595; found: 609.2616.

**Ethyl (*R*)-1-benzyl-5-((*tert*-butoxycarbonyl)amino)-5-(6-fluoro-1-hydroxynaphthalen-2-yl)-4-oxo-2-phenyl-4,5-dihydro-1*H*-pyrrole-3-carboxylate (3ai)**

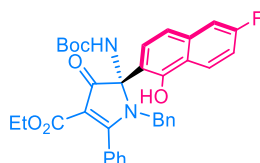

It was purified by flash chromatography (petroleum ether/EtOAc = 4:1) as white solid (50.4 mg, 85% yield); 96% *ee*; [α]<sub>D</sub><sup>20</sup> = -699.0 (*c* 1.26, CH<sub>2</sub>Cl<sub>2</sub>); m.p. 126.4 – 127.2 °C.

**<sup>1</sup>H NMR (400 MHz, CDCl<sub>3</sub>)** δ 10.76 (s, 1H), 8.39 (s, 1H), 7.84 – 7.20 (m, 8H), 7.19 – 6.62 (m, 6H), 6.12 – 5.30 (m, 1H), 4.92 (d, *J* = 15.7 Hz, 1H), 4.77 – 4.17 (m, 1H), 4.00 (s, 2H), 1.36 (s, 9H), 1.02 (t, *J* = 7.0 Hz, 3H).

**<sup>13</sup>C NMR (101 MHz, CDCl<sub>3</sub>)** δ 196.7, 180.6, 162.6, 162.1 (d, *J* = 248.5 Hz, 1C), 154.8, 153.3, 136.2 (d, *J* = 9.1 Hz, 1C), 135.5, 130.5, 128.5, 127.9, 127.7, 126.3 (d, *J* = 9.1 Hz, 1C), 124.9, 123.0, 119.7 (d, *J* = 5.0 Hz, 1C), 116.2 (d, *J* = 24.2 Hz, 1C), 112.9, 110.3 (d, *J* = 21.2 Hz, 1C), 100.9, 82.8, 81.6, 59.7, 48.9, 28.2, 14.2.

**<sup>19</sup>F NMR (377 MHz, CDCl<sub>3</sub>)** δ -112.6.

**HPLC** (IC, ethanol/n-hexane = 40/60, flow rate = 1.0 mL/min, λ = 254 nm) *t<sub>R</sub>* = 3.52 min (major), 6.04 (minor).

**HRMS (ESI)** *m/z* [M+Na]<sup>+</sup> Calcd. for C<sub>35</sub>H<sub>33</sub>FN<sub>2</sub>O<sub>6</sub>: 619.2215; found: 619.2229.

**Ethyl (*R*)-1-benzyl-5-(6-bromo-1-hydroxynaphthalen-2-yl)-5-((*tert*-butoxycarbonyl)amino)-4-oxo-2-phenyl-4,5-dihydro-1*H*-pyrrole-3-carboxylate (3aj)**

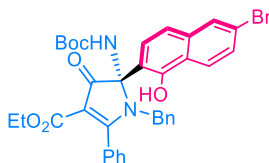

It was purified by flash chromatography (petroleum ether/EtOAc = 4:1) as white solid (53.4 mg, 81% yield); 96% *ee*; [α]<sub>D</sub><sup>20</sup> = -629.3 (*c* 1.33, CH<sub>2</sub>Cl<sub>2</sub>); m.p. 127.4 – 127.9 °C.

**<sup>1</sup>H NMR (400 MHz, CDCl<sub>3</sub>)** δ 10.80 (s, 1H), 8.24 (d, *J* = 8.5 Hz, 1H), 7.88 (s, 1H), 7.72 – 7.31 (m, 6H), 7.26 – 6.62 (m, 7H), 6.02 – 5.39 (m, 1H), 4.91 (d, *J* = 15.7 Hz, 1H), 4.76 – 4.20 (m, 1H), 4.00 (s, 2H), 1.36 (s, 9H), 1.02 (t, *J* = 7.0 Hz, 3H).

**<sup>13</sup>C NMR (101 MHz, CDCl<sub>3</sub>)** δ 196.6, 180.7, 162.6, 154.7, 153.3, 136.1, 135.4, 130.5, 129.4, 129.2, 128.5, 127.9, 127.8, 126.4, 125.3, 122.9, 122.3, 119.4, 114.0, 100.9, 82.8, 81.7, 59.7, 49.0, 28.2, 14.2.

HPLC (IC, ethanol/n-hexane = 20/80, flow rate = 1.0 mL/min,  $\lambda$  = 254 nm)  $t_R$  = 5.11 min (major), 20.08 (minor).

HRMS (ESI)  $m/z$   $[M+H]^+$  Calcd. for  $C_{35}H_{34}BrN_2O_6$ : 657.1595, 659.1581; found: 657.1611, 659.1594.

**Ethyl (R)-1-benzyl-5-((tert-butoxycarbonyl)amino)-5-(1-hydroxy-7-methoxynaphthalen-2-yl)-4-oxo-2-phenyl-4,5-dihydro-1H-pyrrole-3-carboxylate (3ak)**

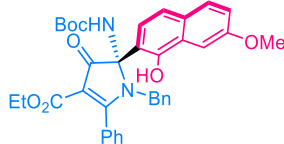

It was purified by flash chromatography (petroleum ether/EtOAc = 4:1) as white solid (48.2 mg, 79% yield); 97% *ee*;  $[\alpha]_D^{20}$  = -716.3 (*c* 1.20,  $CH_2Cl_2$ ); m.p. 126.0 – 126.7 °C.

$^1H$  NMR (400 MHz,  $CDCl_3$ )  $\delta$  10.64 (s, 1H), 7.75 – 7.22 (m, 8H), 7.19 – 6.67 (m, 7H), 6.11 – 5.23 (m, 1H), 5.01 – 4.78 (m, 1H), 4.73 – 4.13 (m, 1H), 4.12 – 3.96 (m, 2H), 3.90 (s, 3H), 1.37 (s, 9H), 1.03 (t, *J* = 6.8 Hz, 3H).

$^{13}C$  NMR (101 MHz,  $CDCl_3$ )  $\delta$  196.6, 180.4, 162.7, 158.0, 153.3, 153.2, 135.7, 130.6, 130.5, 130.4, 129.0, 128.7, 128.5, 127.9, 127.6, 120.8, 120.3, 119.1, 114.1, 101.0, 100.8, 83.0, 81.5, 77.5, 77.2, 76.8, 59.6, 55.5, 49.0, 28.3.

HPLC (IC, ethanol/n-hexane = 40/60, flow rate = 1.0 mL/min,  $\lambda$  = 254 nm)  $t_R$  = 4.03 min (major), 7.67 (minor).

HRMS (ESI)  $m/z$   $[M+H]^+$  Calcd. for  $C_{36}H_{37}N_2O_7$ : 609.2595; found: 609.2619.

**Ethyl (R)-1-benzyl-5-(7-bromo-1-hydroxynaphthalen-2-yl)-5-((tert-butoxycarbonyl)amino)-4-oxo-2-phenyl-4,5-dihydro-1H-pyrrole-3-carboxylate (3al)**

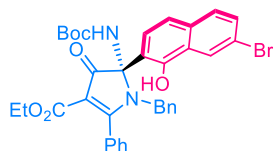

It was purified by flash chromatography (petroleum ether/EtOAc = 4:1) as white solid (50.2 mg, 76% yield); 96% *ee*;  $[\alpha]_D^{20}$  = -726.1 (*c* 1.25,  $CH_2Cl_2$ ); m.p. 139.6 – 140.1 °C.

$^1H$  NMR (400 MHz,  $CDCl_3$ )  $\delta$  10.84 (s, 1H), 8.52 (s, 1H), 7.65 – 7.27 (m, 8H), 7.19 – 6.70 (m, 6H), 6.09 – 5.49 (m, 1H), 4.93 (d, *J* = 15.7 Hz, 1H), 4.73 – 4.32 (m, 1H), 4.08 – 3.90 (m, 2H), 1.37 (s, 9H), 1.03 (t, *J* = 6.9 Hz, 3H).

$^{13}C$  NMR (101 MHz,  $CDCl_3$ )  $\delta$  196.6, 180.7, 162.6, 153.6, 153.3, 135.4, 133.3, 131.1, 130.5, 130.5, 128.9, 128.8, 128.5, 127.9, 127.8, 125.7, 122.1, 120.3, 114.6, 100.9, 82.8, 81.7, 59.7, 49.0, 28.3, 14.2.

HPLC (IC, ethanol/n-hexane = 20/80, flow rate = 1.0 mL/min,  $\lambda$  = 254 nm)  $t_R$  = 5.58 min (major), 10.08 (minor).

HRMS (ESI)  $m/z$   $[M+H]^+$  Calcd. for  $C_{35}H_{34}BrN_2O_6$ : 657.1595, 659.1581; found: 657.1612, 659.1597.

**Ethyl (R)-1-benzyl-5-(8-bromo-1-hydroxynaphthalen-2-yl)-5-((tert-butoxycarbonyl)amino)-4-oxo-2-phenyl-4,5-dihydro-1H-pyrrole-3-carboxylate (3am)**

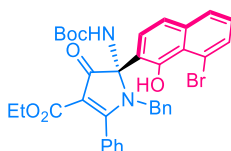

It was purified by flash chromatography (petroleum ether/EtOAc = 4:1) as white solid (43.6 mg, 66% yield); 98% *ee*;  $[\alpha]_D^{20} = -704.5$  (*c* 1.09, CH<sub>2</sub>Cl<sub>2</sub>); m.p. 122.1 – 122.9 °C.

<sup>1</sup>H NMR (400 MHz, CDCl<sub>3</sub>) δ 10.73 (s, 1H), 7.78 (d, *J* = 6.3 Hz, 1H), 7.72 – 7.20 (m, 8H), 7.18 – 6.62 (m, 6H), 6.28 – 5.33 (m, 1H), 4.87 (d, *J* = 15.6 Hz, 1H), 4.71 – 4.22 (m, 1H), 4.01 (d, *J* = 6.6 Hz, 2H), 1.37 (s, 9H), 1.04 (t, *J* = 7.1 Hz, 3H).

<sup>13</sup>C NMR (101 MHz, CDCl<sub>3</sub>) δ 196.5, 180.6, 162.7, 155.1, 153.3, 137.5, 135.4, 133.9, 130.5, 128.6, 128.5, 128.1, 128.0, 127.8, 127.6, 125.4, 122.7, 121.2, 117.8, 115.4, 100.8, 83.0, 81.7, 59.7, 48.9, 28.3, 14.2.

HPLC (IC, ethanol/n-hexane = 40/60, flow rate = 1.0 mL/min, λ = 254 nm) *t*<sub>R</sub> = 4.05 min (major), 13.79 (minor).

HRMS (ESI) *m/z* [M+H]<sup>+</sup> Calcd. for C<sub>35</sub>H<sub>34</sub>BrN<sub>2</sub>O<sub>6</sub>: 657.1595, 659.1581; found: 657.1609, 659.1595.

**Ethyl (R)-1-benzyl-5-((tert-butoxycarbonyl)amino)-5-(4-hydroxyphenanthren-3-yl)-4-oxo-2-phenyl-4,5-dihydro-1H-pyrrole-3-carboxylate (3an)**

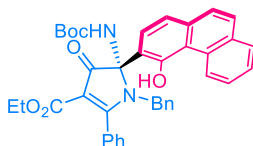

It was purified by flash chromatography (petroleum ether/EtOAc = 4:1) as white solid (53.5 mg, 85% yield); 96% *ee*;  $[\alpha]_D^{20} = -589.9$  (*c* 0.89, CH<sub>2</sub>Cl<sub>2</sub>); m.p. 138.7 – 139.5 °C.

<sup>1</sup>H NMR (400 MHz, Chloroform-*d*) δ 11.35 (d, *J* = 22.3 Hz, 1H), 9.97 (d, *J* = 8.4 Hz, 1H), 7.94 – 7.83 (m, 1H), 7.76 (d, *J* = 8.1 Hz, 1H), 7.72 – 7.32 (m, 9H), 7.25 – 6.71 (m, 6H), 5.85 (s, 1H), 4.93 (d, *J* = 15.7 Hz, 1H), 4.68 – 4.30 (m, 1H), 4.15 – 3.88 (m, 2H), 1.40 (s, 9H), 1.04 (t, *J* = 6.6 Hz, 3H).

<sup>13</sup>C NMR (101 MHz, CDCl<sub>3</sub>) δ 197.1, 180.7, 162.7, 157.6, 153.5, 135.8, 135.5, 132.9, 130.8, 130.6, 130.5, 129.7, 129.4, 128.6, 128.5, 128.4, 128.0, 127.7, 127.0, 126.5, 126.3, 123.5, 122.4, 121.1, 116.9, 100.7, 83.5, 81.7, 59.7, 48.9, 28.3, 14.2.

HPLC (IC, ethanol/n-hexane = 30/70, flow rate = 1.0 mL/min, λ = 254 nm) *t*<sub>R</sub> = 5.99 min (major), 12.04 (minor).

HRMS (ESI) *m/z* [M+H]<sup>+</sup> Calcd. for C<sub>39</sub>H<sub>37</sub>N<sub>2</sub>O<sub>6</sub>: 629.2646; found: 629.2644.

**Ethyl (R)-1-benzyl-5-((tert-butoxycarbonyl)amino)-5-(4-hydroxy-1-methyl-1H-indol-5-yl)-4-oxo-2-phenyl-4,5-dihydro-1H-pyrrole-3-carboxylate (3ao)**

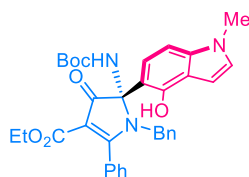

It was purified by flash chromatography (petroleum ether/EtOAc = 4:1) as white solid (46.8 mg, 80% yield); 96% *ee*;  $[\alpha]_D^{20} = -476.3$  (*c* 0.78, CH<sub>2</sub>Cl<sub>2</sub>); m.p. 140.8 – 141.3 °C.

$^1\text{H NMR}$  (400 MHz,  $\text{CDCl}_3$ )  $\delta$  10.22 (s, 1H), 7.72 – 7.28 (m, 5H), 7.22 – 7.09 (m, 3H), 7.08 – 6.75 (m, 5H), 6.69 (s, 1H), 5.67 (s, 1H), 4.92 (d,  $J = 15.8$  Hz, 1H), 4.64 (d,  $J = 15.8$  Hz, 1H), 4.11 – 3.93 (m, 2H), 3.75 (s, 3H), 1.35 (s, 9H), 1.05 (t,  $J = 6.9$  Hz, 3H).

$^{13}\text{C NMR}$  (101 MHz,  $\text{CDCl}_3$ )  $\delta$  196.9, 180.0, 163.0, 153.4, 151.4, 139.1, 135.9, 130.8, 130.2, 128.7, 128.4, 127.8, 127.5, 122.4, 118.4, 109.0, 102.5, 100.5, 99.6, 83.1, 81.3, 59.5, 48.8, 33.1, 28.3, 14.3.

**HPLC** (IC, ethanol/n-hexane = 30/70, flow rate = 1.0 mL/min,  $\lambda = 254$  nm)  $t_{\text{R}} = 13.45$  min (major), 38.81 (minor).

**HRMS (ESI)**  $m/z$   $[\text{M}+\text{H}]^+$  Calcd. for  $\text{C}_{34}\text{H}_{36}\text{N}_3\text{O}_6$ : 582.2599; found: 582.2595.

**Ethyl (*R*)-1-benzyl-5-((*tert*-butoxycarbonyl)amino)-5-(4-hydroxybenzo[*b*]thiophen-5-yl)-4-oxo-2-phenyl-4,5-dihydro-1*H*-pyrrole-3-carboxylate (3ap)**

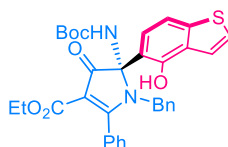

It was purified by flash chromatography (petroleum ether/EtOAc = 4:1) as white solid (46.0 mg, 79% yield); 94% *ee*;  $[\alpha]_{\text{D}}^{20} = -341.6$  ( $c$  0.77,  $\text{CH}_2\text{Cl}_2$ ); m.p. 132.4 – 132.9 °C.

$^1\text{H NMR}$  (400 MHz,  $\text{CDCl}_3$ )  $\delta$  10.57 (s, 1H), 7.66 – 7.31 (m, 8H), 7.22 – 7.09 (m, 3H), 7.09 – 6.71 (m, 3H), 5.64 (s, 1H), 4.92 (d,  $J = 15.8$  Hz, 1H), 4.62 (d,  $J = 15.8$  Hz, 1H), 4.11 – 3.91 (m, 2H), 1.36 (s, 9H), 1.04 (t,  $J = 6.9$  Hz, 3H).

$^{13}\text{C NMR}$  (101 MHz,  $\text{CDCl}_3$ )  $\delta$  196.7, 180.5, 162.7, 153.2, 153.1, 143.0, 135.6, 134.1, 130.5, 130.4, 128.5, 127.9, 127.7, 126.1, 121.5, 121.0, 114.9, 114.2, 100.8, 82.8, 81.6, 59.7, 48.9, 28.3, 14.2.

**HPLC** (IC, ethanol/n-hexane = 30/70, flow rate = 1.0 mL/min,  $\lambda = 254$  nm)  $t_{\text{R}} = 5.84$  min (major), 12.02 (minor).

**HRMS (ESI)**  $m/z$   $[\text{M}+\text{H}]^+$  Calcd. for  $\text{C}_{33}\text{H}_{33}\text{N}_2\text{O}_6\text{S}$ : 585.2054; found: 585.2052.

**Ethyl (*R*)-1-benzyl-5-((*tert*-butoxycarbonyl)amino)-5-(5-hydroxybenzo[*d*][1,3]dioxol-4-yl)-4-oxo-2-phenyl-4,5-dihydro-1*H*-pyrrole-3-carboxylate (3aq)**

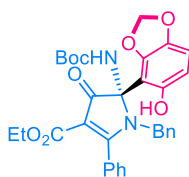

It was purified by flash chromatography (petroleum ether/EtOAc = 4:1) as white solid (46.8 mg, 82% yield); 85% *ee*;  $[\alpha]_{\text{D}}^{20} = -346.1$  ( $c$  0.78,  $\text{CH}_2\text{Cl}_2$ ); m.p. 131.4 – 132.1 °C.

$^1\text{H NMR}$  (400 MHz,  $\text{CDCl}_3$ )  $\delta$  9.77 (s, 1H), 7.91 – 7.26 (m, 5H), 7.21 – 7.08 (m, 3H), 6.93 (s, 2H), 6.59 (s, 1H), 6.50 (s, 1H), 5.94 (dd,  $J = 15.9, 1.4$  Hz, 2H), 5.84 (s, 1H), 4.79 (d,  $J = 15.8$  Hz, 1H), 4.53 (d,  $J = 15.7$  Hz, 1H), 4.10 – 3.90 (m, 2H), 1.34 (s, 9H), 1.03 (t,  $J = 7.1$  Hz, 3H).

$^{13}\text{C NMR}$  (101 MHz,  $\text{CDCl}_3$ )  $\delta$  196.6, 180.4, 162.7, 153.3, 153.1, 149.6, 142.1, 135.5, 130.5, 128.5, 127.8, 127.7, 112.0, 104.3, 103.3, 101.8, 100.8, 82.3, 81.6, 59.6, 48.7, 28.2, 14.2.

**HPLC** (IC, ethanol/n-hexane = 30/70, flow rate = 1.0 mL/min,  $\lambda = 254$  nm)  $t_{\text{R}} = 9.42$  min (major), 15.72 (minor).

**HRMS (ESI)**  $m/z$   $[\text{M}+\text{H}]^+$  Calcd. for  $\text{C}_{32}\text{H}_{33}\text{N}_2\text{O}_8$ : 573.2231; found: 573.2231.

#### 4. Scale-up experiment

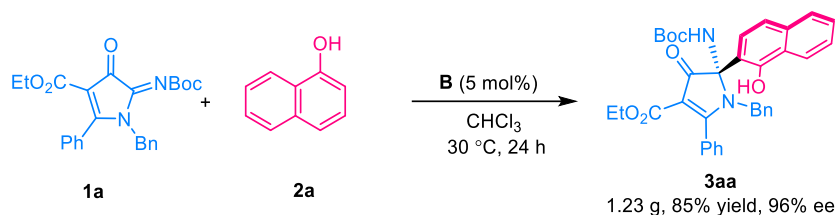

To an ordinary vial charged with a magnetic stirring bar were added **1a** (1.086 g, 2.5 mmol), **2a** (0.540 g, 3.75 mmol), catalyst **B** (87.5 mg), and  $\text{CHCl}_3$  (25 mL). Then the mixture was stirred at 30 °C for 24 h. Product **3aa** was isolated by flash chromatography on silica gel as a solid (1.23 g, 85% yield, 96% *ee*).

#### 5. Procedure for the synthesis of product 4

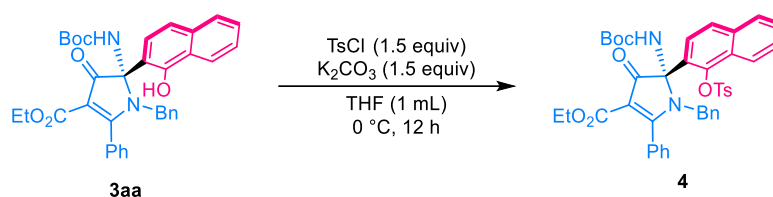

The compound **3aa** (57.8 mg, 0.1 mmol, 1.0 equiv) was suspended in THF (1 mL) and then cooled to 0 °C. Then  $\text{K}_2\text{CO}_3$  (1.5 equiv, 20.7 mg, 0.15 mmol), TsCl (1.5 equiv, 28.5 mg, 0.15 mmol) was added slowly and the solution was stirred for 12 h at 0 °C. The reaction was quenched with  $\text{H}_2\text{O}$  and extracted with EA (10 mL  $\times$  3), dried over anhydrous sodium sulfate and concentrated in vacuo. The residue was purified by chromatography over silica gel eluting with PE/EA to provide the desired product **4**.

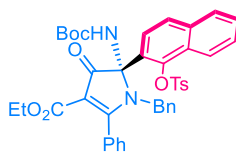

#### Ethyl (*R*)-1-benzyl-5-((*tert*-butoxycarbonyl)amino)-4-oxo-2-phenyl-5-(1-(tosyloxy)naphthalen-2-yl)-4,5-dihydro-1*H*-pyrrole-3-carboxylate (**4**)

It was purified by flash chromatography (petroleum ether/EtOAc = 1:1) as white solid (66.8 mg, 91% yield); 96% *ee*;  $[\alpha]_{\text{D}}^{20} = -124.7$  (*c* 1.11,  $\text{CH}_2\text{Cl}_2$ ); m.p. 201.5 – 201.8 °C.

**$^1\text{H}$  NMR (400 MHz,  $\text{CDCl}_3$ )**  $\delta$  8.3 – 7.9 (m, 3H), 7.7 (dd, *J* = 23.8, 8.5 Hz, 3H), 7.6 – 7.3 (m, 10H), 7.1 – 7.0 (m, 3H), 7.0 – 6.8 (m, 2H), 4.7 – 4.4 (m, 2H), 4.1 – 3.8 (m, 2H), 2.5 (s, 3H), 1.4 (s, 9H), 1.0 (t, *J* = 7.1 Hz, 3H).

**$^{13}\text{C}$  NMR (101 MHz,  $\text{CDCl}_3$ )**  $\delta$  163.3, 153.2, 146.1, 143.7, 135.8, 135.0, 132.6, 131.4, 130.2, 130.0, 129.1, 128.4, 128.3, 128.2, 127.8, 127.5, 127.1, 126.7, 124.5, 124.1, 123.8, 81.7, 80.6, 59.4, 48.3, 28.4, 22.0, 14.2.

**HPLC** (IC, ethanol/*n*-hexane = 30/70, flow rate = 1.0 mL/min,  $\lambda$  = 254 nm)  $t_{\text{R}}$  = 9.80 min (major), 27.4 (minor).

**HRMS (ESI)** *m/z* [*M*+*H*]<sup>+</sup> Calcd. for  $\text{C}_{42}\text{H}_{41}\text{N}_2\text{O}_8\text{S}$ : 733.2578; found: 733.2578.

#### 6. Procedure for the synthesis of product 5

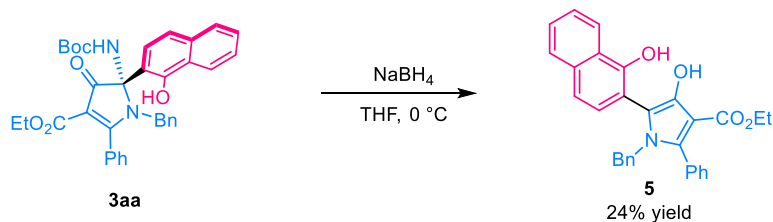

To the substrate **3aa** (173.7 mg, 0.3 mmol) in a dry reactor was added anhydrous THF (3.0 mL), and the mixture was stirred at 0 °C for 10 min. Then NaBH<sub>4</sub> (56.8 mg, 1.5 mmol) was added in one portion. Upon reaction completion, water (10 mL) was added and the mixture was extracted with DCM, washed with water and brine, dried over Mg<sub>2</sub>SO<sub>4</sub>, filtered, and concentrated to afford the crude product. The product was purified by flash chromatography with PE/EA to provide the desired compound **5** in 24% yield (32.7 mg) as a white solid.

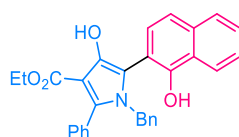

#### Ethyl 1-benzyl-4-hydroxy-5-(1-hydroxynaphthalen-2-yl)-2-phenyl-1H-pyrrole-3-carboxylate (**5**)

It was purified by flash chromatography (petroleum ether/EtOAc = 10:1) as white solid (32.7 mg, 24% yield); m.p. 49.7 – 50.4 °C.

<sup>1</sup>H NMR (400 MHz, CDCl<sub>3</sub>) δ 8.67 (s, 1H), 8.37 – 8.27 (m, 1H), 7.79 – 7.70 (m, 1H), 7.49 – 7.43 (m, 2H), 7.39 – 7.31 (m, 4H), 7.29 – 7.23 (m, 3H), 7.07 – 7.00 (m, 3H), 6.64 (s, 1H), 6.51 (dd, *J* = 7.4, 1.8 Hz, 2H), 4.98 (s, 2H), 4.12 (q, *J* = 7.1 Hz, 2H), 1.01 (t, *J* = 7.1 Hz, 3H).

<sup>13</sup>C NMR (101 MHz, CDCl<sub>3</sub>) δ 167.3, 150.3, 144.1, 137.6, 137.5, 134.4, 131.3, 130.9, 128.7, 128.4, 127.9, 127.4, 127.3, 126.8, 126.2, 125.5, 125.5, 123.1, 120.2, 111.8, 110.2, 101.8, 60.2, 48.9, 13.9.

HRMS (ESI) *m/z* [M+H]<sup>+</sup> Calcd. for C<sub>30</sub>H<sub>25</sub>NO<sub>4</sub>: 464.1856; found: 464.1872.

### 7. Procedure for the synthesis of product 6

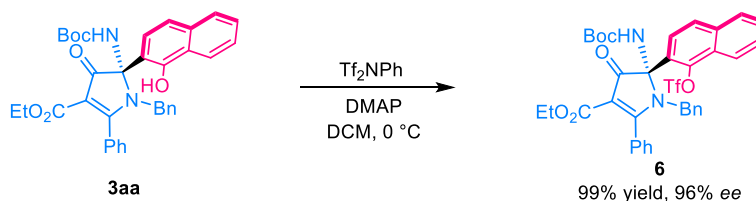

Compound **3aa** (57.9 mg, 0.1 mmol), DMAP (36.7 mg, 0.3 mmol), were successively added to a tube, followed by the addition of DCM (1 mL). Then Tf<sub>2</sub>NPh (71.5 mg, 0.2 mmol) was added in one portion. The resulting mixture was stirred at room temperature for 10 min until almost full consumption of **3aa** (monitored by thin layer chromatography), and then DCM (10 mL) was added to the reaction mixture. The organic layer was washed with water and brine, dried over Mg<sub>2</sub>SO<sub>4</sub>, filtered, and concentrated to afford the crude product. The product was purified by flash chromatography with PE/EA to provide the desired compound **6** in 99% yield (70.0 mg) as a white solid.

**Ethyl (R)-1-benzyl-5-((tert-butoxycarbonyl)amino)-4-oxo-2-phenyl-5-(1-(((trifluoromethyl)sulfonyl)oxy)naphthalen-2-yl)-4,5-dihydro-1H-pyrrole-3-carboxylate (**6**)**

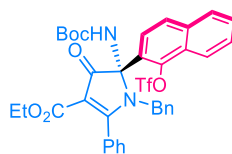

It was purified by flash chromatography (petroleum ether/EtOAc = 5:1) as white solid (70.0 mg, 99% yield); 96% *ee*;  $[\alpha]_{\text{D}}^{20} = -258.5$  (*c* 1.87, CH<sub>2</sub>Cl<sub>2</sub>); m.p. 175.1 – 175.8 °C.

**<sup>1</sup>H NMR (400 MHz, CDCl<sub>3</sub>)** δ 8.14 (d, *J* = 8.5 Hz, 1H), 7.86 – 7.76 (m, 2H), 7.66 – 7.55 (m, 2H), 7.48 (s, 5H), 7.36 (d, *J* = 8.9 Hz, 1H), 7.09 – 7.03 (m, 3H), 6.97 – 6.89 (m, 2H), 6.74 (s, 1H), 4.66 – 4.48 (m, 2H), 4.02 (q, *J* = 7.1 Hz, 2H), 1.43 (s, 9H), 1.04 (t, *J* = 7.1 Hz, 3H).

**<sup>13</sup>C NMR (101 MHz, CDCl<sub>3</sub>)** δ 190.8, 181.4, 163.2, 153.2, 142.4, 135.5, 135.2, 130.9, 130.2, 129.5, 128.7, 128.6, 128.4, 128.4, 127.9, 127.9, 127.7, 127.5, 127.2, 124.5, 123.6, 123.0, 118.8 (d, *J* = 322.2 Hz, 1C), 116.0, 101.9, 81.2, 59.6, 48.5, 28.2, 14.2.

**HPLC** (IC, ethanol/n-hexane = 30/70, flow rate = 1.0 mL/min, λ = 254 nm) *t<sub>R</sub>* = 6.50 min (major), 11.17 (minor).

**HRMS (ESI)** *m/z* [M+H]<sup>+</sup> Calcd. for C<sub>36</sub>H<sub>34</sub>F<sub>3</sub>N<sub>2</sub>O<sub>8</sub>S: 711.1982; found: 711.2006.

## 8. Crystal data

Single crystals of compound **3aj** was prepared through dissolving the sample in mixture solvent of EtOH/DCM (1/1) at room temperature and crystalizing by slow evaporation of solvent. A suitable crystal was selected for structure determination on a 'Oxford Gemini E' diffractometer. The crystal was kept at 293 K during data collection. Using Olex2<sup>1</sup>, the structure was solved with the ShelXT<sup>2</sup> structure solution program using Intrinsic Phasing and refined with the ShelXL<sup>3</sup> refinement package using Least Squares minimisation.

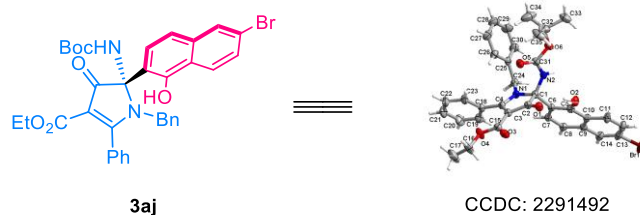

ORTEP of **3aj** (at the 50% probability level)

|                                    |                                                                 |
|------------------------------------|-----------------------------------------------------------------|
| Identification code                | <b>3aj</b>                                                      |
| Empirical formula                  | C <sub>35</sub> H <sub>33</sub> BrN <sub>2</sub> O <sub>6</sub> |
| Formula weight                     | 657.54                                                          |
| Temperature/K                      | 293(2)                                                          |
| Crystal system                     | monoclinic                                                      |
| Space group                        | P2 <sub>1</sub>                                                 |
| a/Å                                | 10.4143(4)                                                      |
| b/Å                                | 13.9129(3)                                                      |
| c/Å                                | 11.8361(2)                                                      |
| α/°                                | 90                                                              |
| β/°                                | 99.402(3)                                                       |
| γ/°                                | 90                                                              |
| Volume/Å <sup>3</sup>              | 1691.94(8)                                                      |
| Z                                  | 2                                                               |
| ρ <sub>calc</sub> /cm <sup>3</sup> | 1.291                                                           |
| μ/mm <sup>-1</sup>                 | 2.026                                                           |
| F(000)                             | 680.0                                                           |
| Crystal size/mm <sup>3</sup>       | 0.12 × 0.1 × 0.09                                               |
| Radiation                          | CuKα (λ = 1.54184)                                              |
| 2θ range for data collection/°     | 7.57 to 140.922                                                 |
| Index ranges                       | -12 ≤ h ≤ 12, -16 ≤ k ≤ 16, -14 ≤ l ≤ 8                         |
| Reflections collected              | 12241                                                           |
| Independent reflections            | 6341 [R <sub>int</sub> = 0.0263, R <sub>sigma</sub> = 0.0434]   |
| Data/restraints/parameters         | 6341/2/406                                                      |
| Goodness-of-fit on F <sup>2</sup>  | 1.044                                                           |



|                                                |                                  |
|------------------------------------------------|----------------------------------|
| Final R indexes [ $I \geq 2\sigma(I)$ ]        | $R_1 = 0.0451$ , $wR_2 = 0.1141$ |
| Final R indexes [all data]                     | $R_1 = 0.0557$ , $wR_2 = 0.1233$ |
| Largest diff. peak/hole / $e \text{ \AA}^{-3}$ | 0.23/-0.33                       |
| Flack parameter                                | -0.024(12)                       |

1. Dolomanov, O. V.; Bourhis, L. J.; Gildea, R. J, Howard, J. A. K; Puschmann, H. *J. Appl. Cryst.*, 2009, **42**, 339-341.
2. Sheldrick, G. M. *Acta Cryst.* 2015, **A71**, 3-8.
3. Sheldrick, G. M. *Acta Cryst.* 2015, **C71**, 3-8.



<sup>1</sup>H NMR (400 MHz, CDCl<sub>3</sub>) of **1b**

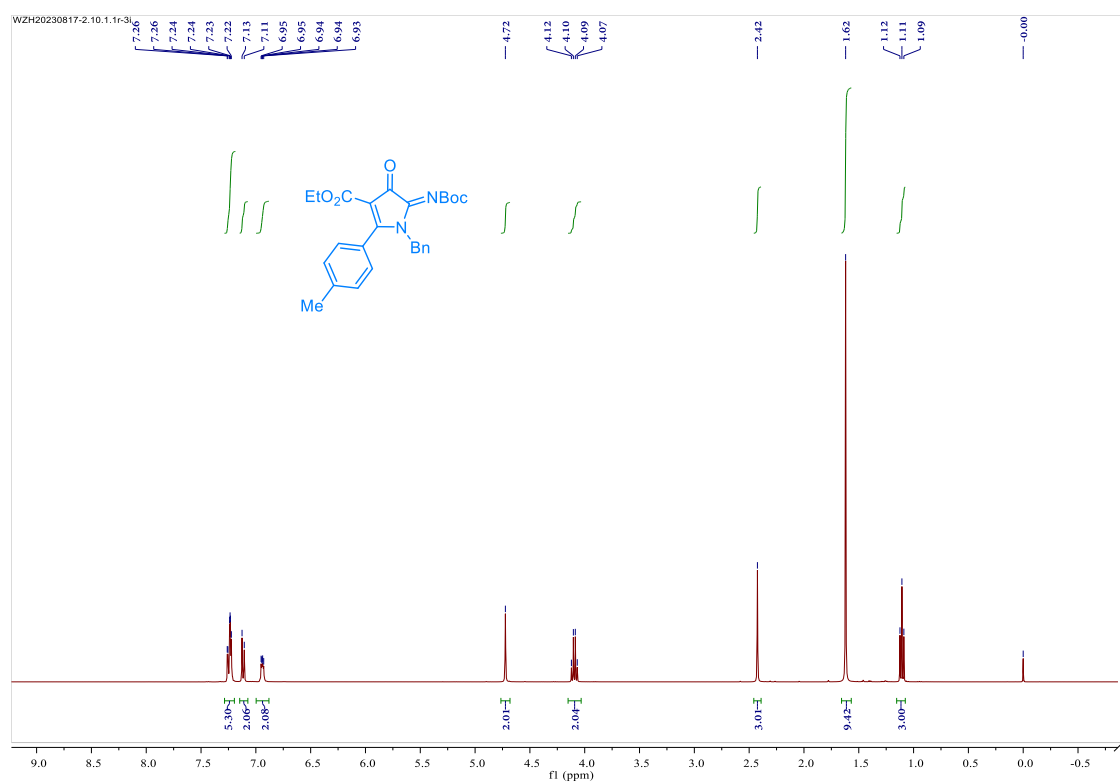

<sup>13</sup>C NMR (101 MHz, CDCl<sub>3</sub>) of **1b**

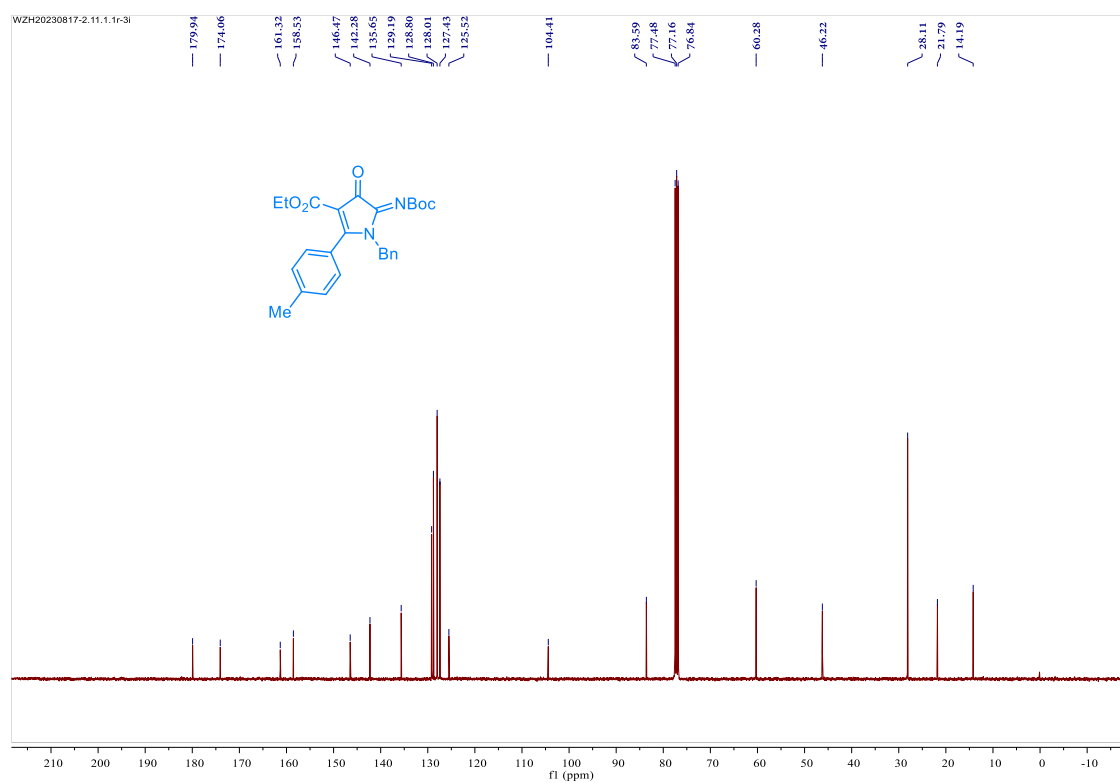

<sup>1</sup>H NMR (400 MHz, CDCl<sub>3</sub>) of **1c**

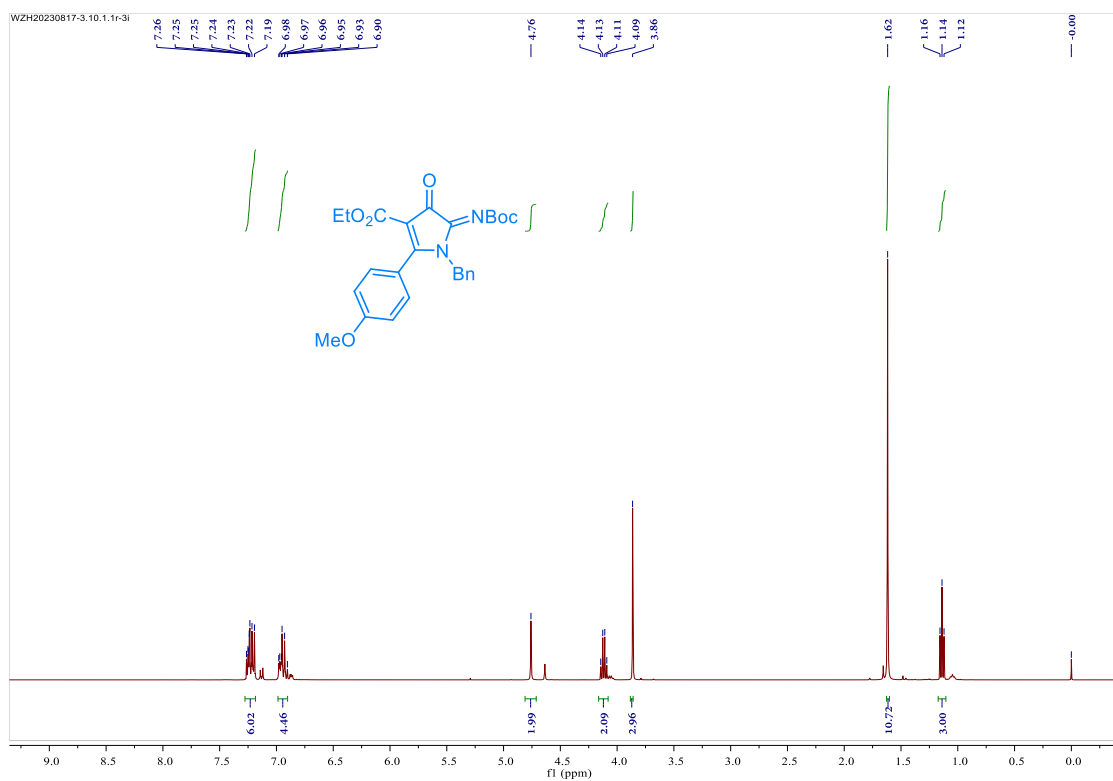

<sup>13</sup>C NMR (101 MHz, CDCl<sub>3</sub>) of **1c**

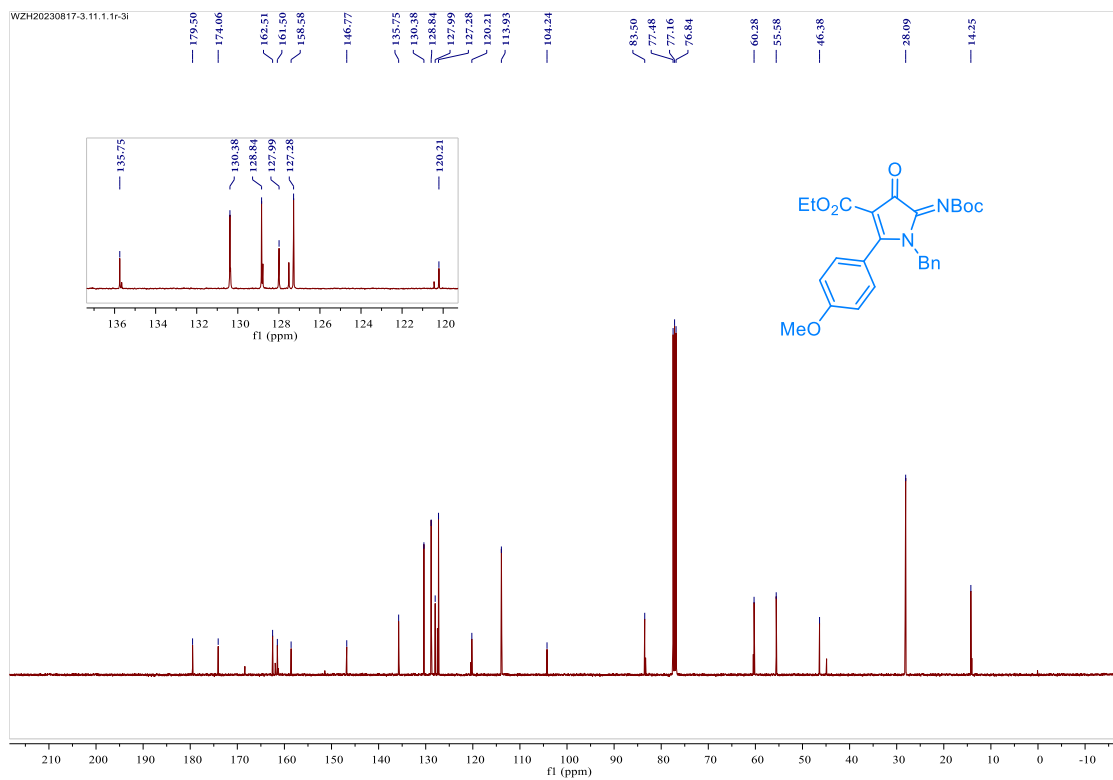

<sup>1</sup>H NMR (400 MHz, CDCl<sub>3</sub>) of **1d**

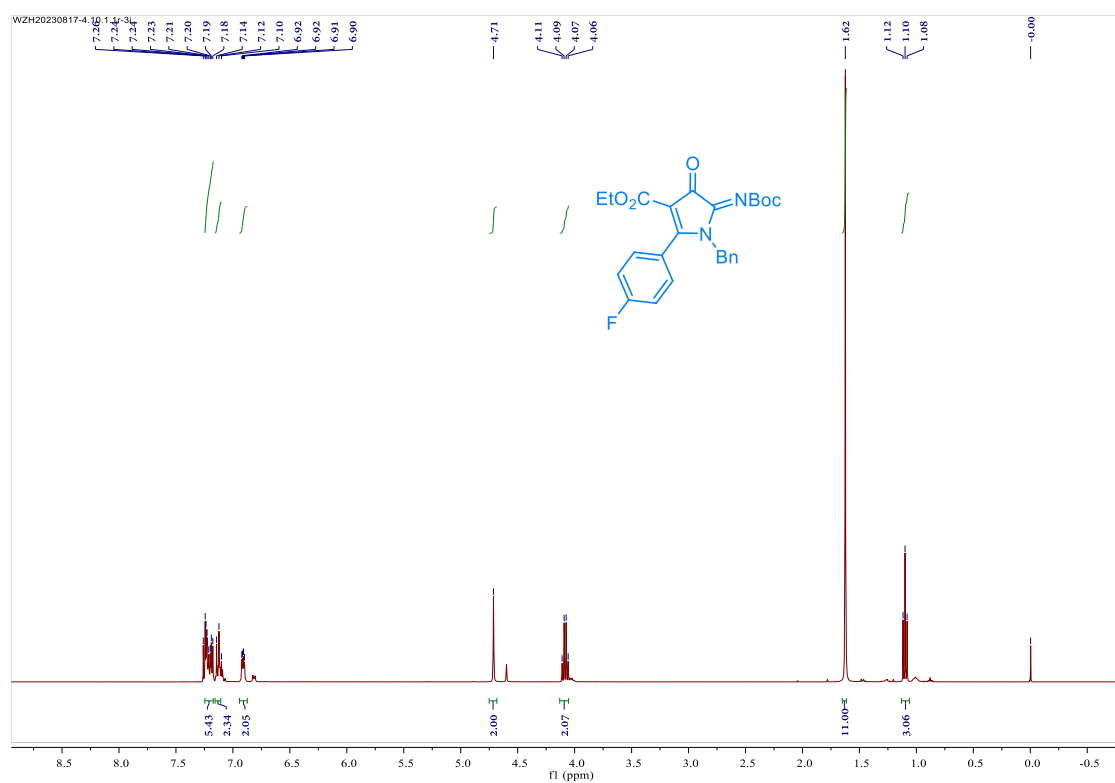

<sup>13</sup>C NMR (101 MHz, CDCl<sub>3</sub>) of **1d**

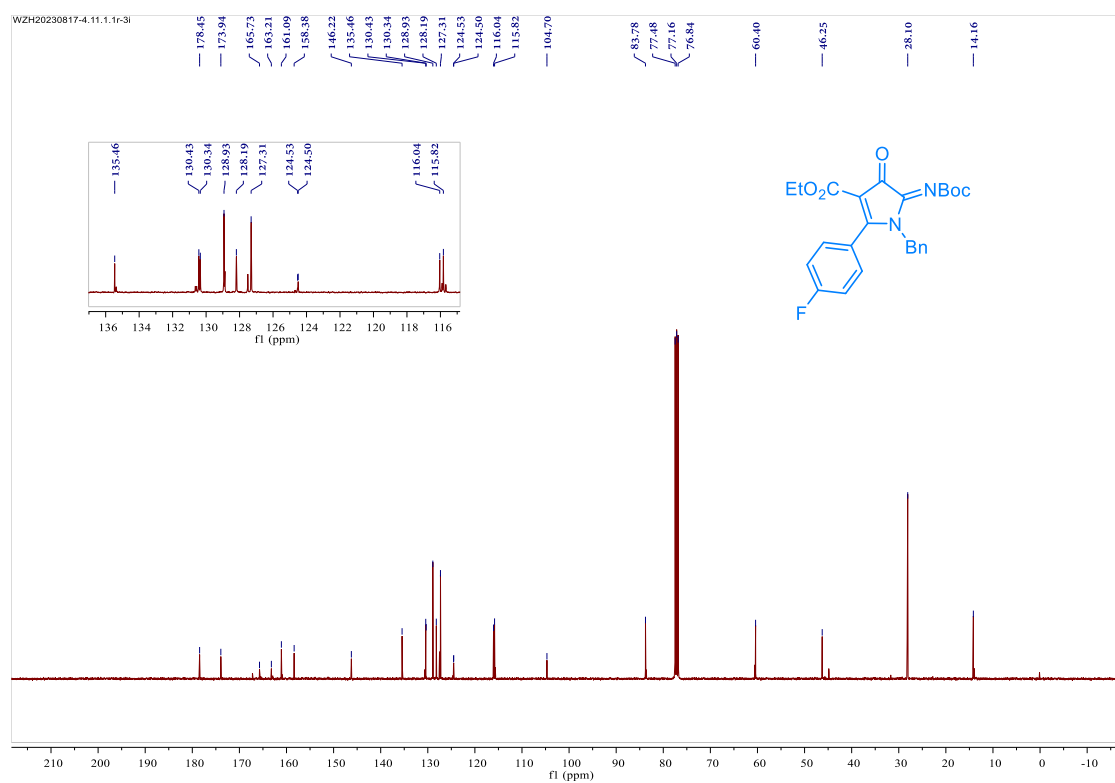

<sup>1</sup>H NMR (400 MHz, CDCl<sub>3</sub>) of **1e**

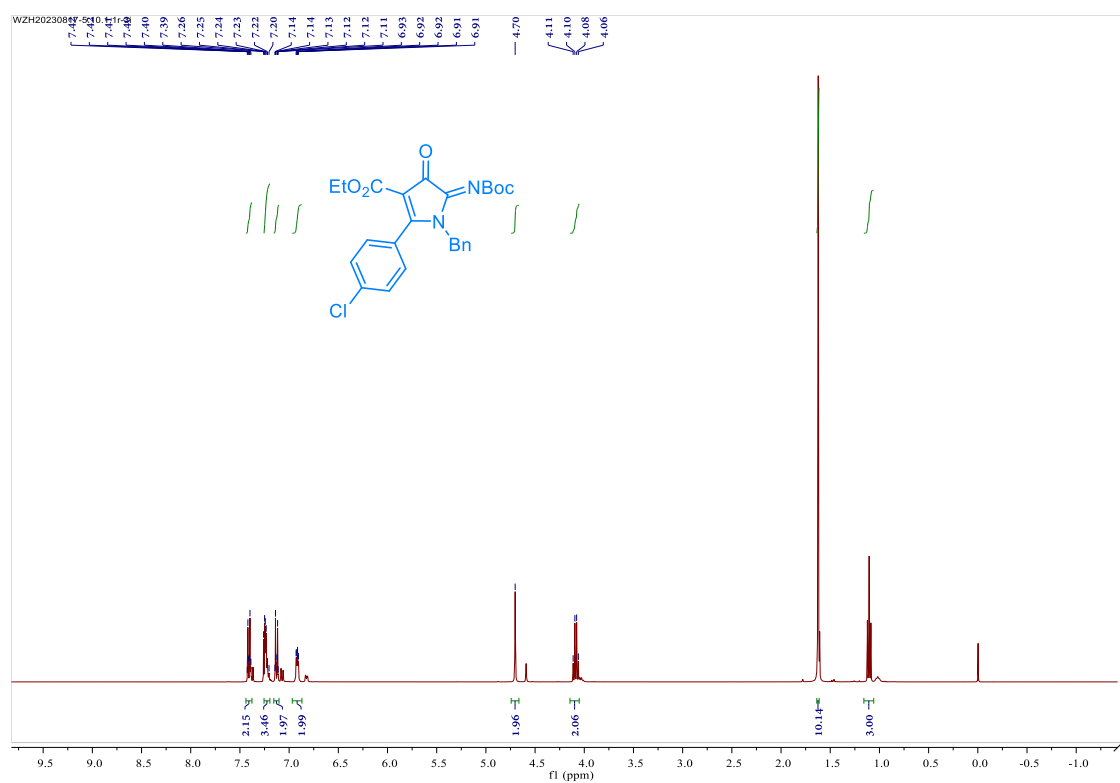

<sup>13</sup>C NMR (101 MHz, CDCl<sub>3</sub>) of **1e**

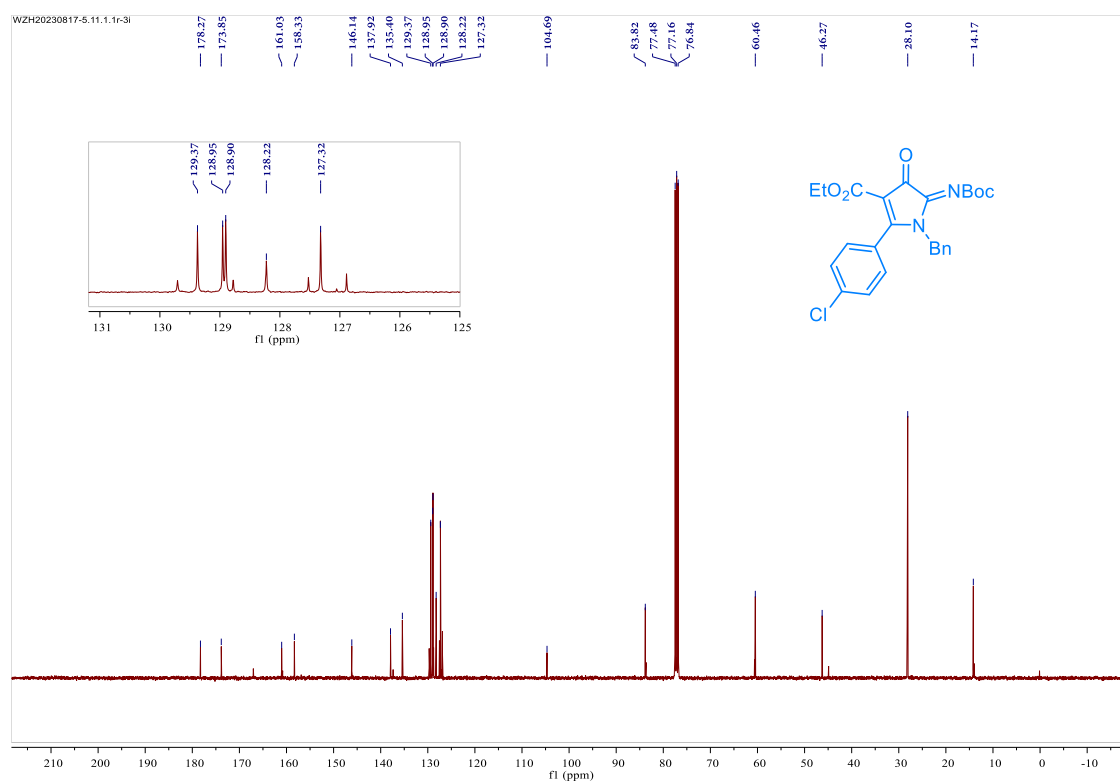

<sup>1</sup>H NMR (400 MHz, CDCl<sub>3</sub>) of **1f**

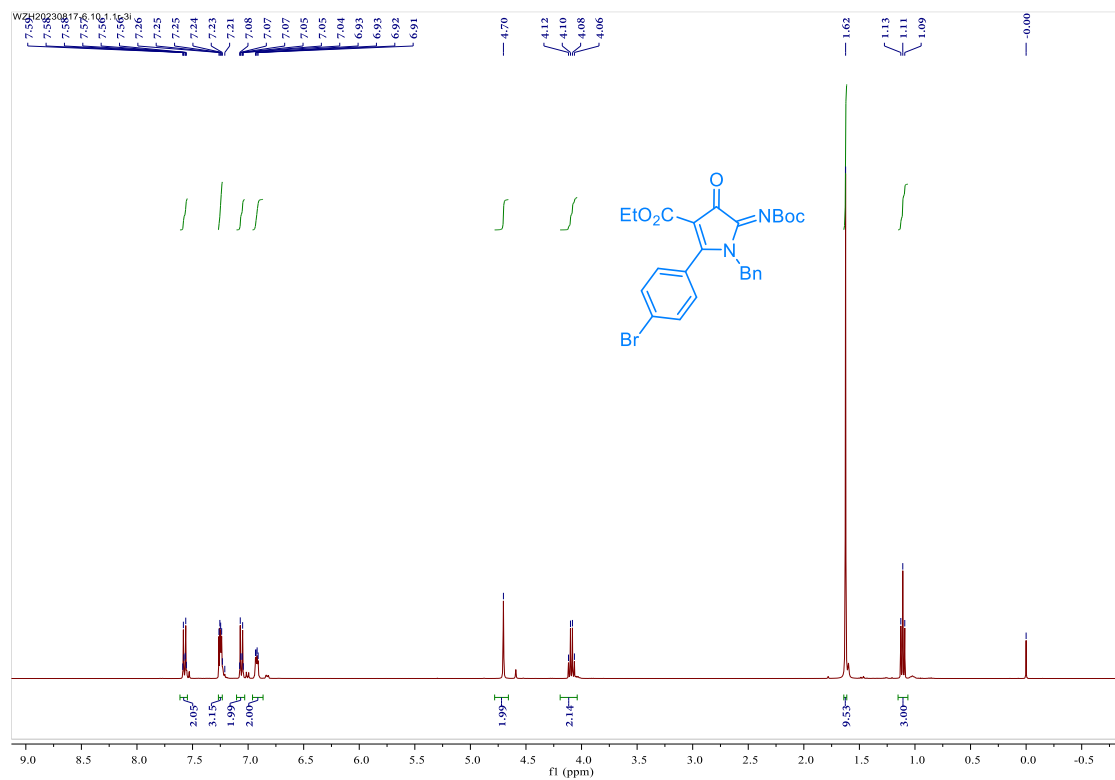

<sup>13</sup>C NMR (101 MHz, CDCl<sub>3</sub>) of **1f**

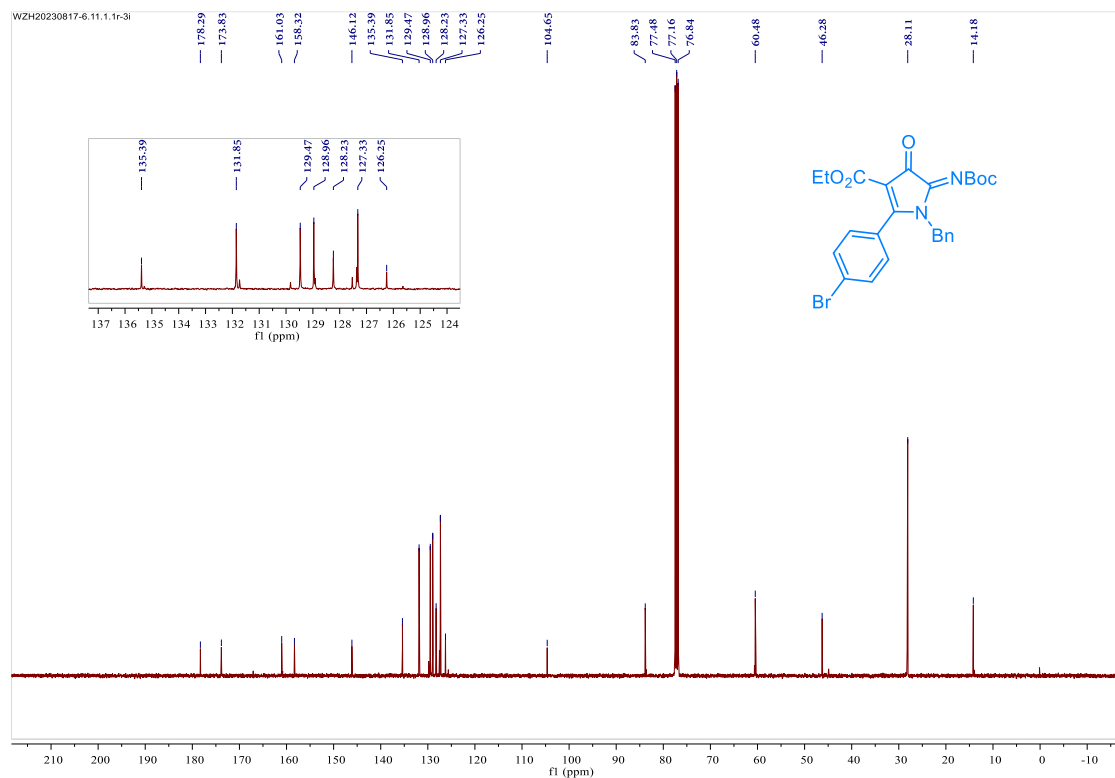

<sup>1</sup>H NMR (400 MHz, CDCl<sub>3</sub>) of **1g**

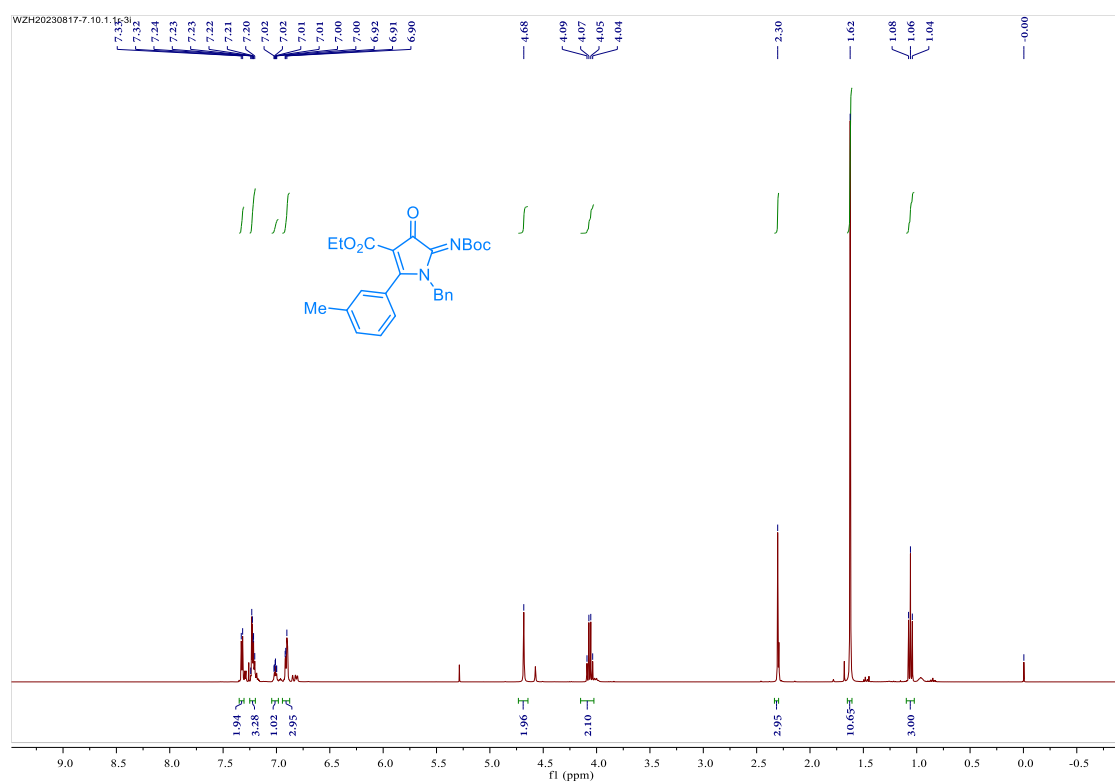

<sup>13</sup>C NMR (101 MHz, CDCl<sub>3</sub>) of **1g**

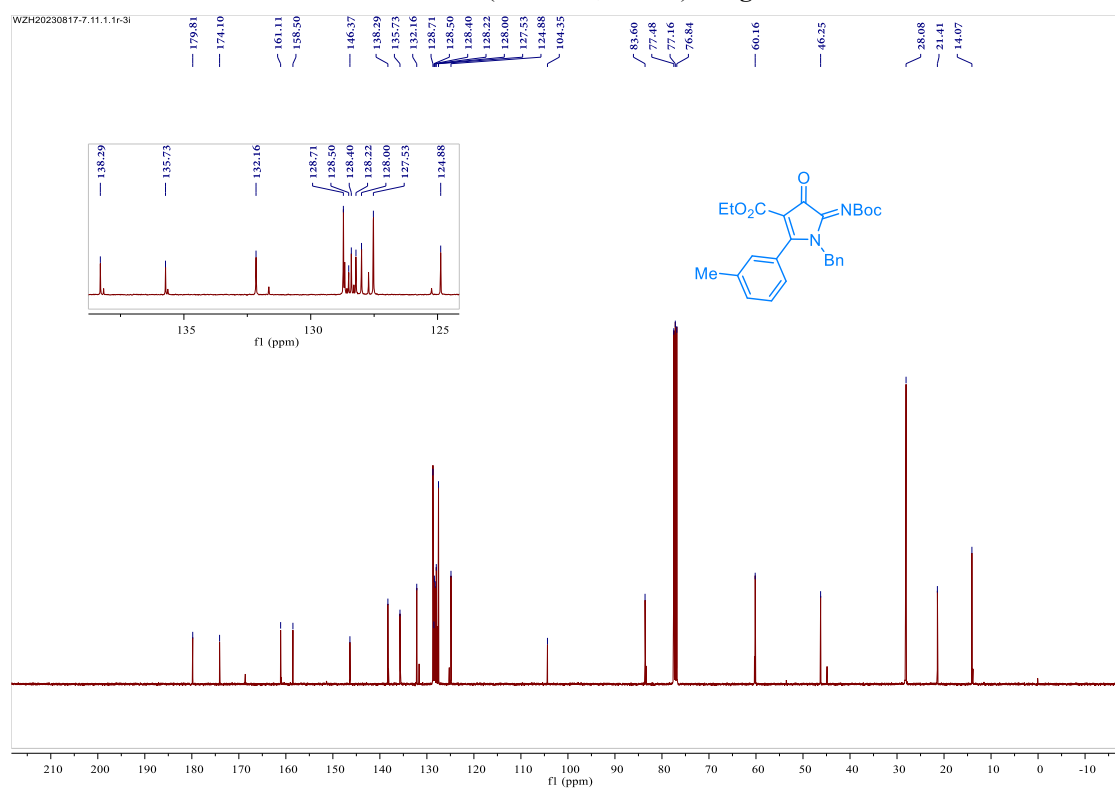



<sup>1</sup>H NMR (400 MHz, CDCl<sub>3</sub>) of **1h**

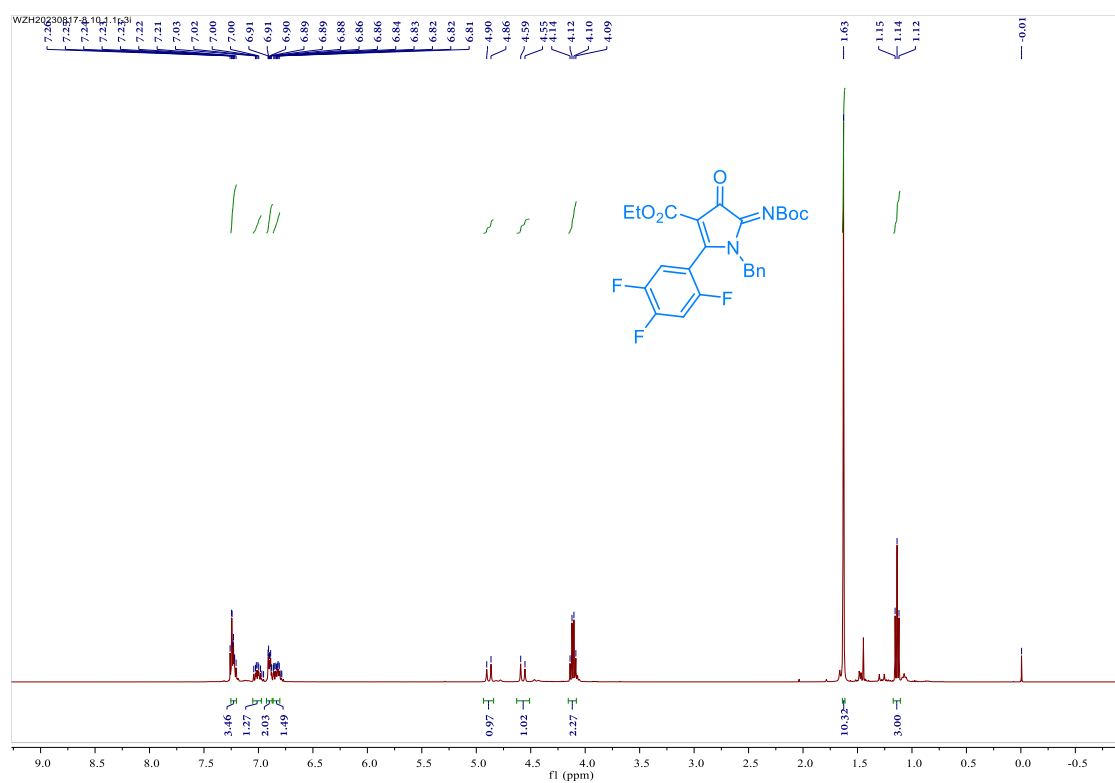

<sup>13</sup>C NMR (101 MHz, CDCl<sub>3</sub>) of **1h**

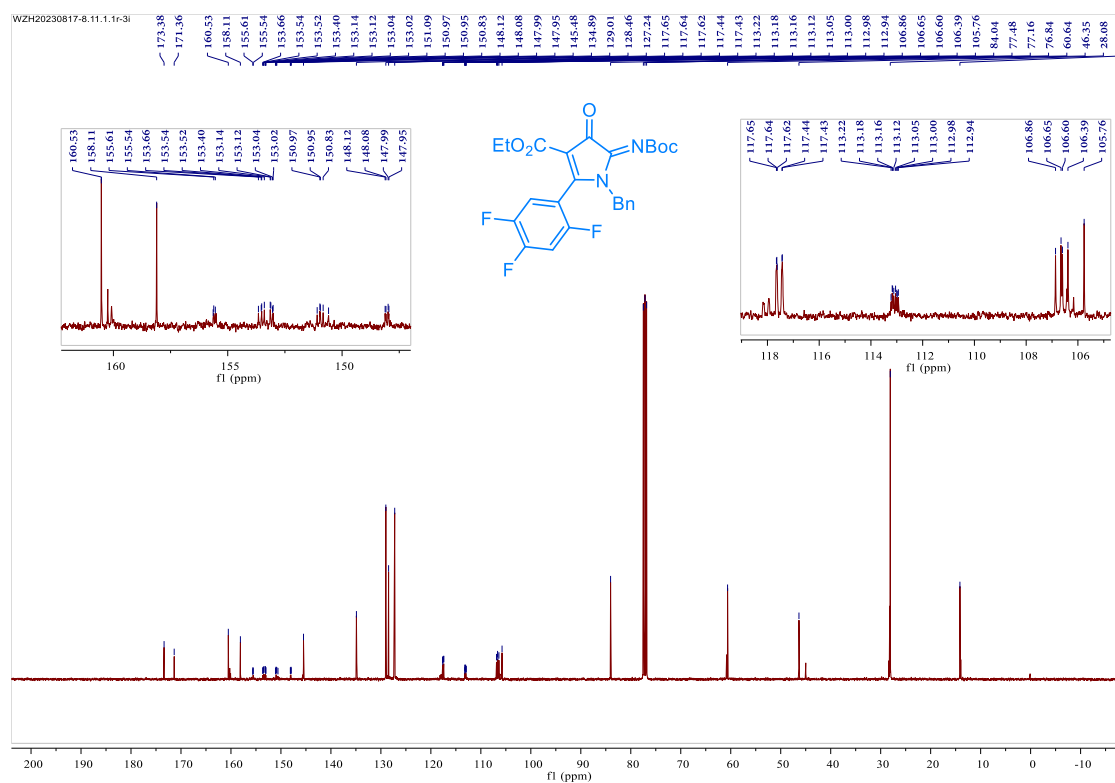

<sup>1</sup>H NMR (400 MHz, CDCl<sub>3</sub>) of **1i**

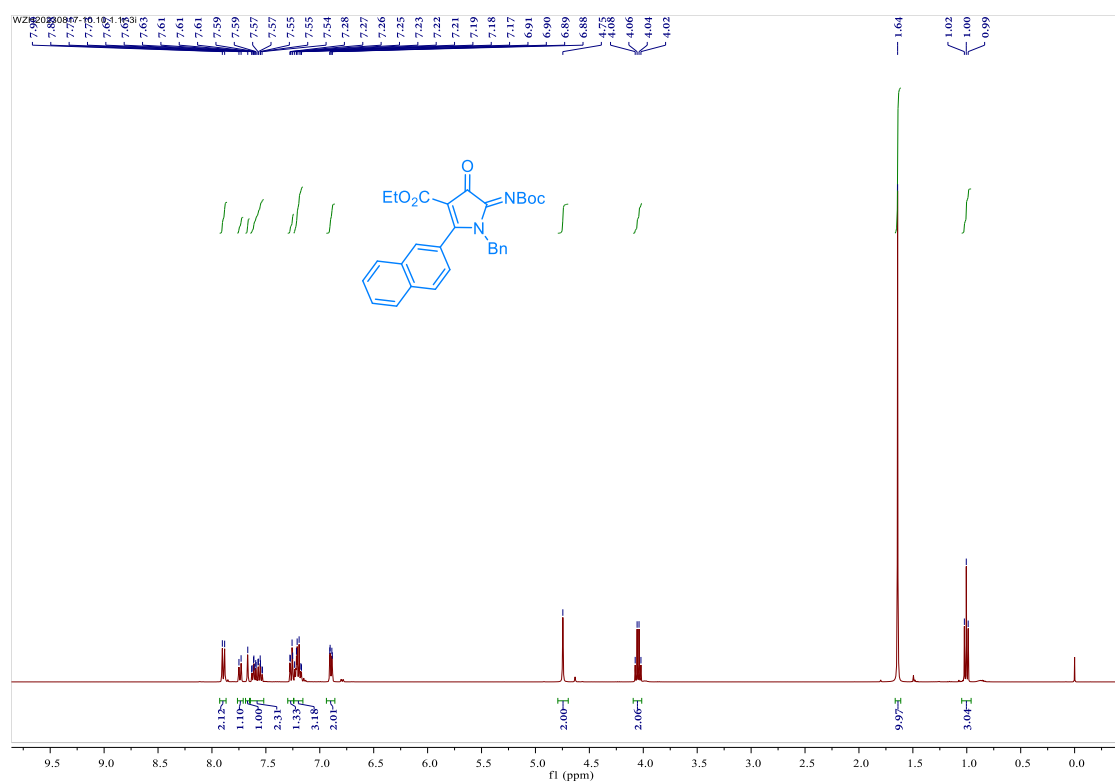

<sup>13</sup>C NMR (101 MHz, CDCl<sub>3</sub>) of **1i**

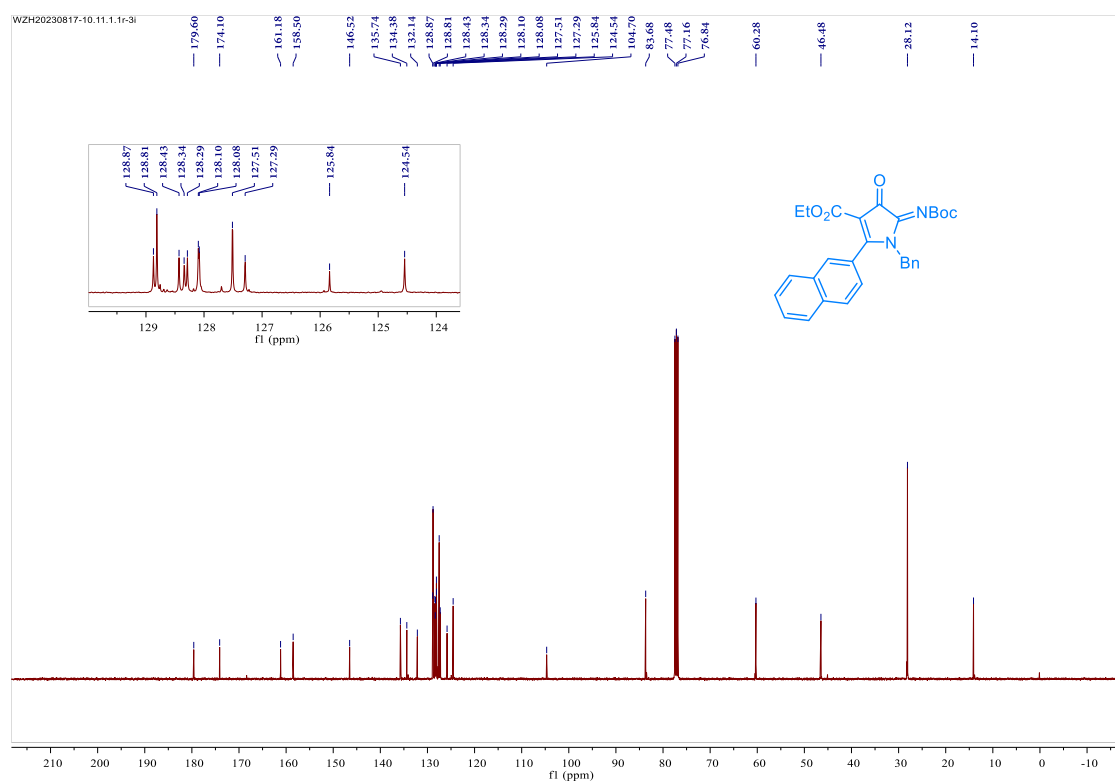

<sup>1</sup>H NMR (400 MHz, CDCl<sub>3</sub>) of **1j**

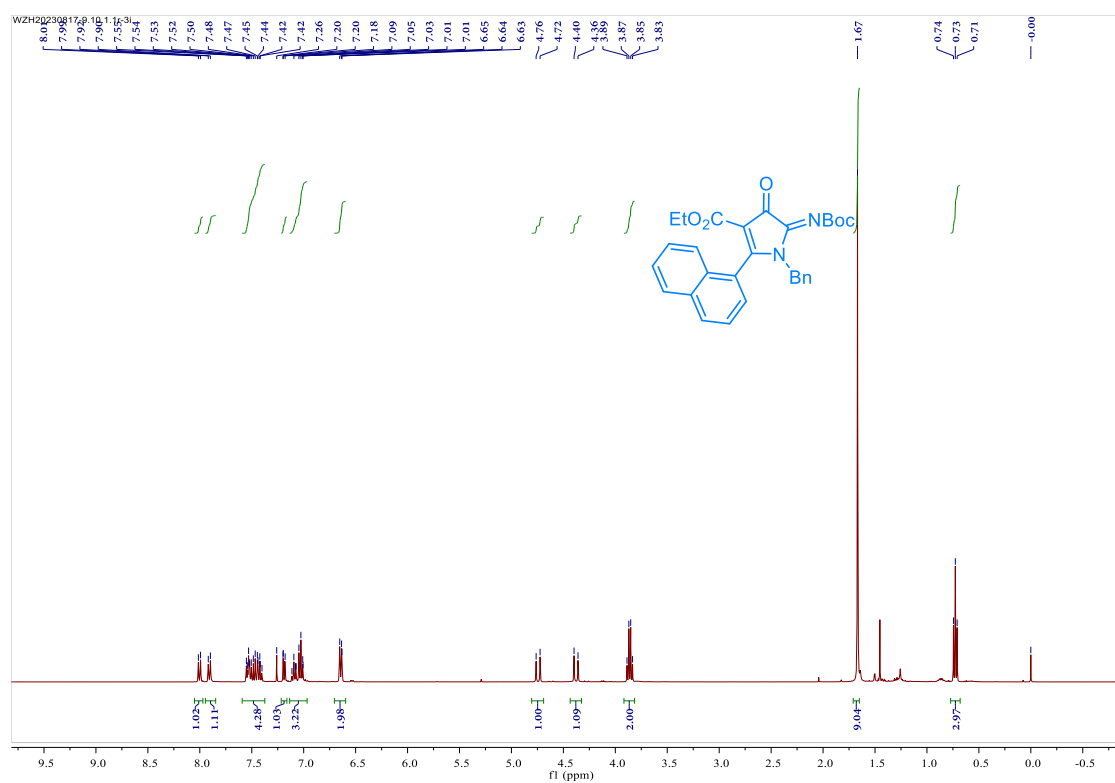

<sup>13</sup>C NMR (101 MHz, CDCl<sub>3</sub>) of **1j**

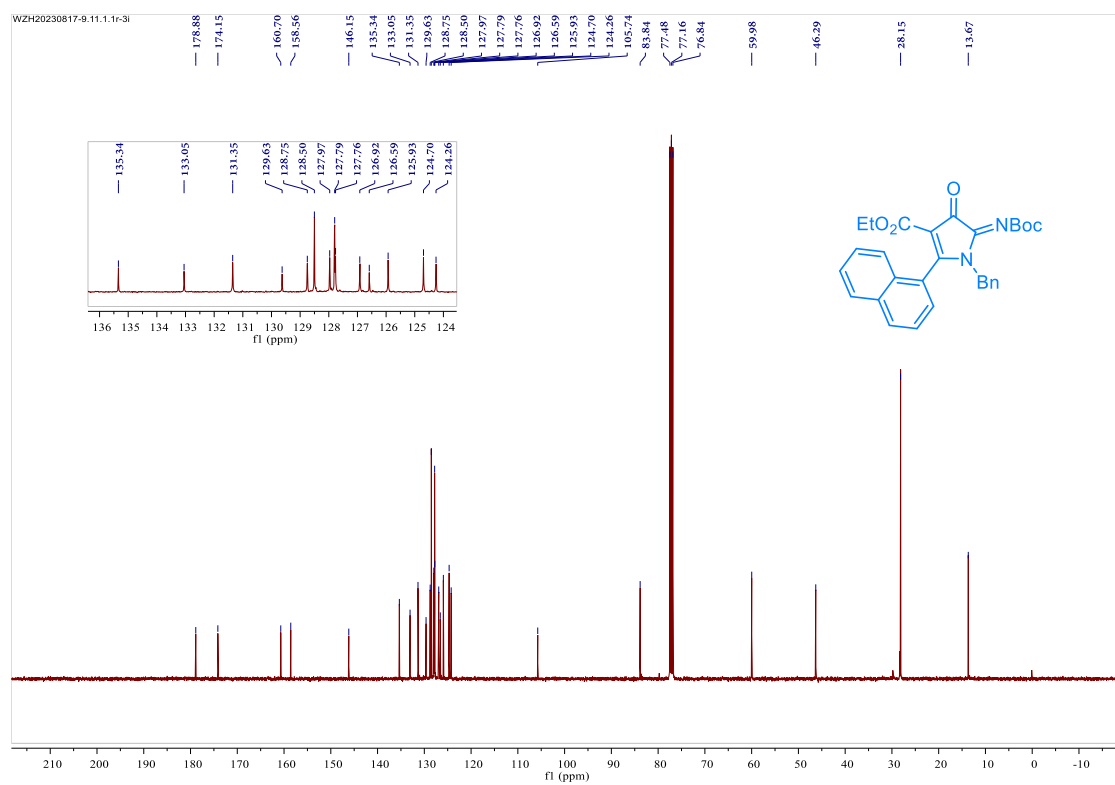



<sup>1</sup>H NMR (400 MHz, CDCl<sub>3</sub>) of **11**

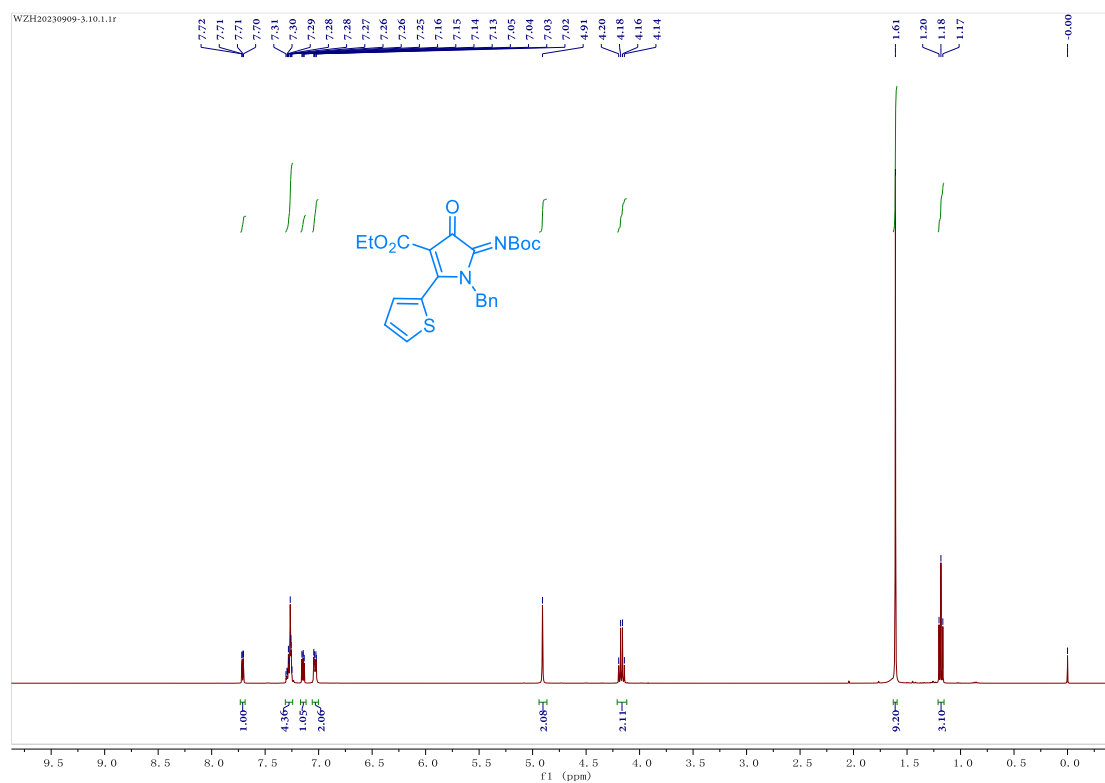

<sup>13</sup>C NMR (101 MHz, CDCl<sub>3</sub>) of **11**

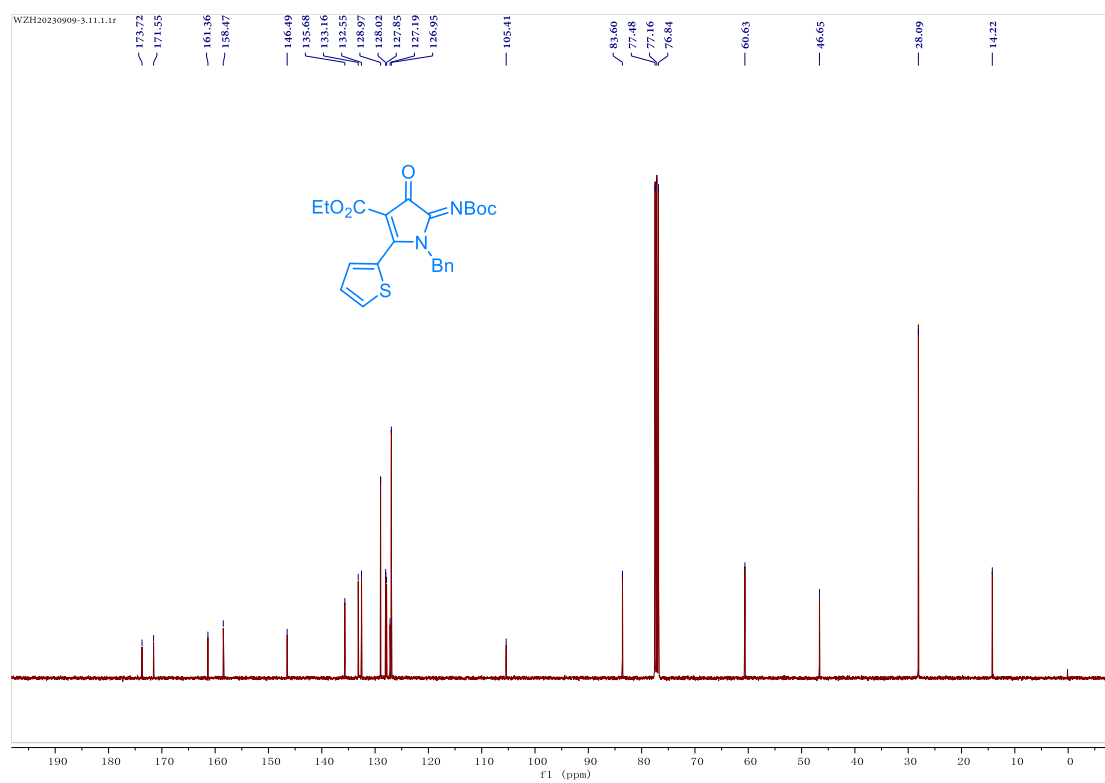



<sup>1</sup>H NMR (400 MHz, CDCl<sub>3</sub>) of **1n**

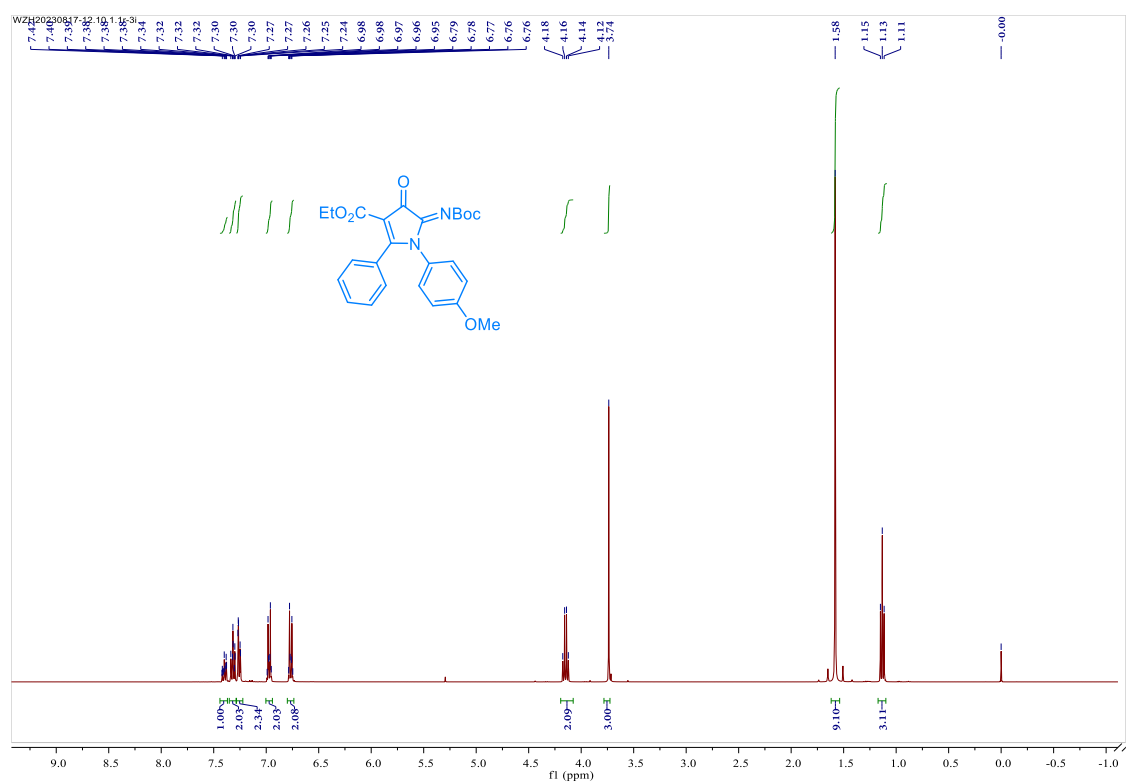

<sup>13</sup>C NMR (101 MHz, CDCl<sub>3</sub>) of **1n**

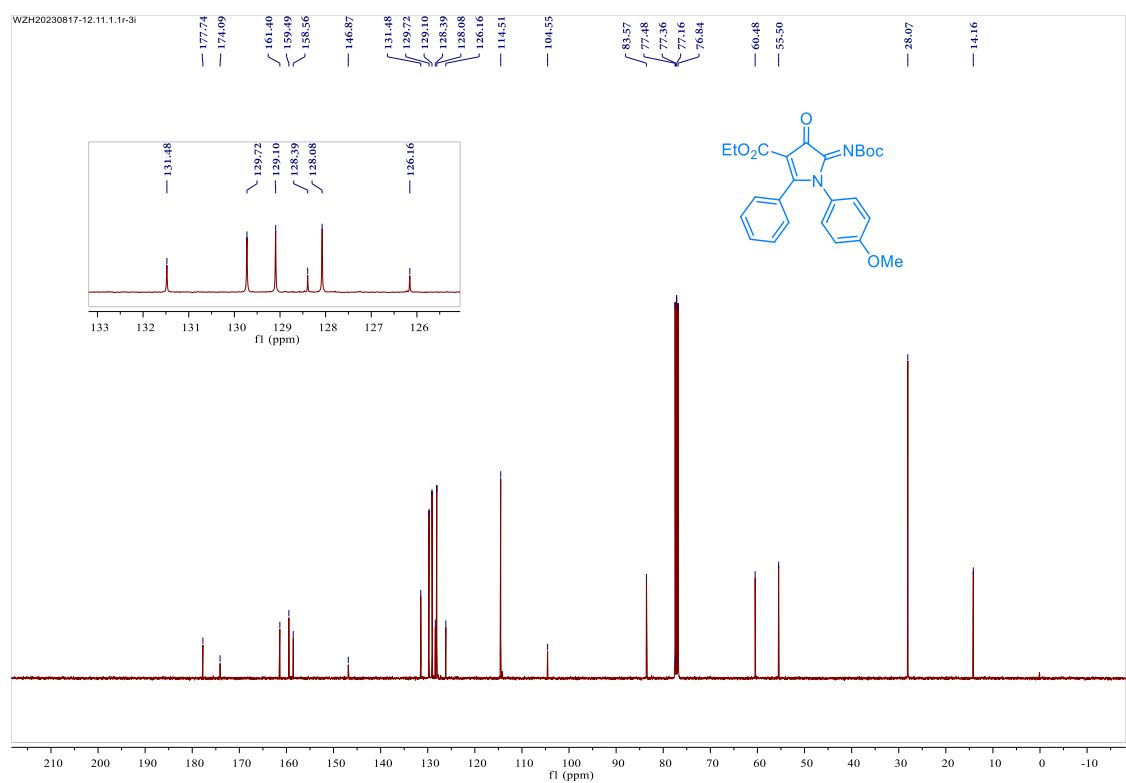

### 10. $^1\text{H}$ , $^{13}\text{C}$ NMR, and HPLC spectra for compounds 3 and 4-6

#### $^1\text{H}$ NMR (400 MHz, $\text{CDCl}_3$ ) of 3aa

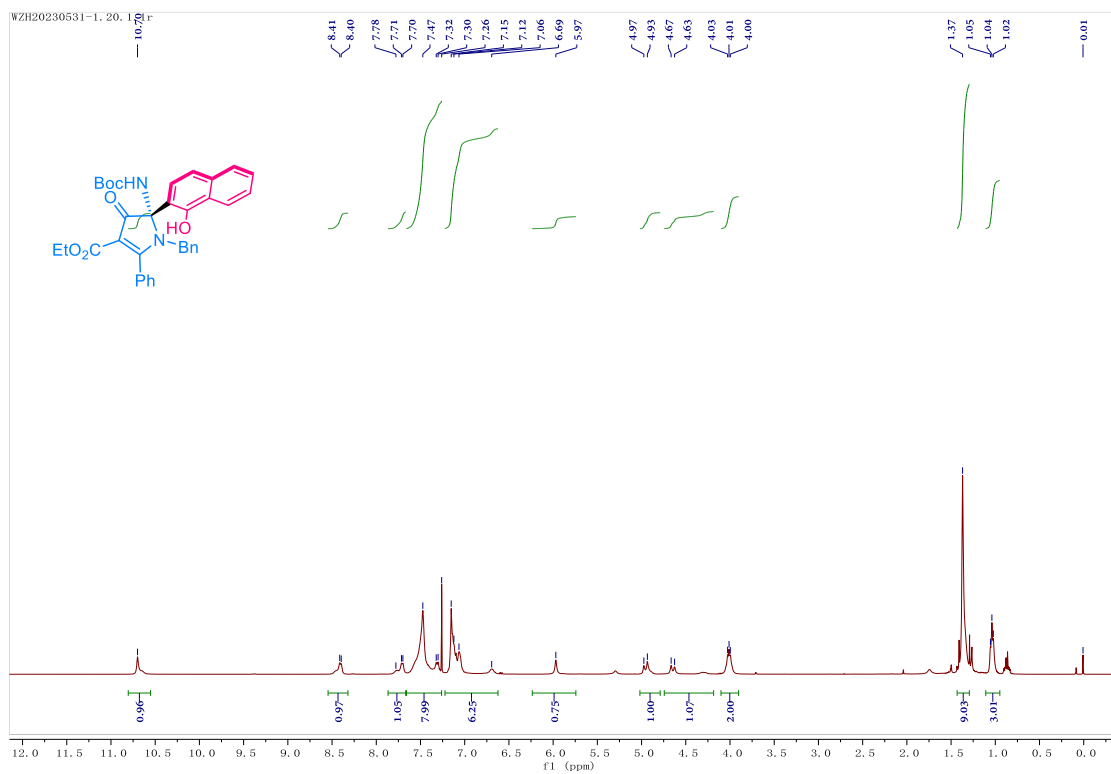

#### $^{13}\text{C}$ NMR (101 MHz, $\text{CDCl}_3$ ) of 3aa

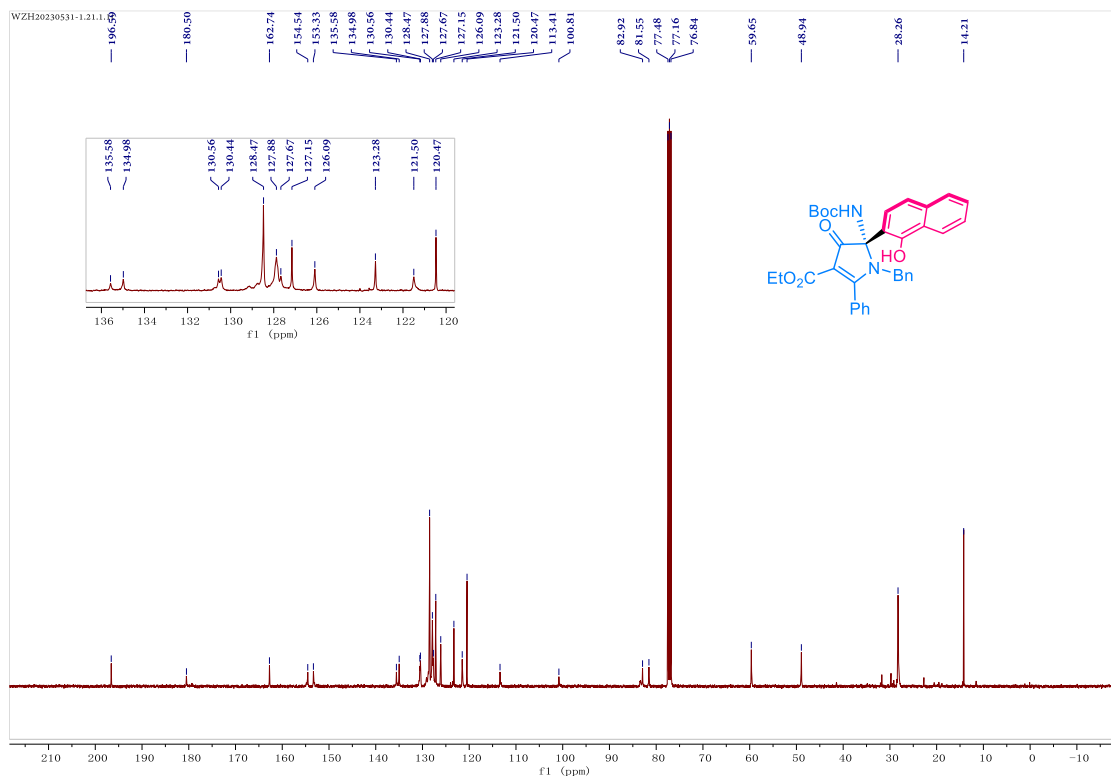



## HPLC spectra of 3aa

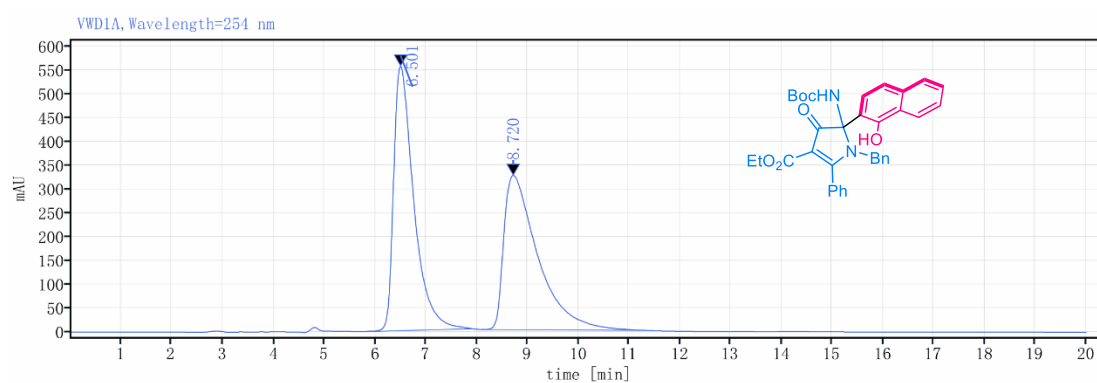

Detector VWD1A, Wavelength=254 nm

| Peak | Ret.Time [min] | Area     | Height | Area%  |
|------|----------------|----------|--------|--------|
|      | 6.501          | 15306.82 | 554.90 | 50.37  |
|      | 8.720          | 15082.18 | 323.92 | 49.63  |
|      |                | 30388.99 |        | 100.00 |

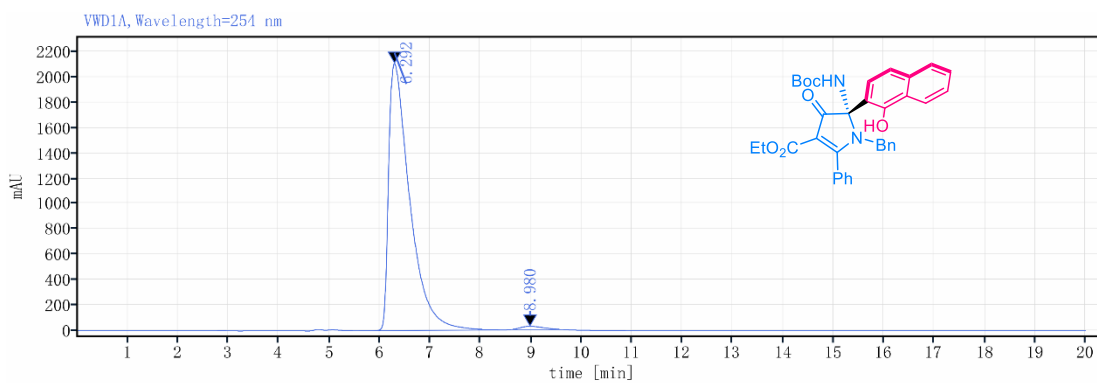

Detector VWD1A, Wavelength=254 nm

| Peak | Ret.Time [min] | Area     | Height  | Area%  |
|------|----------------|----------|---------|--------|
|      | 6.292          | 61281.61 | 2104.76 | 98.79  |
|      | 8.980          | 749.45   | 24.65   | 1.21   |
|      |                | 62031.06 |         | 100.00 |

### <sup>1</sup>H NMR (400 MHz, CDCl<sub>3</sub>) of 3ba

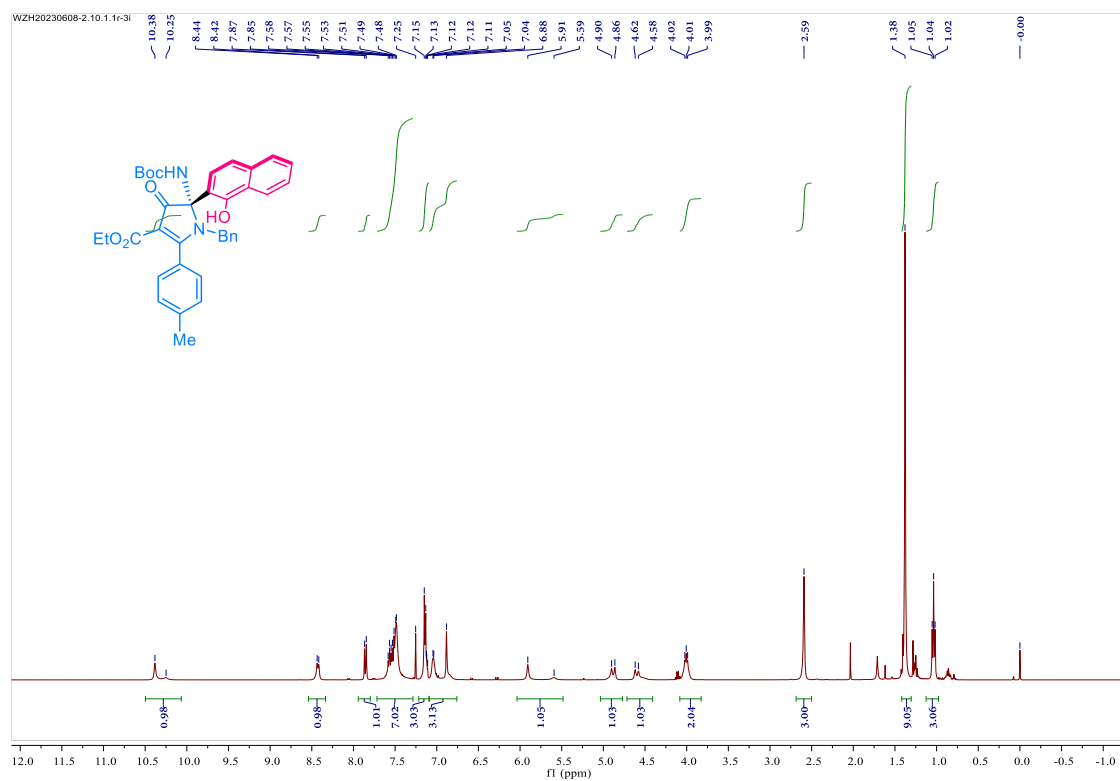

### <sup>13</sup>C NMR (101 MHz, CDCl<sub>3</sub>) of 3ba

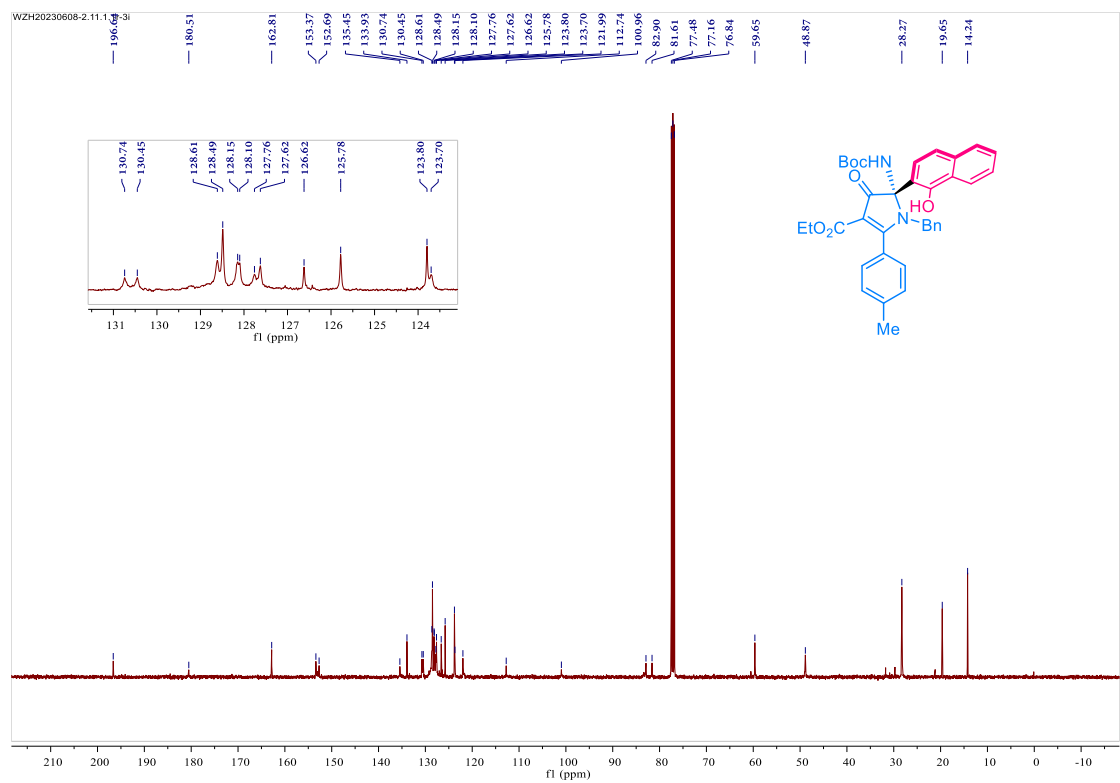

### HPLC spectra of 3ba

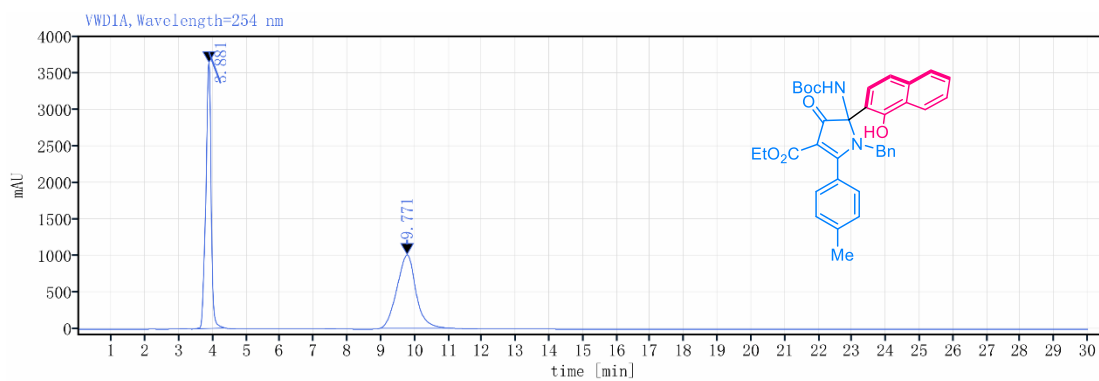

Detector VWD1A, Wavelength=254 nm

| Peak | Ret.Time [min] | Area     | Height  | Area%  |
|------|----------------|----------|---------|--------|
|      | 3.881          | 40055.50 | 3641.43 | 50.40  |
|      | 9.771          | 39424.26 | 1006.10 | 49.60  |
|      |                | 79479.76 |         | 100.00 |

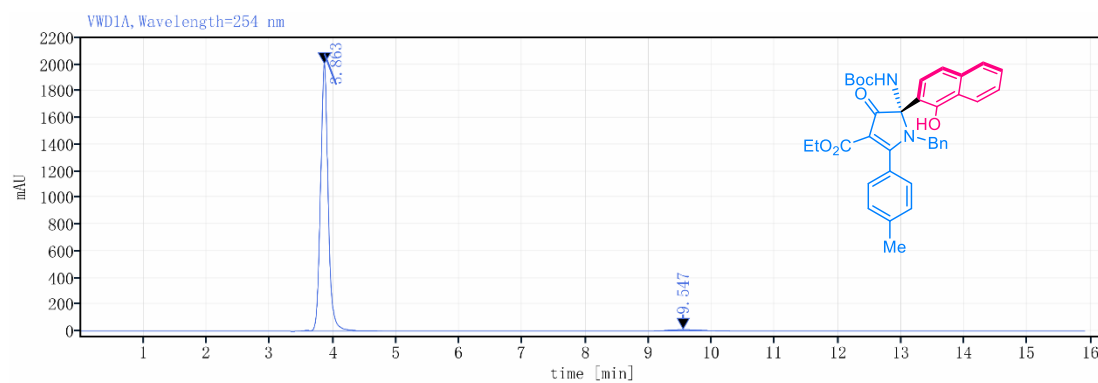

Detector VWD1A, Wavelength=254 nm

| Peak | Ret.Time [min] | Area     | Height  | Area%  |
|------|----------------|----------|---------|--------|
|      | 3.863          | 16901.72 | 2002.42 | 98.45  |
|      | 9.547          | 266.84   | 8.85    | 1.55   |
|      |                | 17168.56 |         | 100.00 |

### <sup>1</sup>H NMR (400 MHz, CDCl<sub>3</sub>) of 3ca

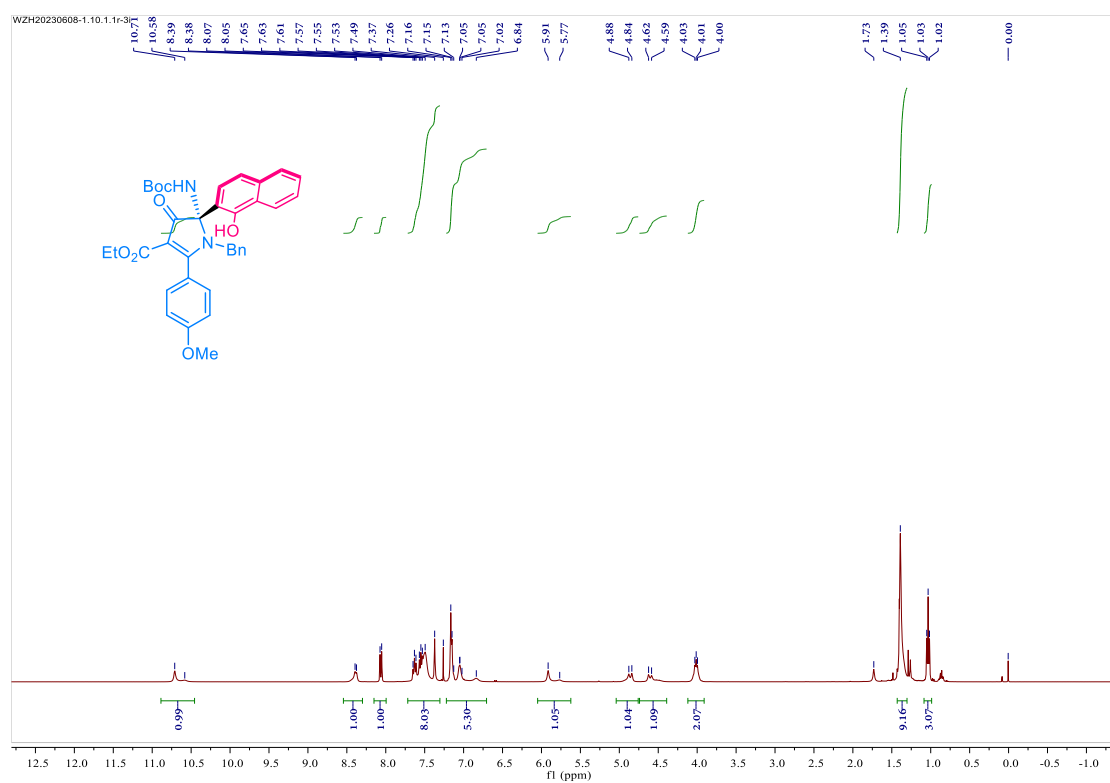

### <sup>13</sup>C NMR (101 MHz, CDCl<sub>3</sub>) of 3ca

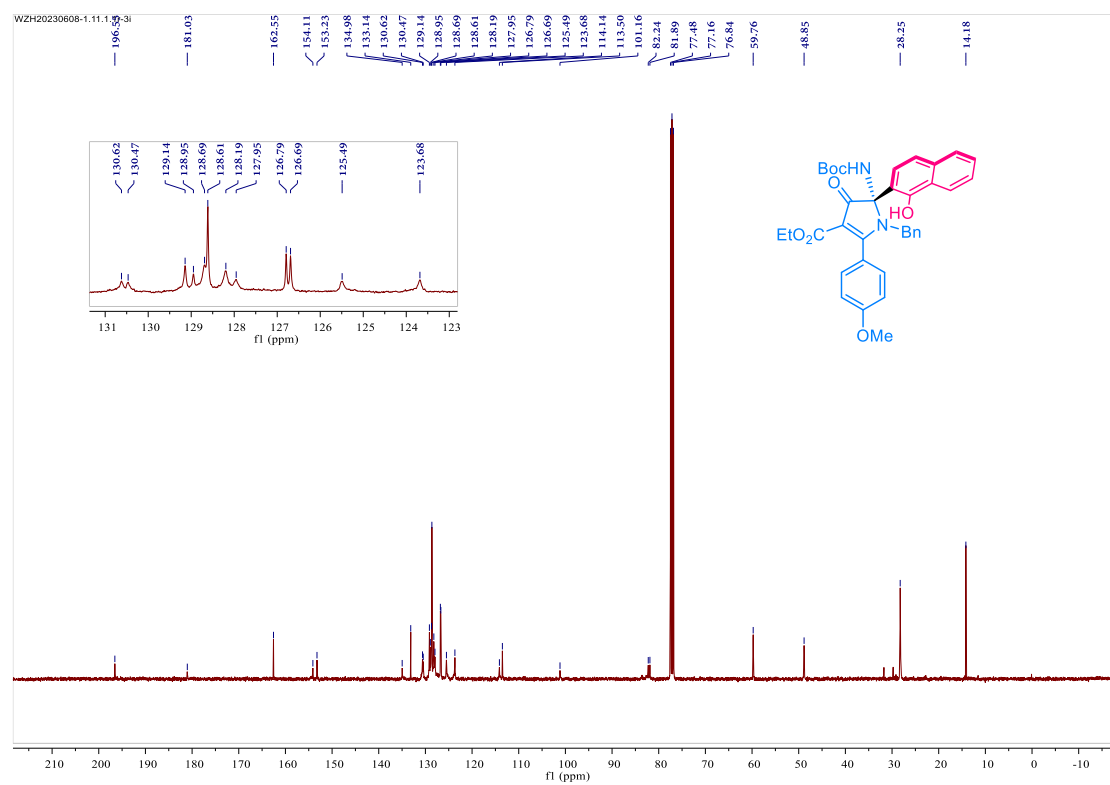

### HPLC spectra of 3ca

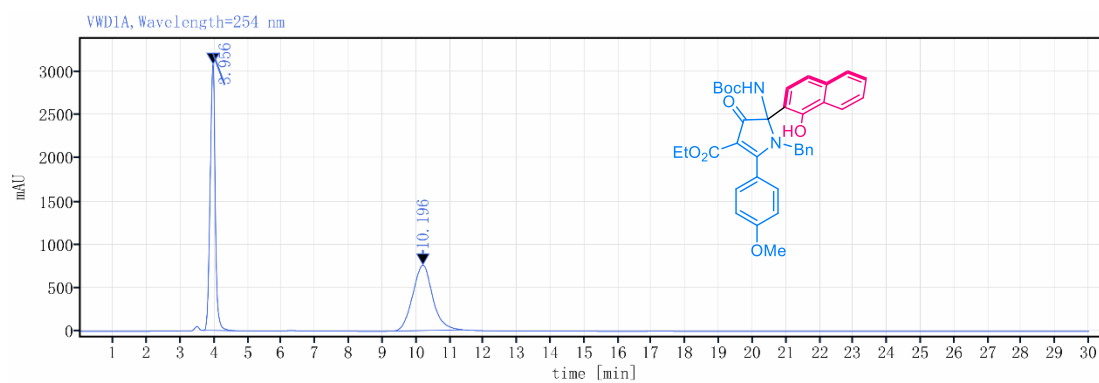

Detector VWD1A, Wavelength=254 nm

| Peak | Ret.Time [min] | Area     | Height  | Area%  |
|------|----------------|----------|---------|--------|
|      | 3.956          | 32223.01 | 3081.76 | 50.76  |
|      | 10.196         | 31254.47 | 758.46  | 49.24  |
|      |                | 63477.49 |         | 100.00 |

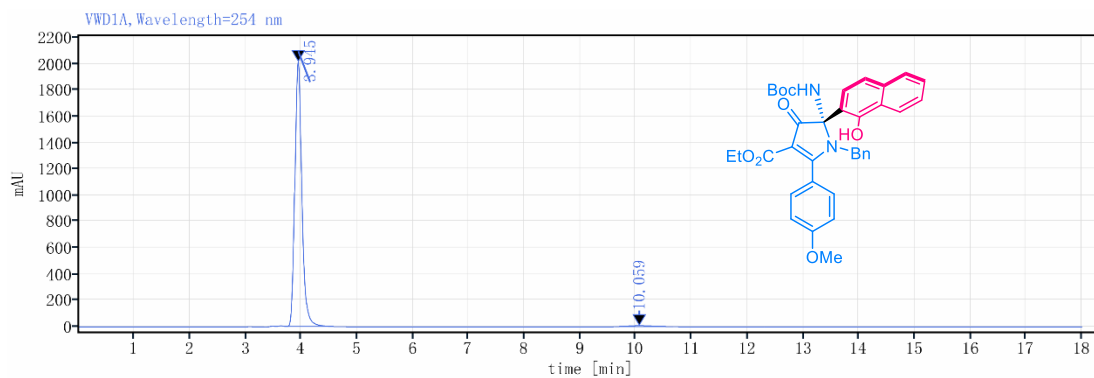

Detector VWD1A, Wavelength=254 nm

| Peak | Ret.Time [min] | Area     | Height  | Area%  |
|------|----------------|----------|---------|--------|
|      | 3.945          | 17627.98 | 2011.23 | 98.59  |
|      | 10.059         | 251.60   | 7.43    | 1.41   |
|      |                | 17879.59 |         | 100.00 |

### <sup>1</sup>H NMR (400 MHz, CDCl<sub>3</sub>) of 3da

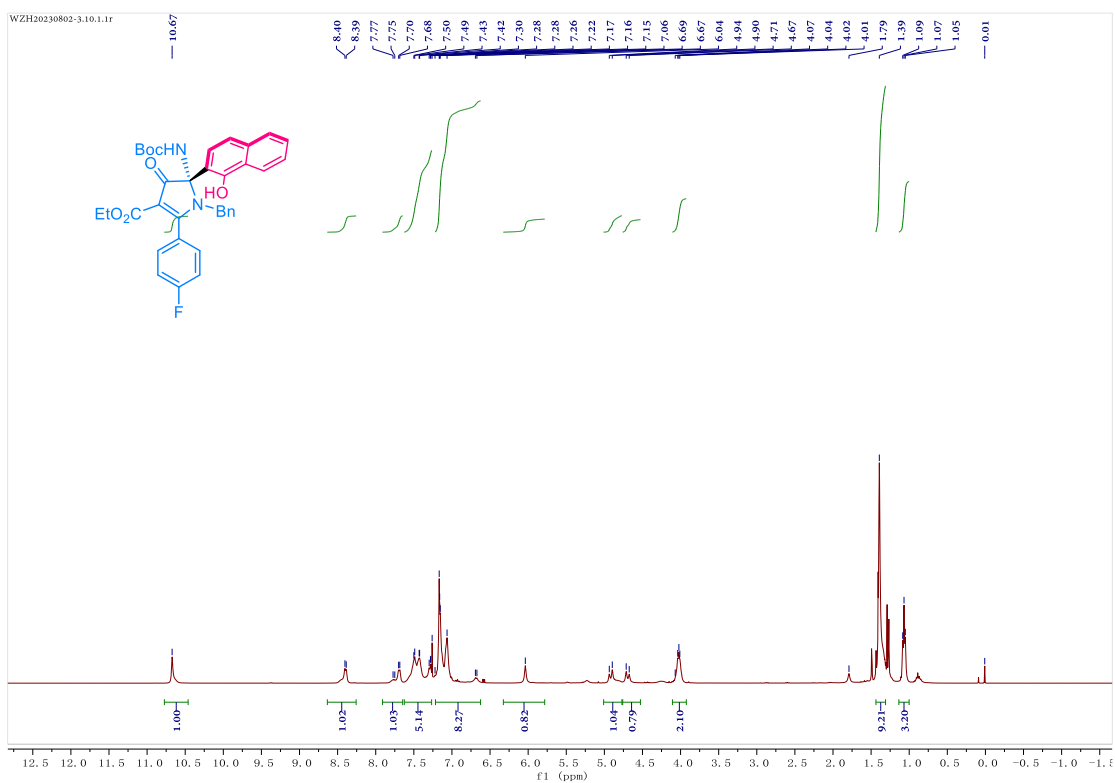

### <sup>13</sup>C NMR (101 MHz, CDCl<sub>3</sub>) of 3da

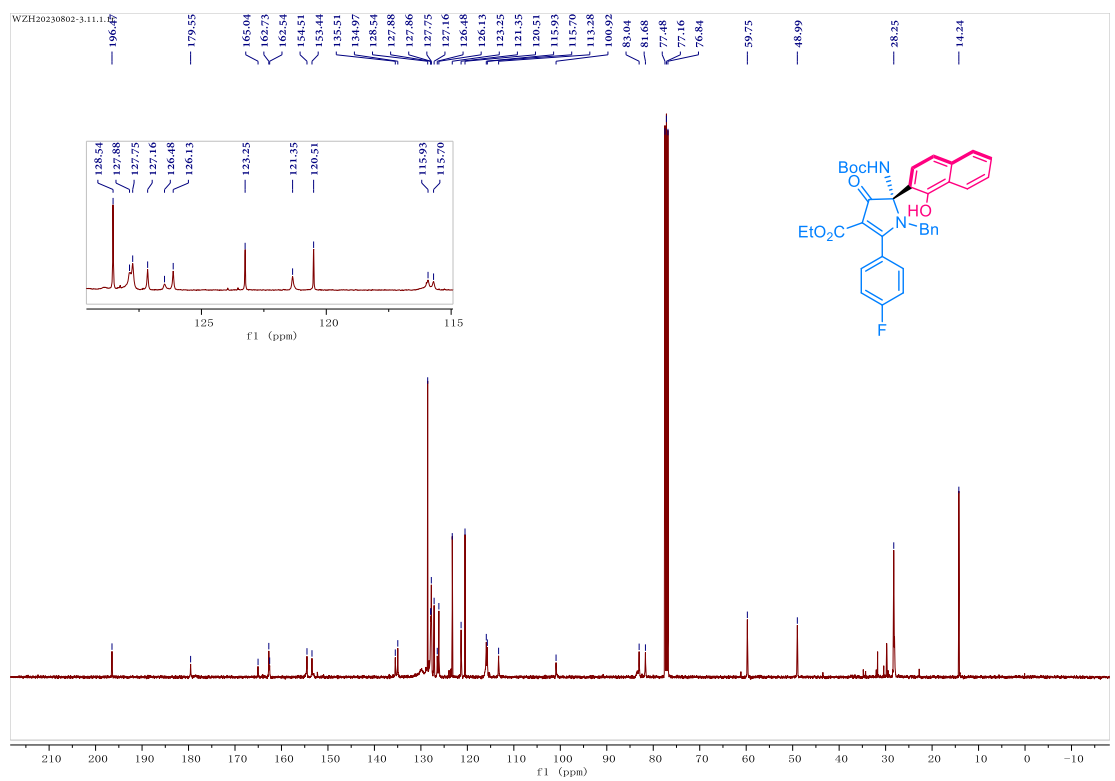

### $^{19}\text{F}$ NMR (377 MHz, $\text{CDCl}_3$ ) of **3da**

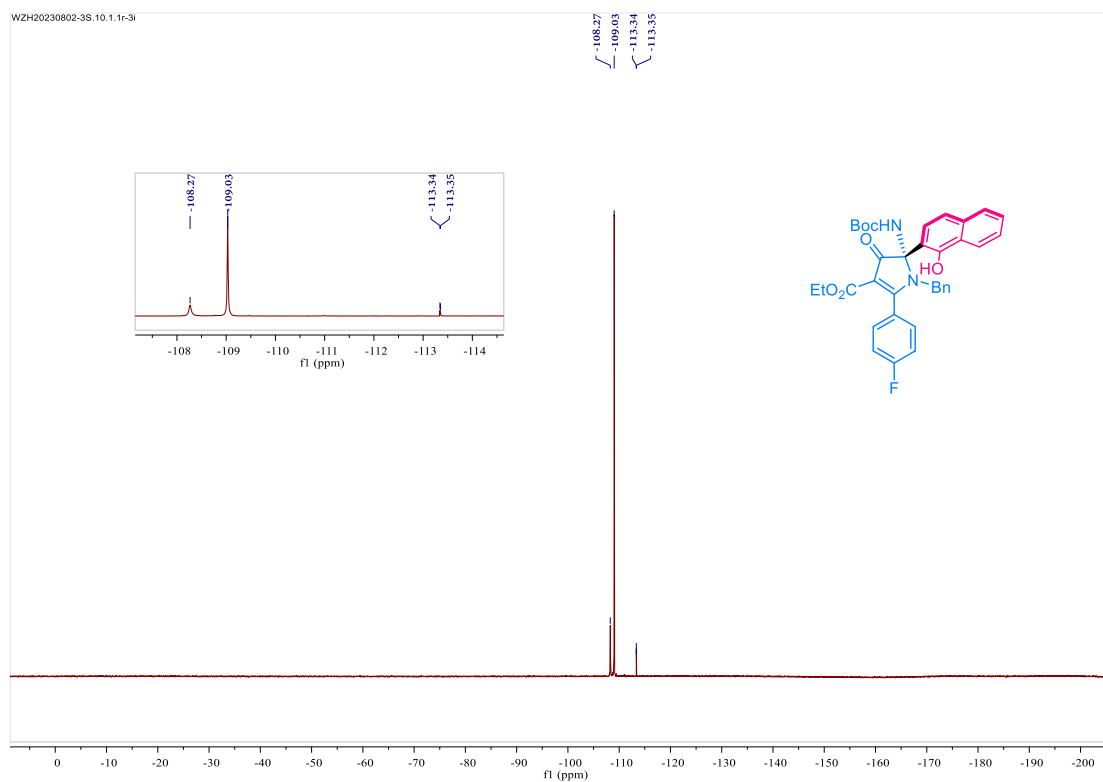

### HPLC spectra of **3da**

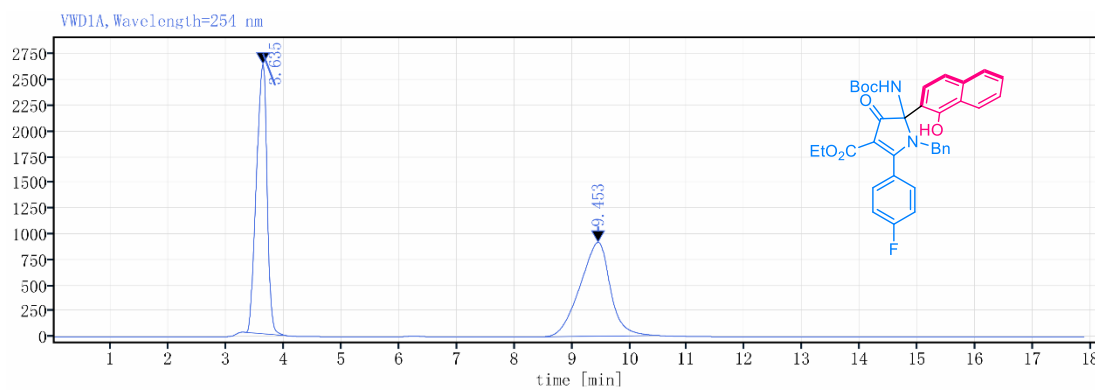

Detector VWD1A, Wavelength=254 nm

| Peak | Ret. Time [min] | Area     | Height  | Area%  |
|------|-----------------|----------|---------|--------|
|      | 3.635           | 33826.21 | 2624.06 | 50.32  |
|      | 9.453           | 33397.08 | 914.22  | 49.68  |
|      |                 | 67223.29 |         | 100.00 |

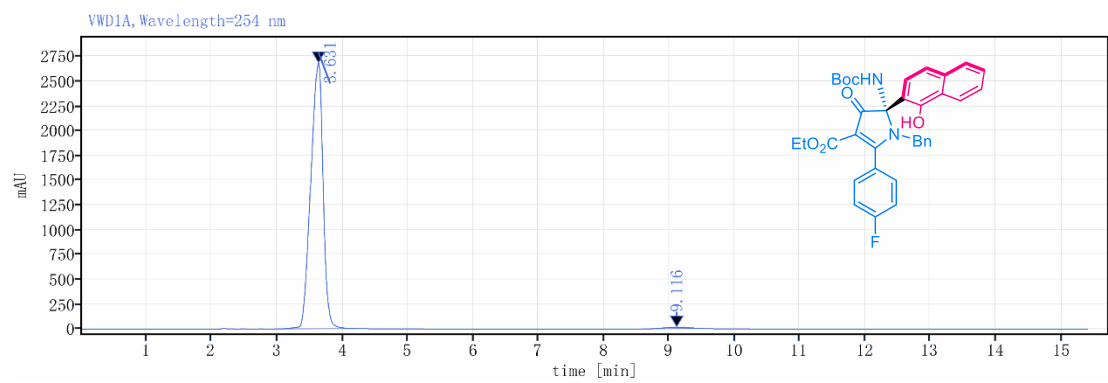

Detector VWD1A, Wavelength=254 nm

| Peak | Ret.Time [min] | Area     | Height  | Area%  |
|------|----------------|----------|---------|--------|
|      | 3.631          | 35218.32 | 2685.07 | 98.82  |
|      | 9.116          | 419.75   | 14.79   | 1.18   |
|      |                | 35638.07 |         | 100.00 |



### <sup>1</sup>H NMR (400 MHz, CDCl<sub>3</sub>) of 3ea

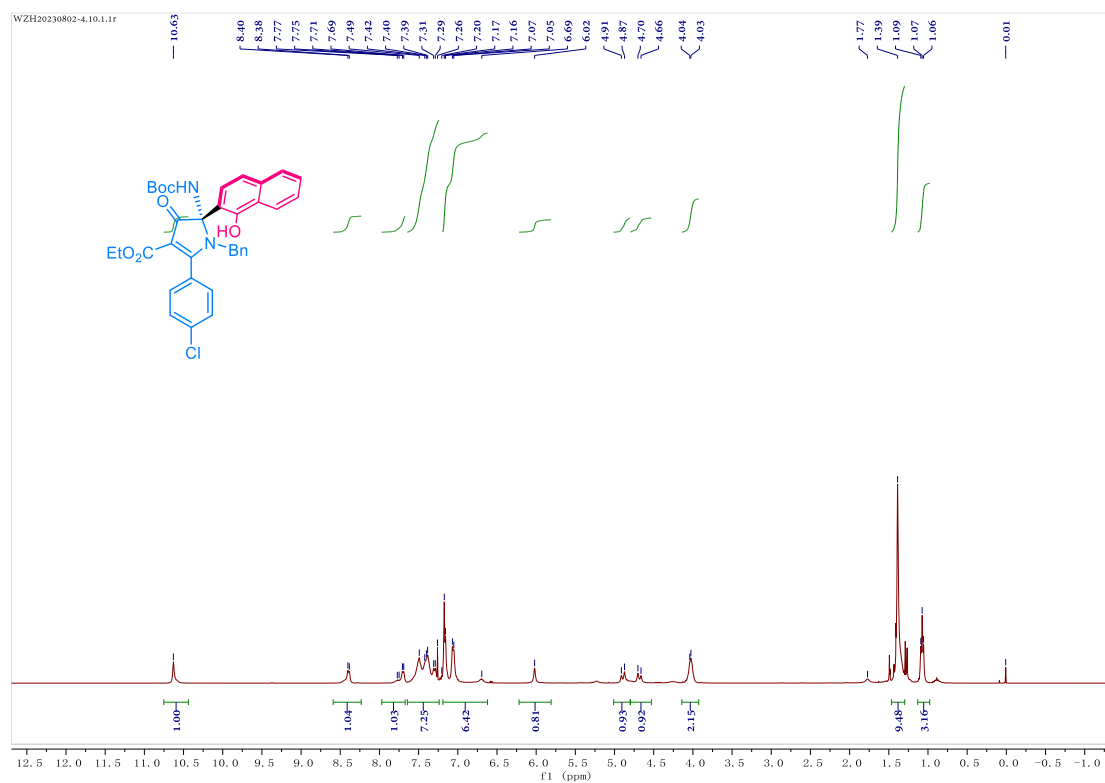

### <sup>13</sup>C NMR (101 MHz, CDCl<sub>3</sub>) of 3ea

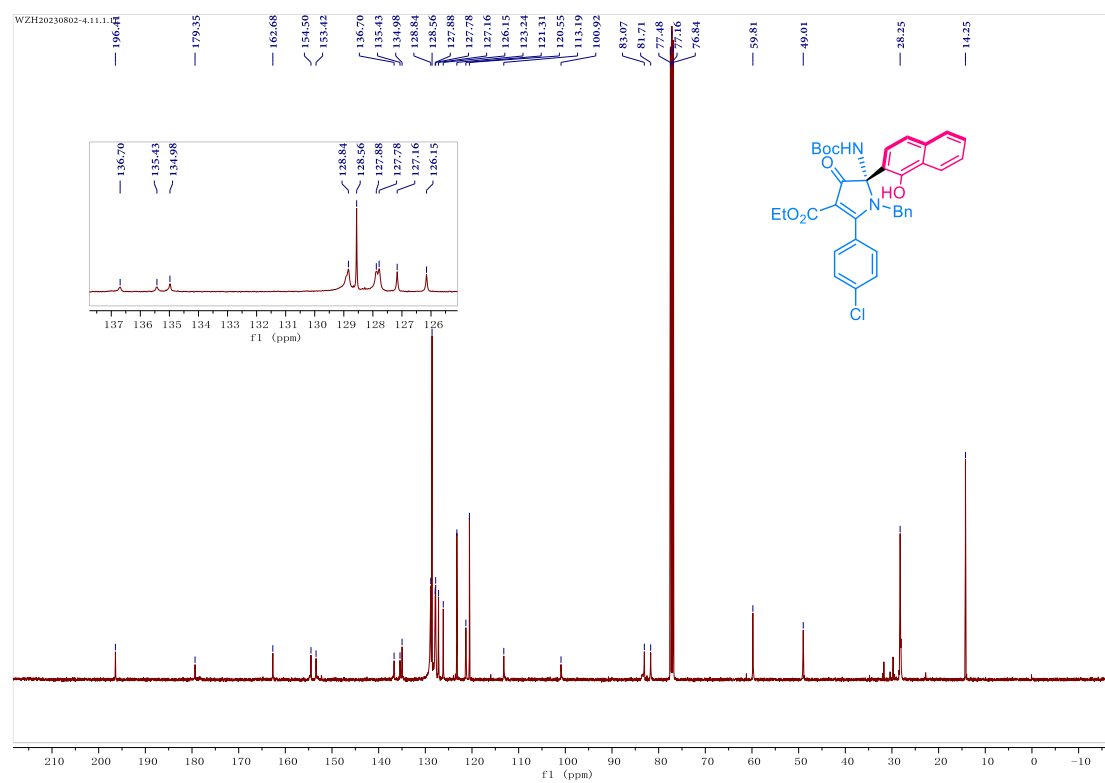

### HPLC spectra of 3ea

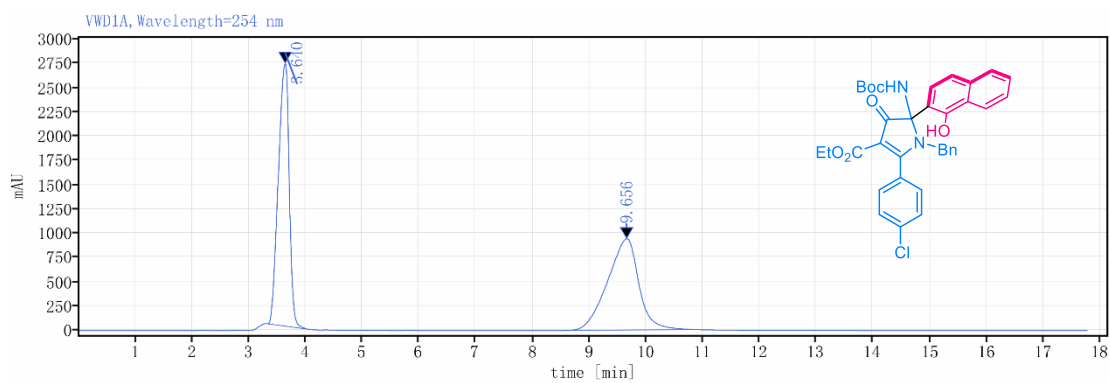

Detector VWD1A, Wavelength=254 nm

| Peak | Ret.Time [min] | Area     | Height  | Area%  |
|------|----------------|----------|---------|--------|
|      | 3.640          | 36024.34 | 2704.67 | 50.04  |
|      | 9.656          | 35967.64 | 941.03  | 49.96  |
|      |                | 71991.97 |         | 100.00 |

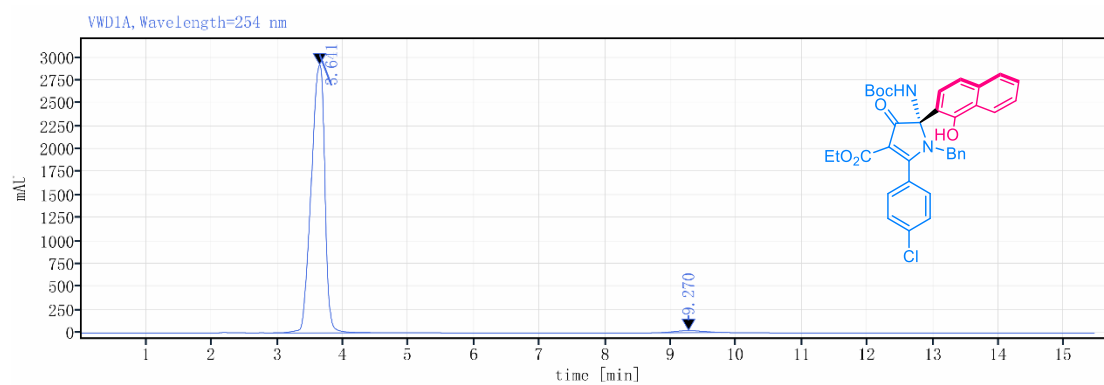

Detector VWD1A, Wavelength=254 nm

| Peak | Ret.Time [min] | Area     | Height  | Area%  |
|------|----------------|----------|---------|--------|
|      | 3.641          | 42066.33 | 2916.89 | 98.33  |
|      | 9.270          | 713.21   | 22.44   | 1.67   |
|      |                | 42779.54 |         | 100.00 |

### <sup>1</sup>H NMR (400 MHz, CDCl<sub>3</sub>) of 3fa

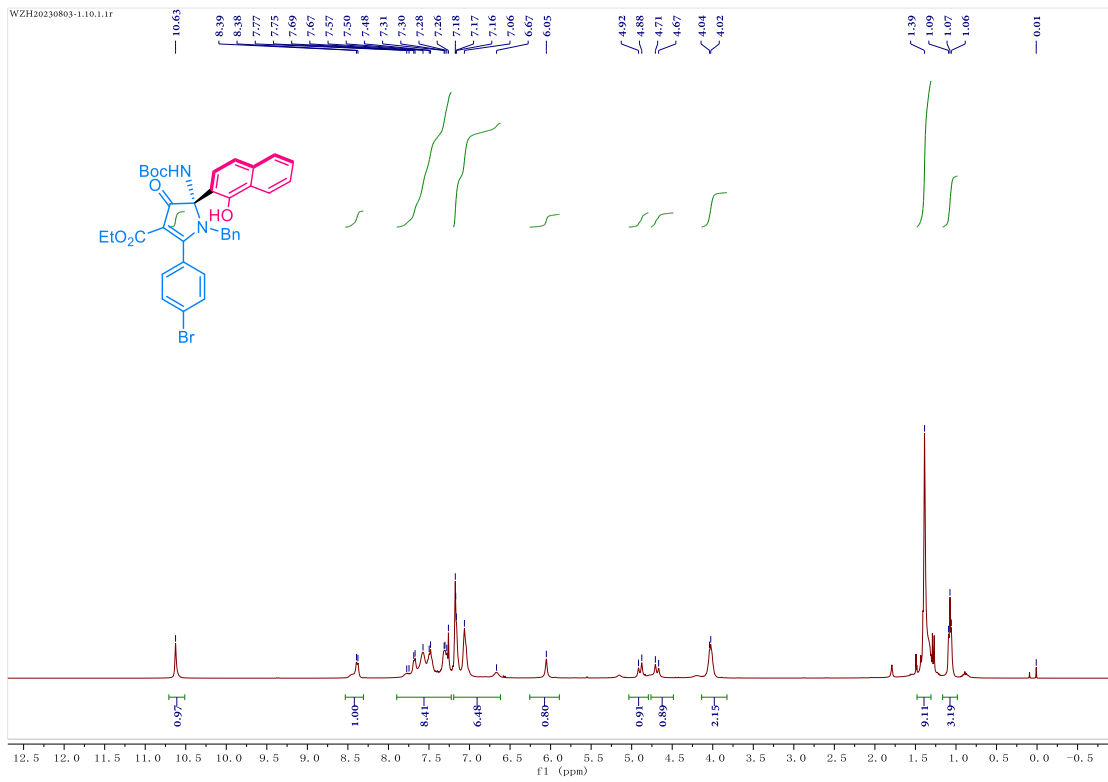

### <sup>13</sup>C NMR (101 MHz, CDCl<sub>3</sub>) of 3fa

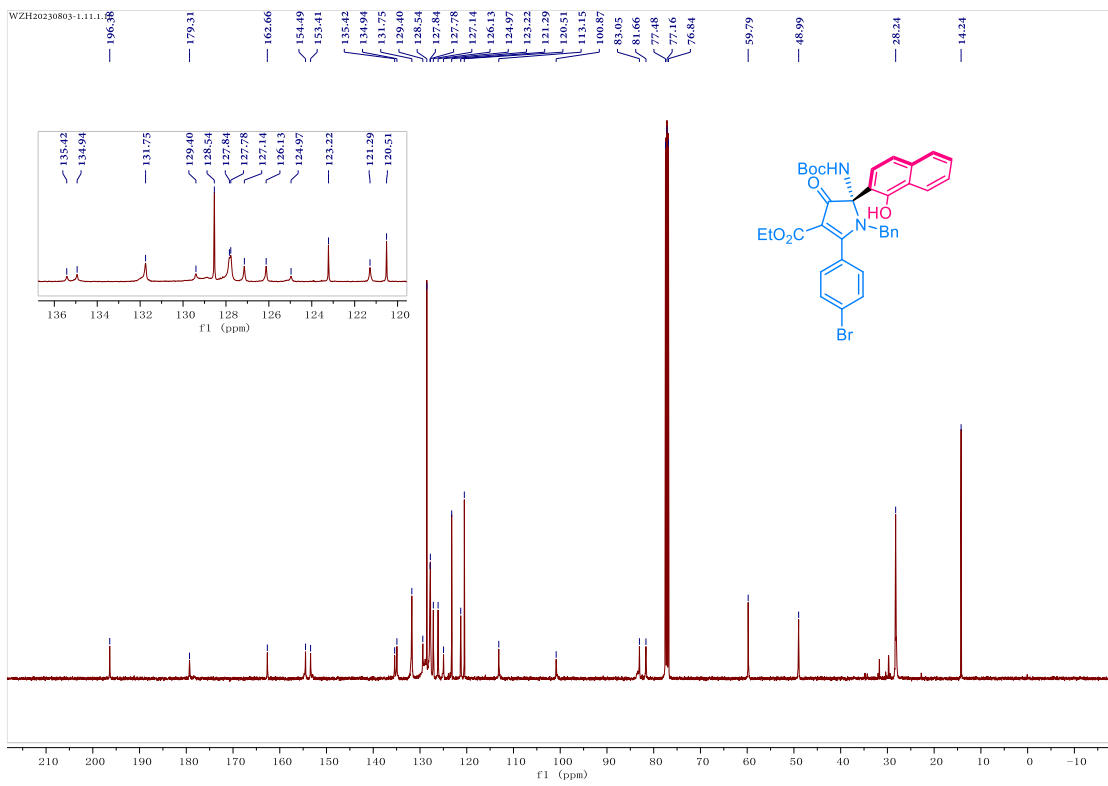

### HPLC spectra of 3fa

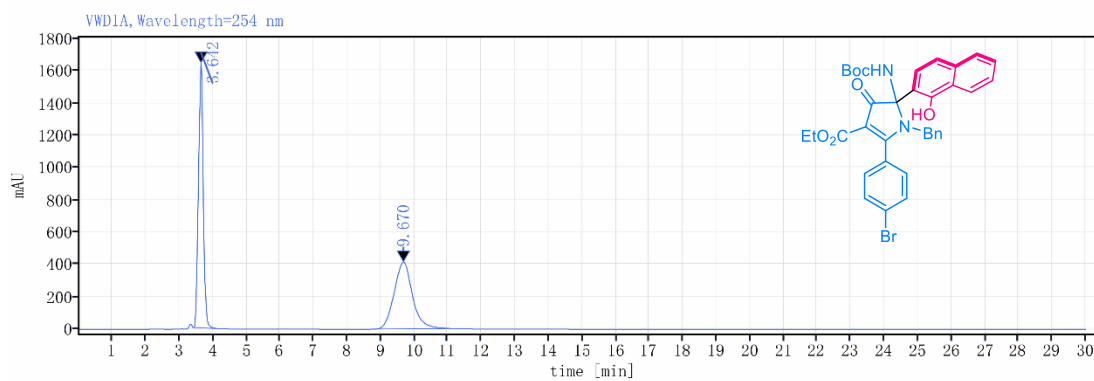

Detector VWD1A, Wavelength=254 nm

| Peak | Ret.Time [min] | Area     | Height  | Area%  |
|------|----------------|----------|---------|--------|
|      | 3.642          | 16179.49 | 1639.90 | 50.79  |
|      | 9.670          | 15673.39 | 413.93  | 49.21  |
|      |                | 31852.88 |         | 100.00 |

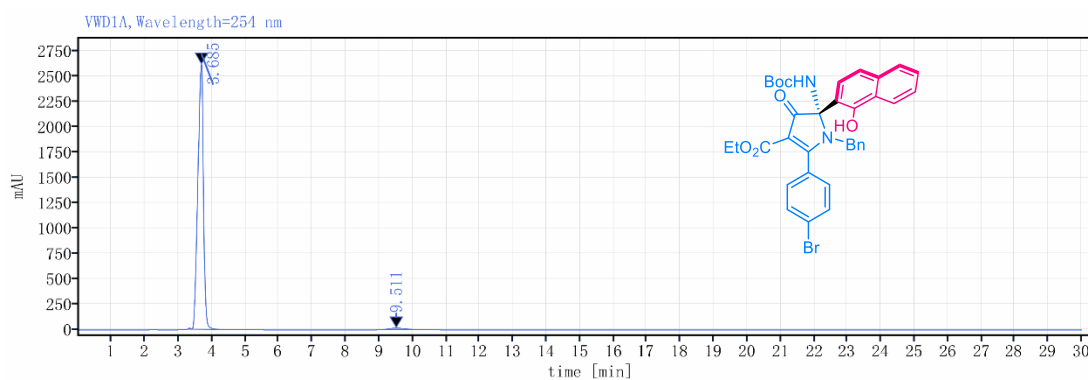

Detector VWD1A, Wavelength=254 nm

| Peak | Ret.Time [min] | Area     | Height  | Area%  |
|------|----------------|----------|---------|--------|
|      | 3.685          | 30434.72 | 2609.47 | 98.35  |
|      | 9.511          | 509.55   | 15.54   | 1.65   |
|      |                | 30944.28 |         | 100.00 |

### <sup>1</sup>H NMR (400 MHz, CDCl<sub>3</sub>) of 3ga

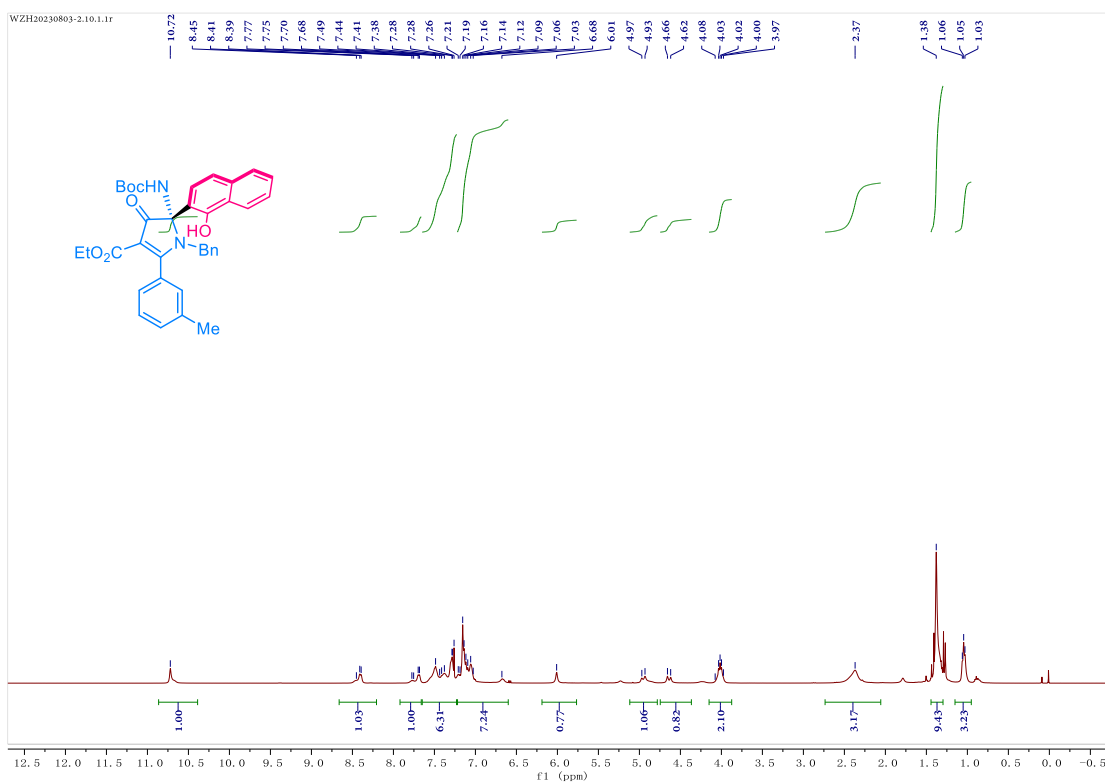

### <sup>13</sup>C NMR (101 MHz, CDCl<sub>3</sub>) of 3ga

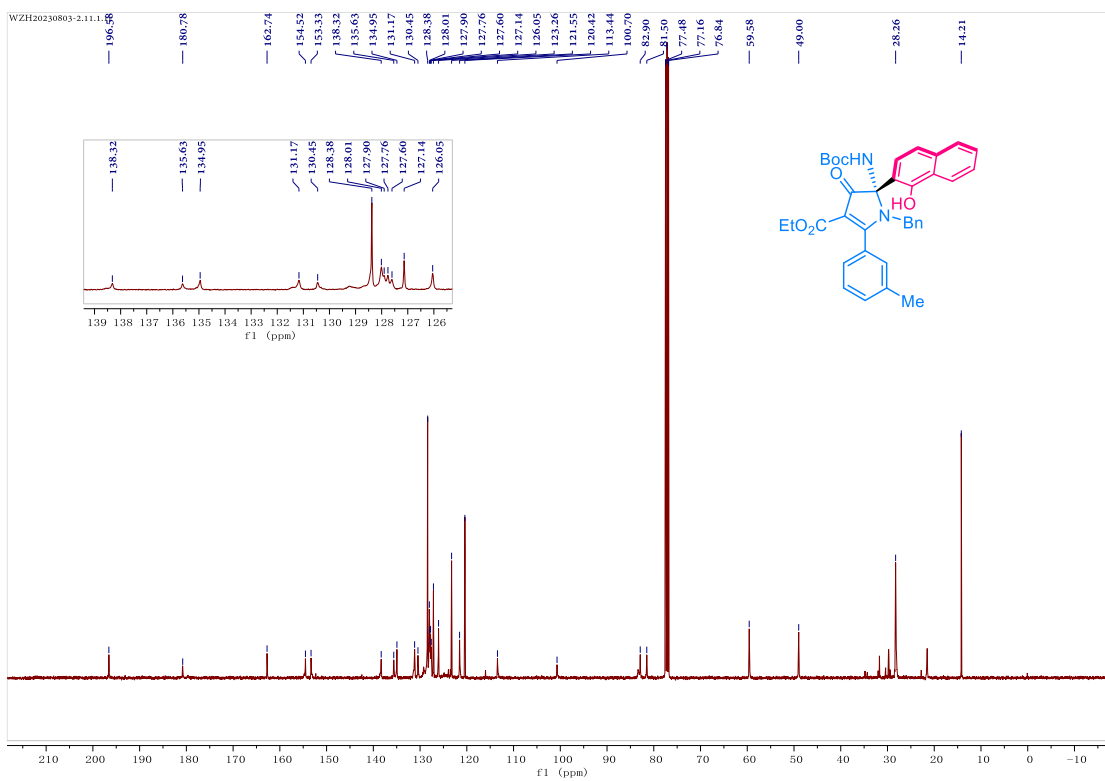

## HPLC spectra of 3ga

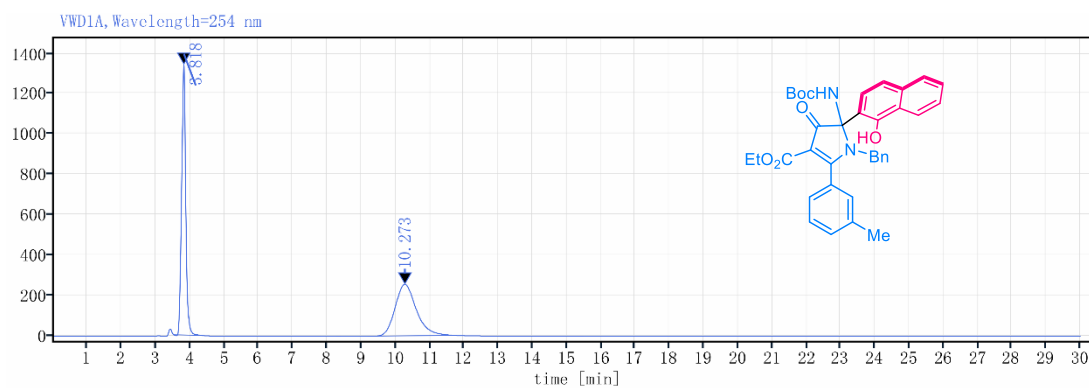

Detector VWD1A, Wavelength=254 nm

| Peak | Ret.Time [min] | Area     | Height  | Area%  |
|------|----------------|----------|---------|--------|
|      | 3.818          | 11169.10 | 1339.40 | 50.40  |
|      | 10.273         | 10991.92 | 255.34  | 49.60  |
|      |                | 22161.03 |         | 100.00 |

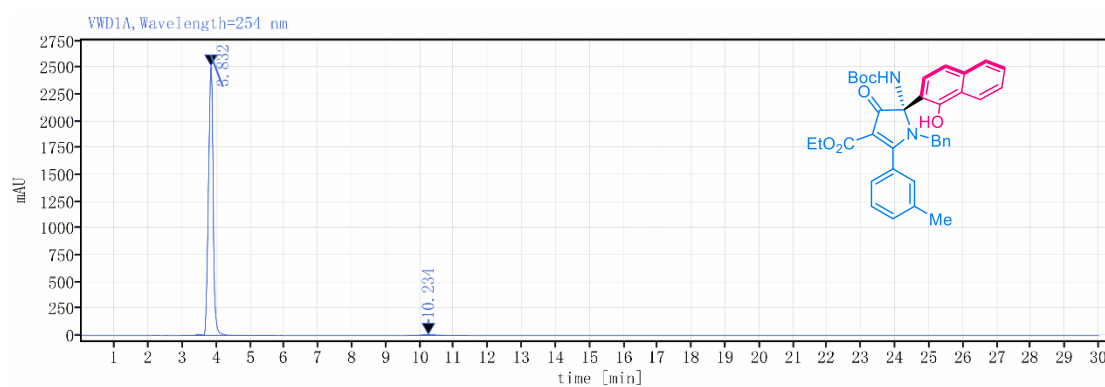

Detector VWD1A, Wavelength=254 nm

| Peak | Ret.Time [min] | Area     | Height  | Area%  |
|------|----------------|----------|---------|--------|
|      | 3.832          | 24519.22 | 2515.49 | 98.97  |
|      | 10.234         | 255.14   | 7.48    | 1.03   |
|      |                | 24774.35 |         | 100.00 |



### <sup>19</sup>F NMR (377 MHz, CDCl<sub>3</sub>) of **3ha**

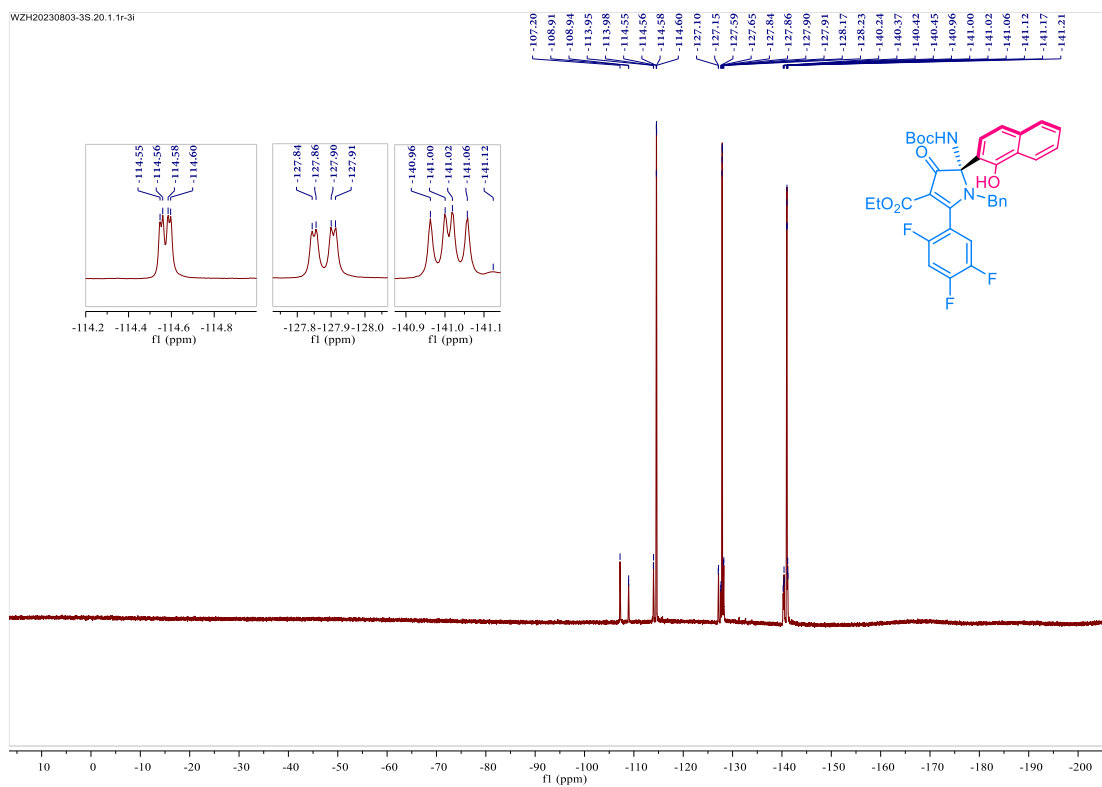

### HPLC spectra of **3ha**

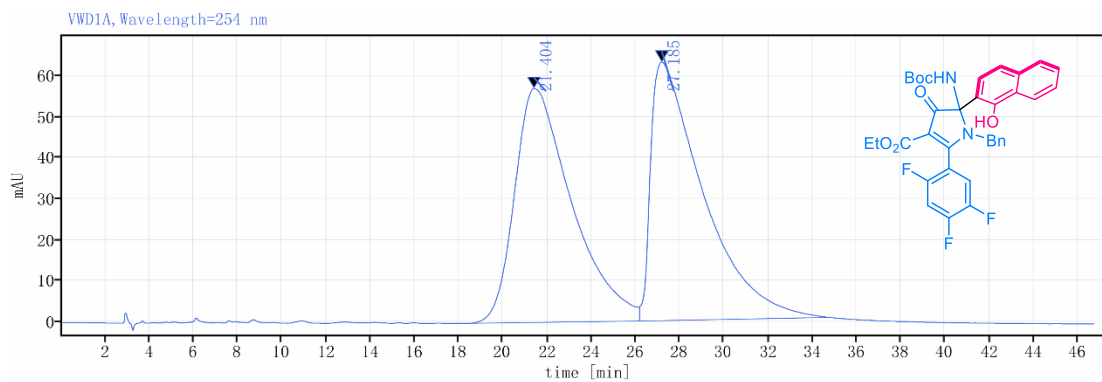

Detector VWD1A, Wavelength=254 nm

| Peak | Ret. Time [min] | Area     | Height | Area%  |
|------|-----------------|----------|--------|--------|
|      | 21.404          | 10263.39 | 56.99  | 49.78  |
|      | 27.185          | 10352.95 | 62.95  | 50.22  |
|      |                 | 20616.34 |        | 100.00 |



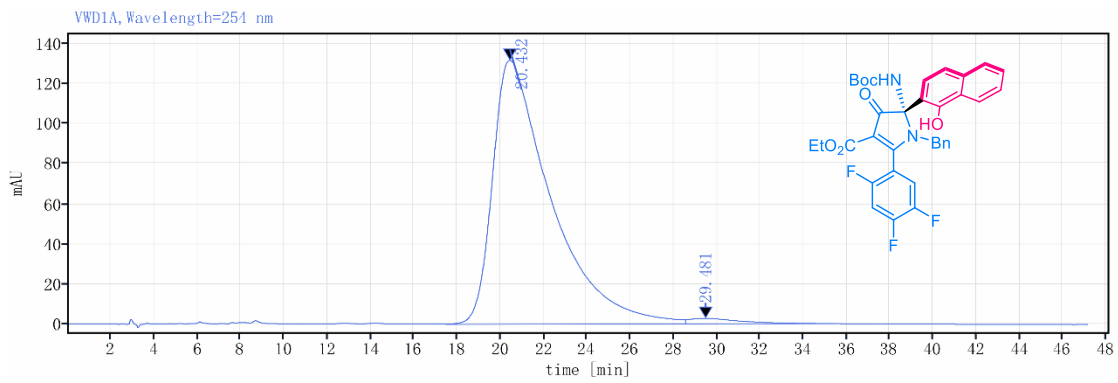

Detector VWD1A, Wavelength=254 nm

| Peak | Ret. Time [min] | Area     | Height | Area%  |
|------|-----------------|----------|--------|--------|
|      | 20.432          | 24750.74 | 131.94 | 98.19  |
|      | 29.481          | 455.85   | 2.74   | 1.81   |
|      |                 | 25206.59 |        | 100.00 |

### <sup>1</sup>H NMR (400 MHz, CDCl<sub>3</sub>) of 3ia

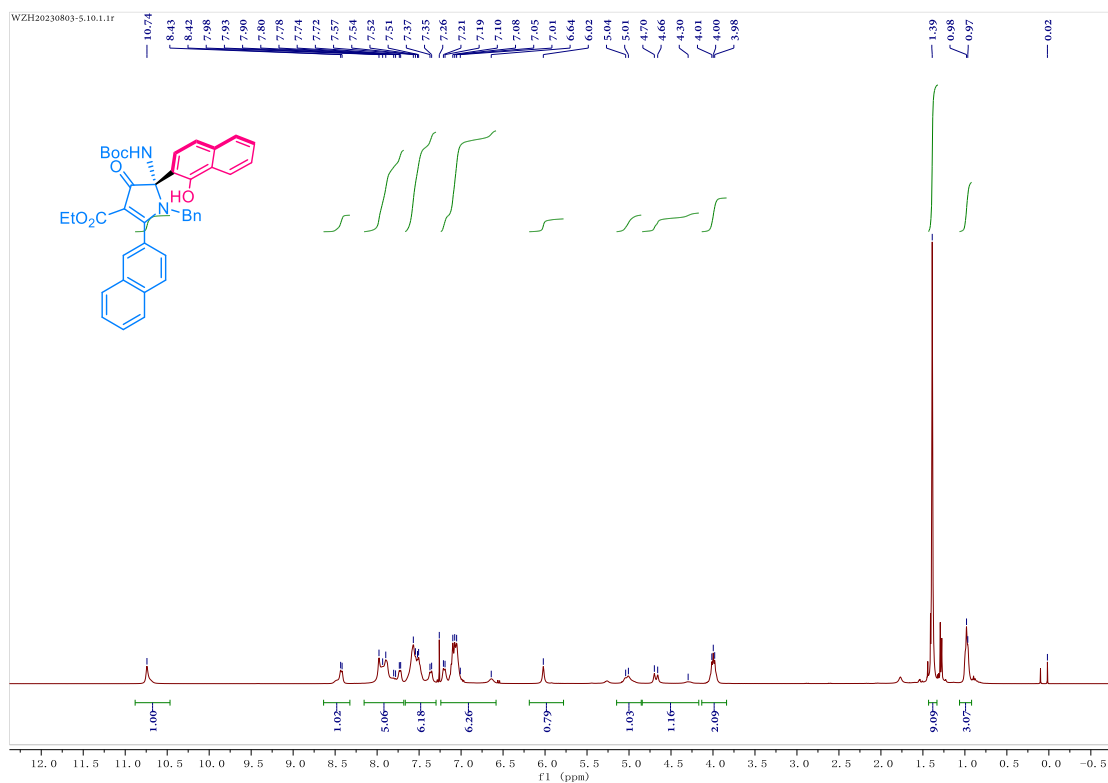

### <sup>13</sup>C NMR (101 MHz, CDCl<sub>3</sub>) of 3ia

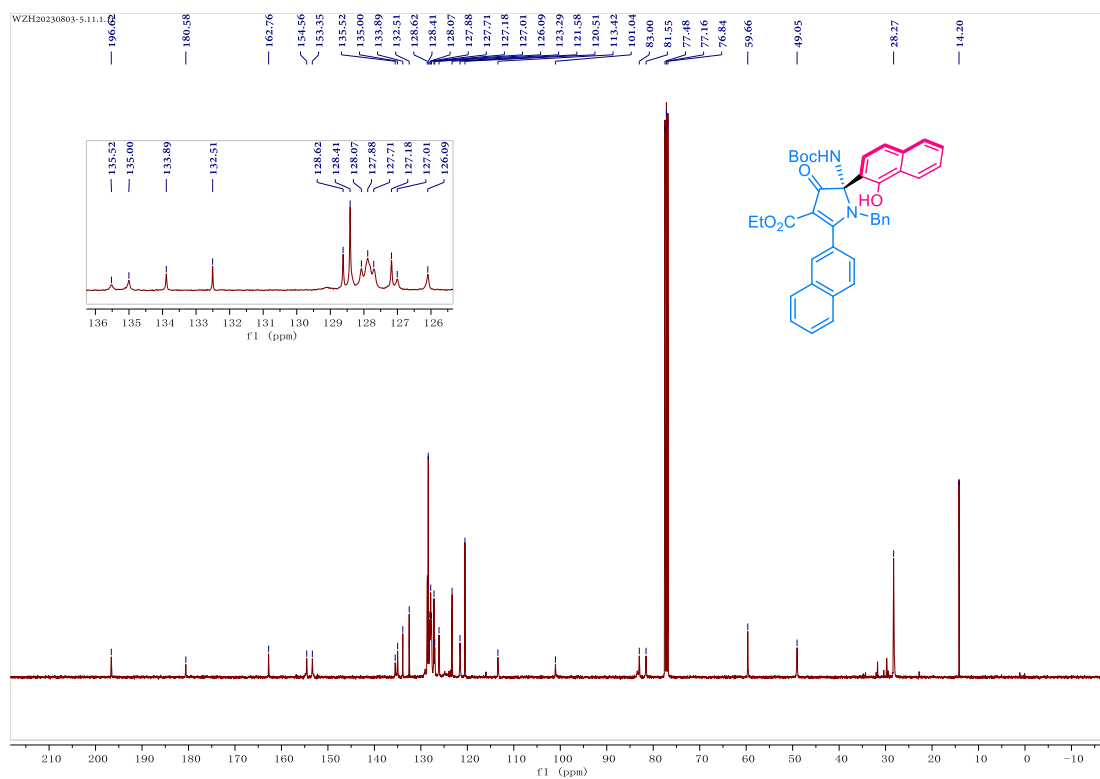

### HPLC spectra of 3ia

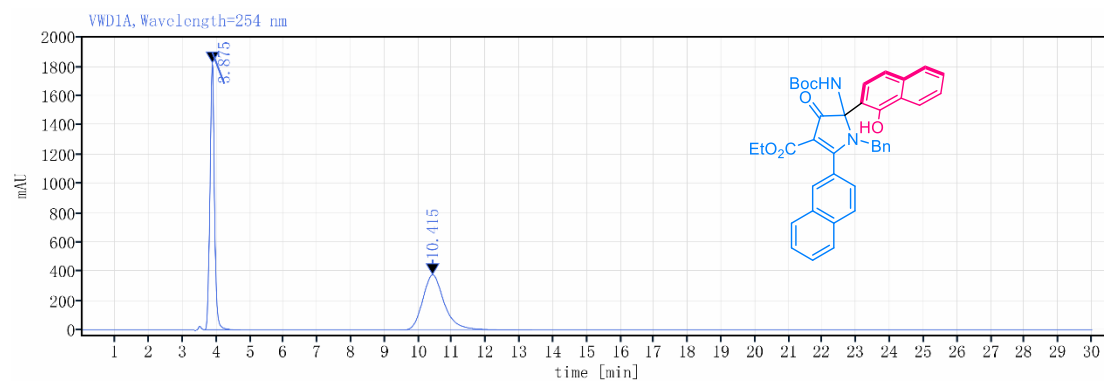

Detector VWD1A, Wavelength=254 nm

| Peak | Ret. Time [min] | Area     | Height  | Area%  |
|------|-----------------|----------|---------|--------|
|      | 3.875           | 16993.17 | 1822.24 | 49.96  |
|      | 10.415          | 17020.76 | 378.24  | 50.04  |
|      |                 | 34013.94 |         | 100.00 |

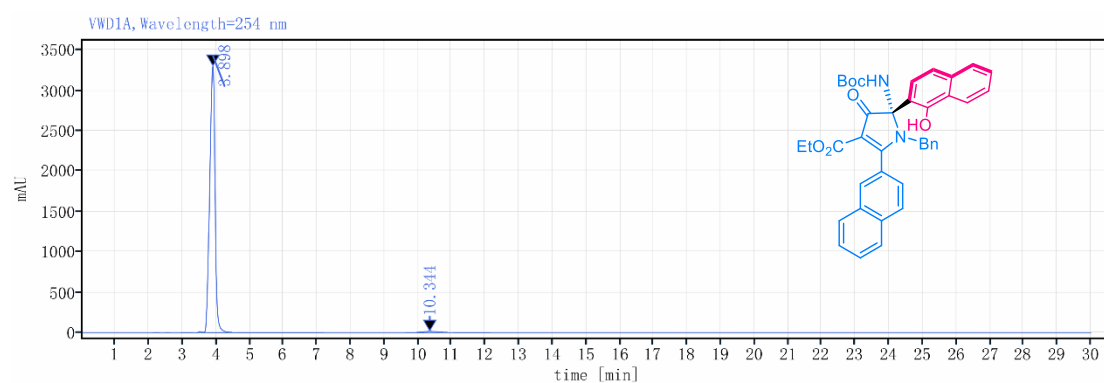

Detector VWD1A, Wavelength=254 nm

| Peak | Ret. Time [min] | Area     | Height  | Area%  |
|------|-----------------|----------|---------|--------|
|      | 3.898           | 36751.58 | 3299.77 | 98.38  |
|      | 10.344          | 604.84   | 16.56   | 1.62   |
|      |                 | 37356.42 |         | 100.00 |

<sup>1</sup>H NMR (400 MHz, CDCl<sub>3</sub>) of **3ja**

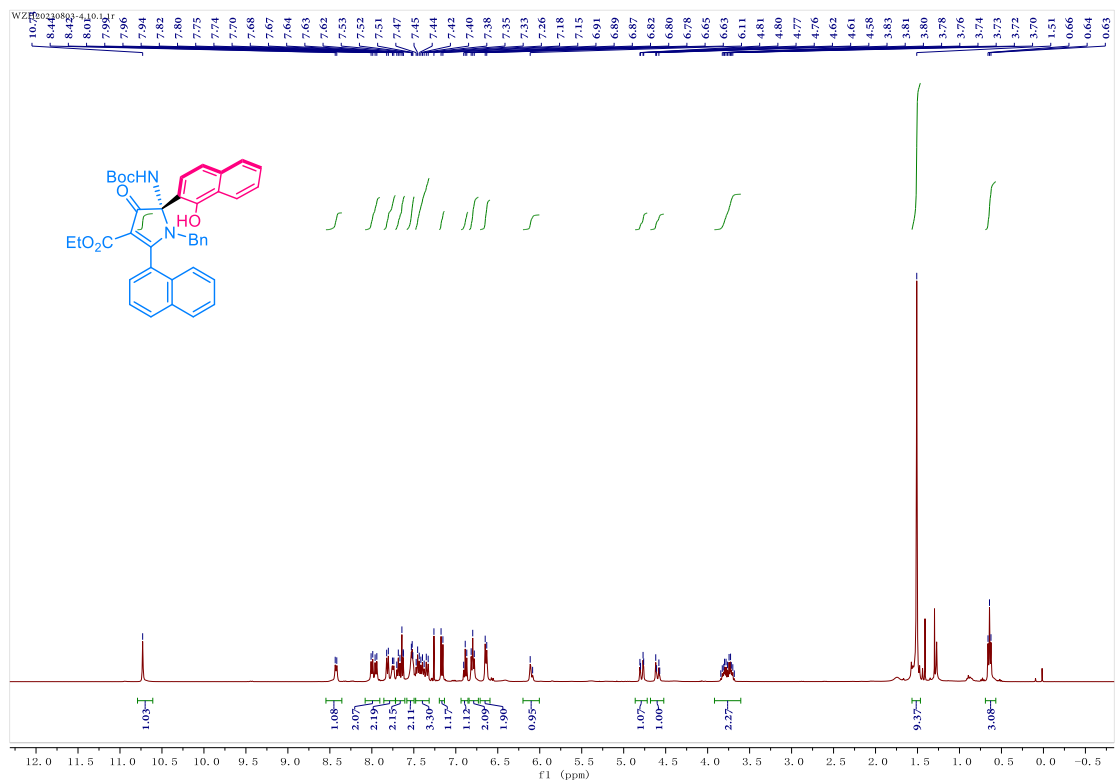

<sup>13</sup>C NMR (101 MHz, CDCl<sub>3</sub>) of **3ja**

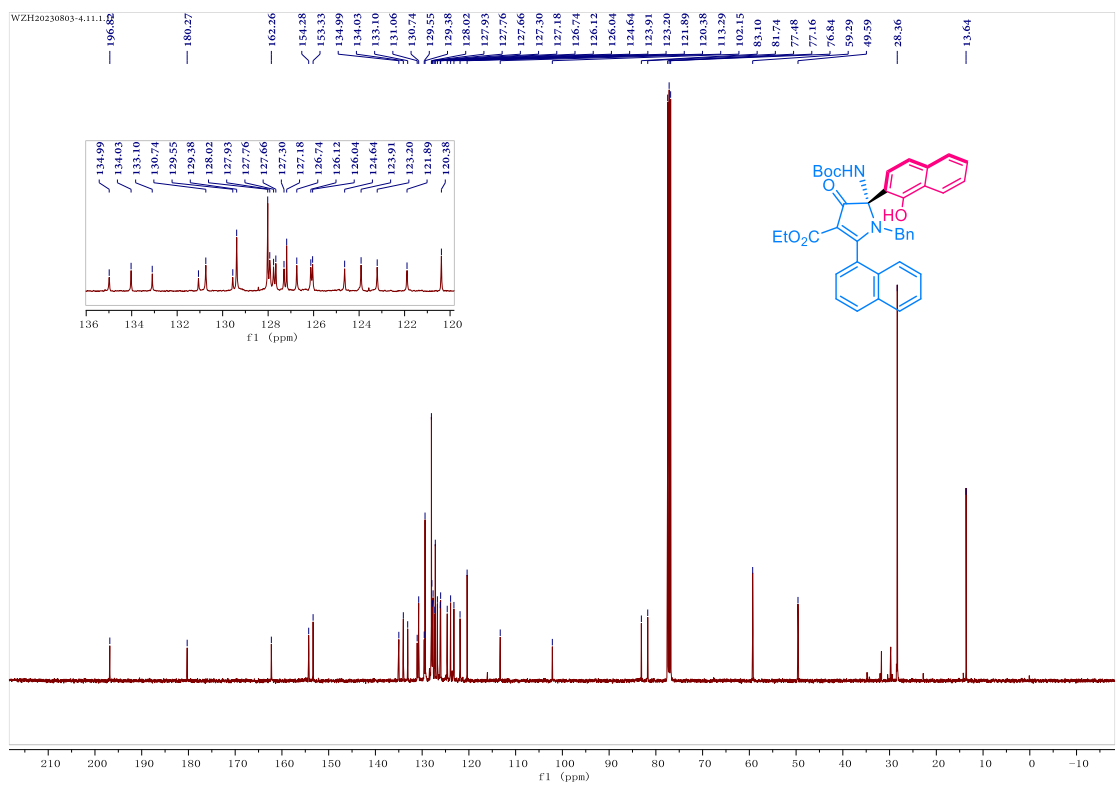

### HPLC spectra of 3ja

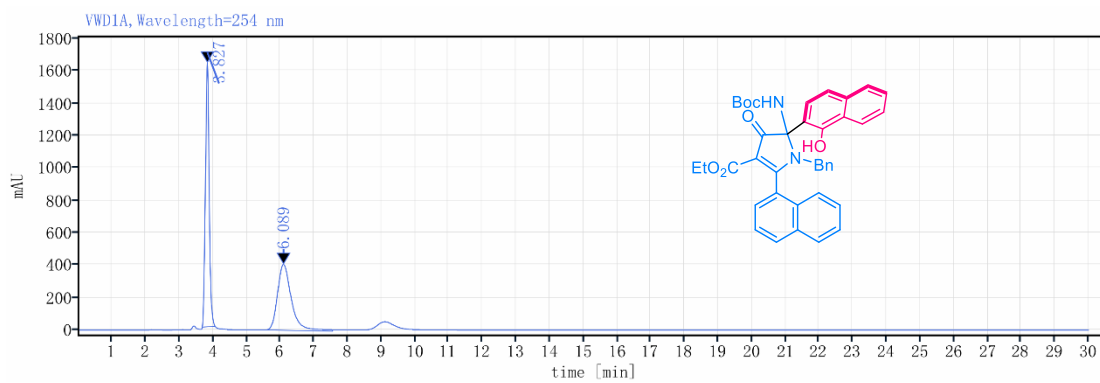

Detector VWD1A, Wavelength=254 nm

| Peak | Ret.Time [min] | Area     | Height  | Area%  |
|------|----------------|----------|---------|--------|
|      | 3.827          | 12606.99 | 1628.08 | 51.85  |
|      | 6.089          | 11707.80 | 406.57  | 48.15  |
|      |                | 24314.79 |         | 100.00 |

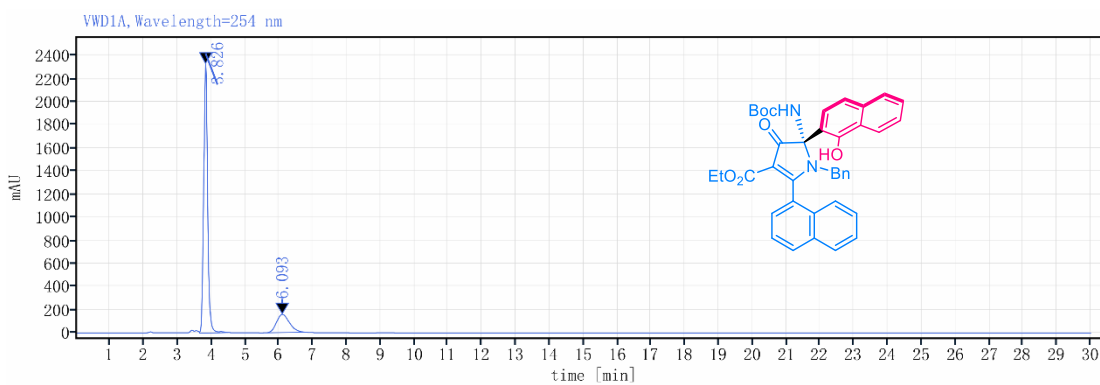

Detector VWD1A, Wavelength=254 nm

| Peak | Ret.Time [min] | Area     | Height  | Area%  |
|------|----------------|----------|---------|--------|
|      | 3.826          | 18914.77 | 2332.40 | 81.83  |
|      | 6.093          | 4200.33  | 157.53  | 18.17  |
|      |                | 23115.10 |         | 100.00 |

<sup>1</sup>H NMR (400 MHz, CDCl<sub>3</sub>) of **3ka**

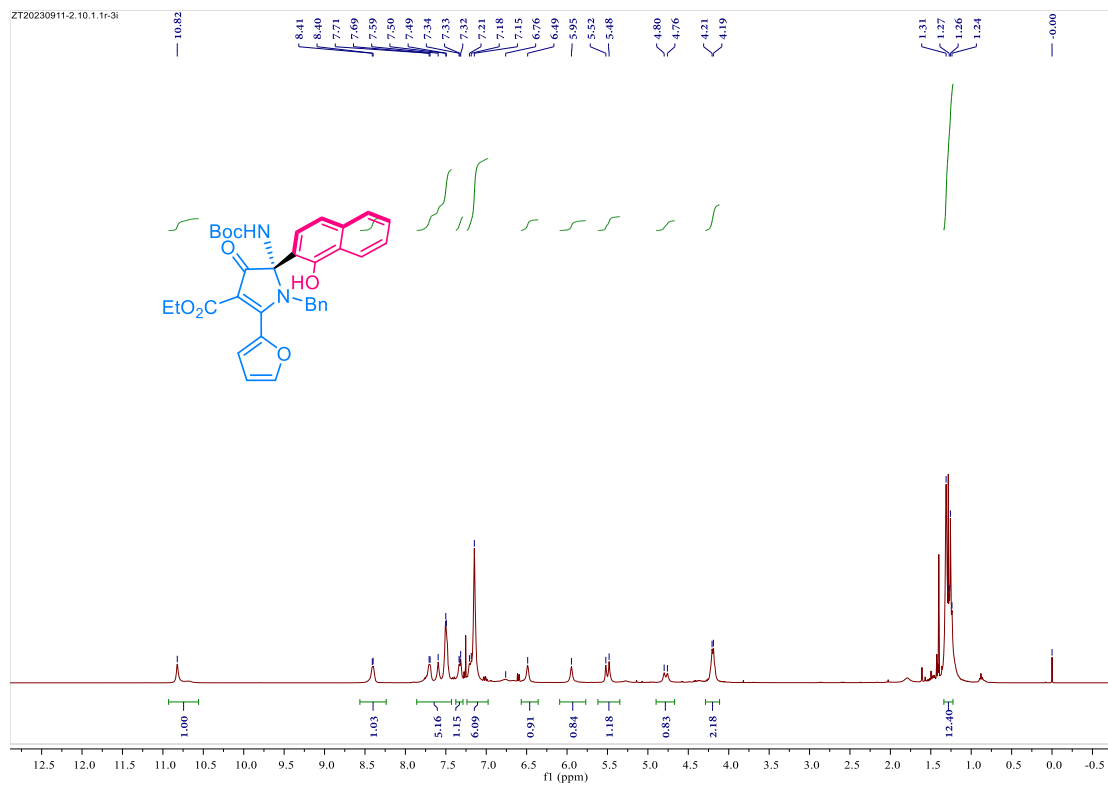

<sup>13</sup>C NMR (101 MHz, CDCl<sub>3</sub>) of **3ka**

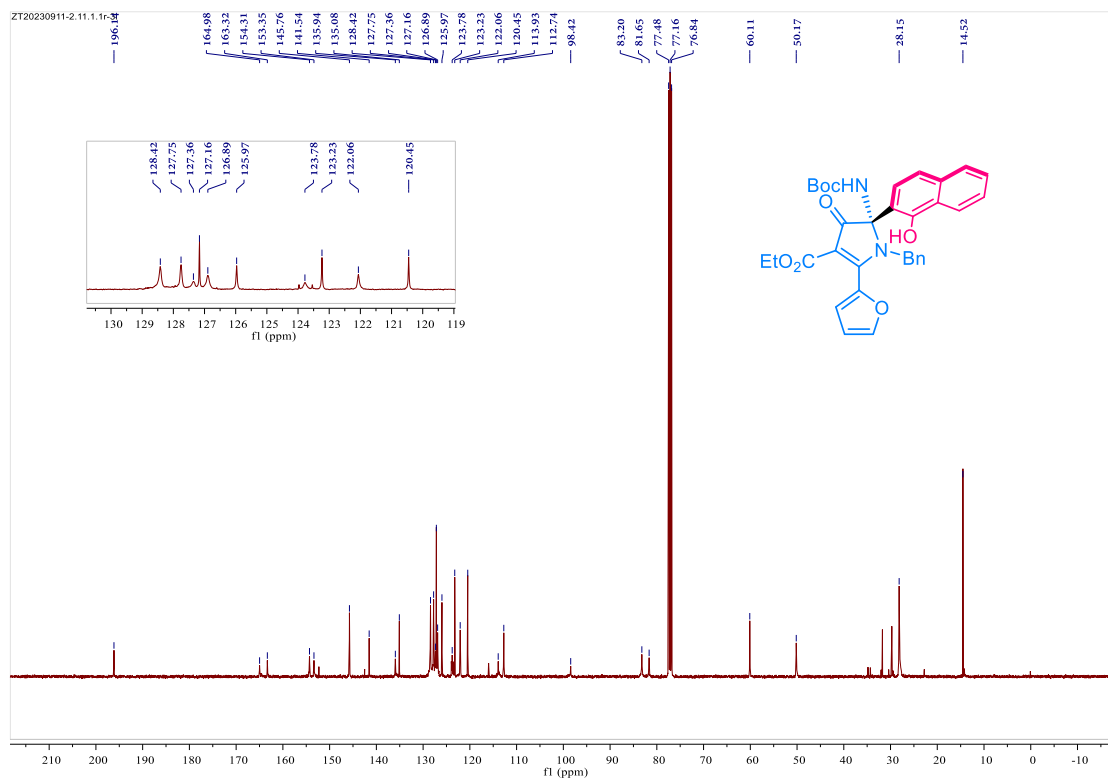

## HPLC spectra of 3ka

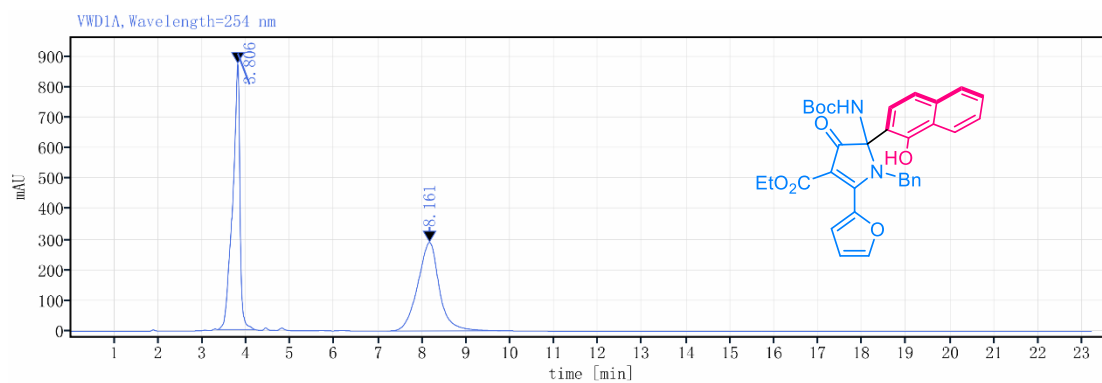

Detector VWD1A, Wavelength=254 nm

| Peak | Ret.Time [min] | Area     | Height | Area%  |
|------|----------------|----------|--------|--------|
|      | 3.806          | 9953.25  | 870.16 | 50.19  |
|      | 8.161          | 9878.62  | 289.85 | 49.81  |
|      |                | 19831.87 |        | 100.00 |

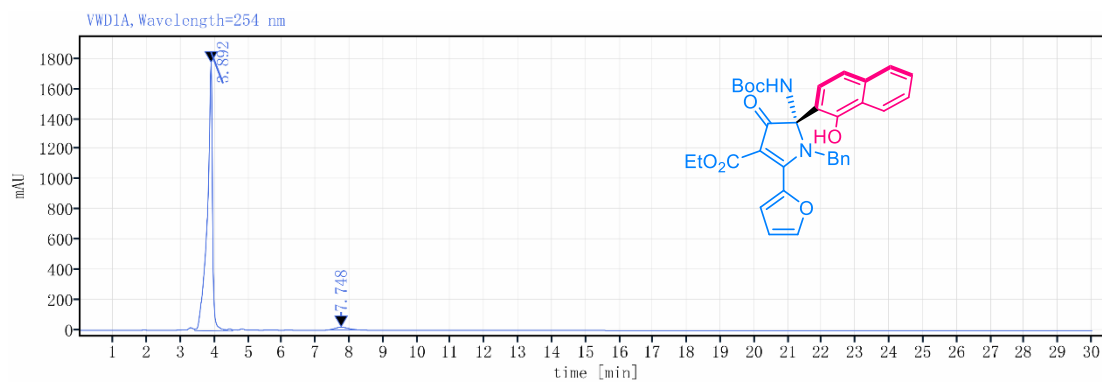

Detector VWD1A, Wavelength=254 nm

| Peak | Ret.Time [min] | Area     | Height  | Area%  |
|------|----------------|----------|---------|--------|
|      | 3.892          | 19308.95 | 1775.41 | 97.56  |
|      | 7.748          | 482.41   | 17.54   | 2.44   |
|      |                | 19791.36 |         | 100.00 |

### <sup>1</sup>H NMR (400 MHz, CDCl<sub>3</sub>) of 3a

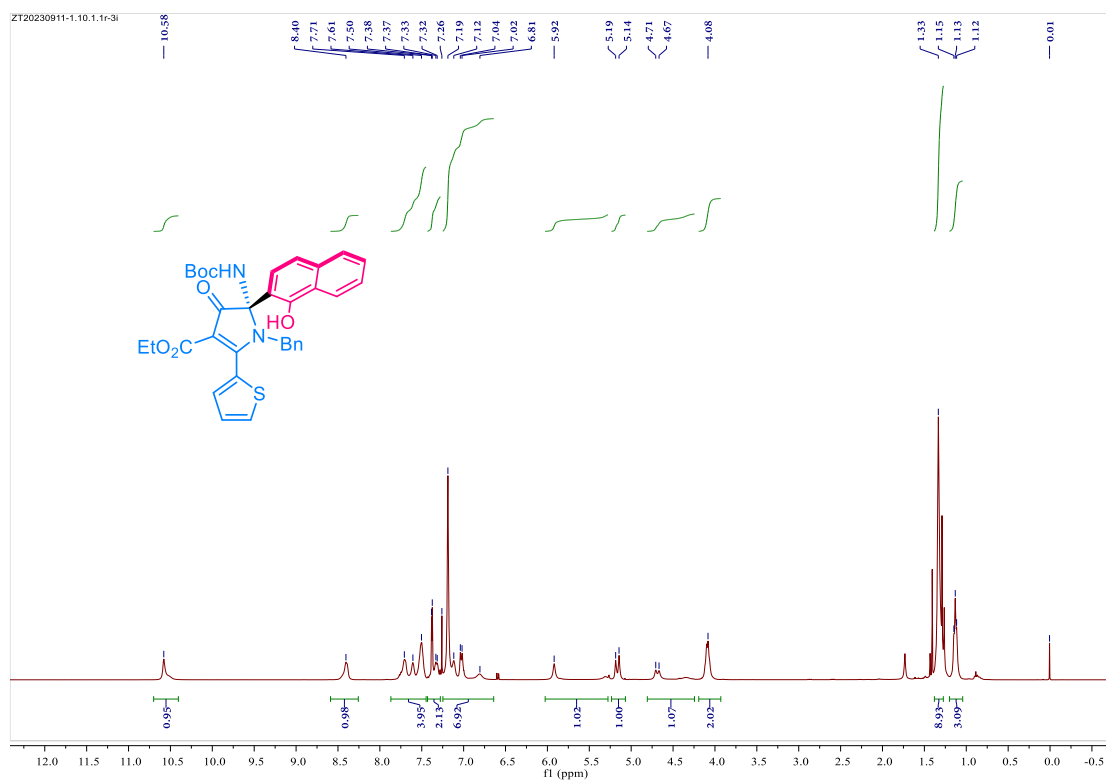

### <sup>13</sup>C NMR (101 MHz, CDCl<sub>3</sub>) of 3a

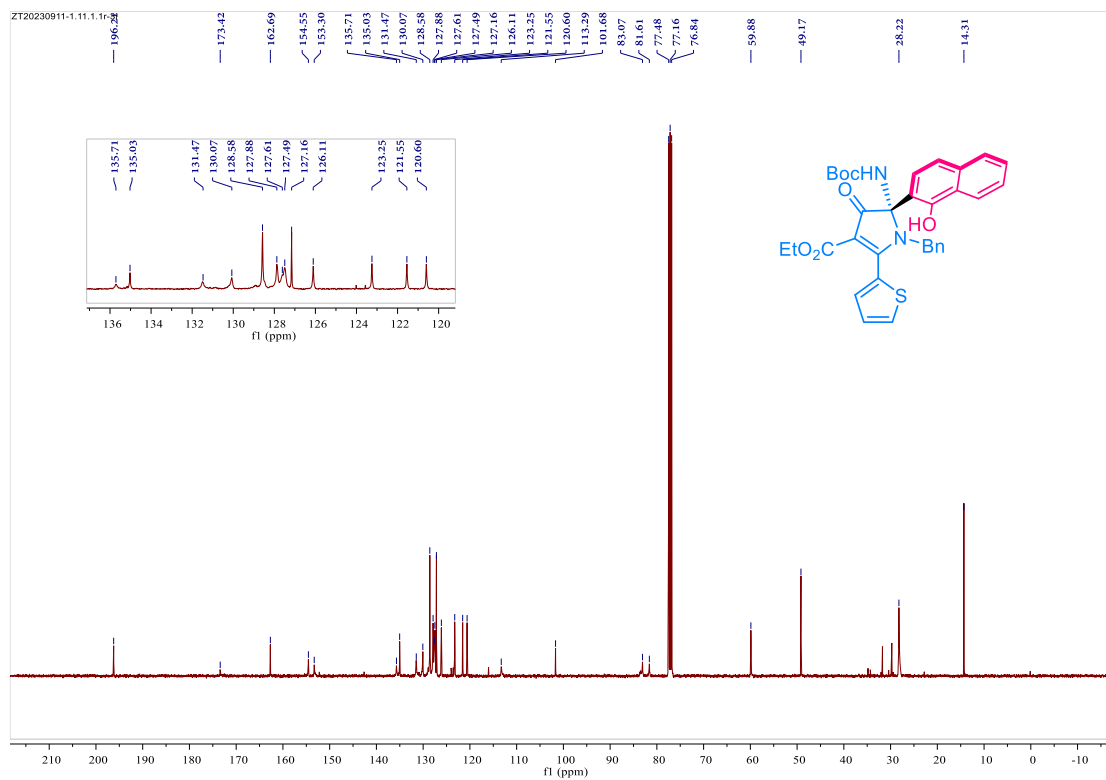



### HPLC spectra of 31a

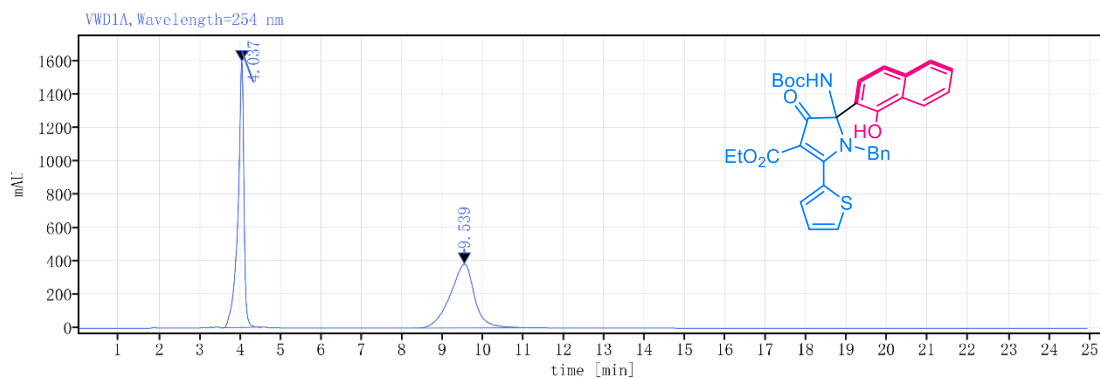

Detector VWD1A, Wavelength=254 nm

| Peak | Ret.Time [min] | Area     | Height  | Area%  |
|------|----------------|----------|---------|--------|
|      | 4.037          | 16295.96 | 1588.68 | 50.25  |
|      | 9.539          | 16135.76 | 382.38  | 49.75  |
|      |                | 32431.72 |         | 100.00 |

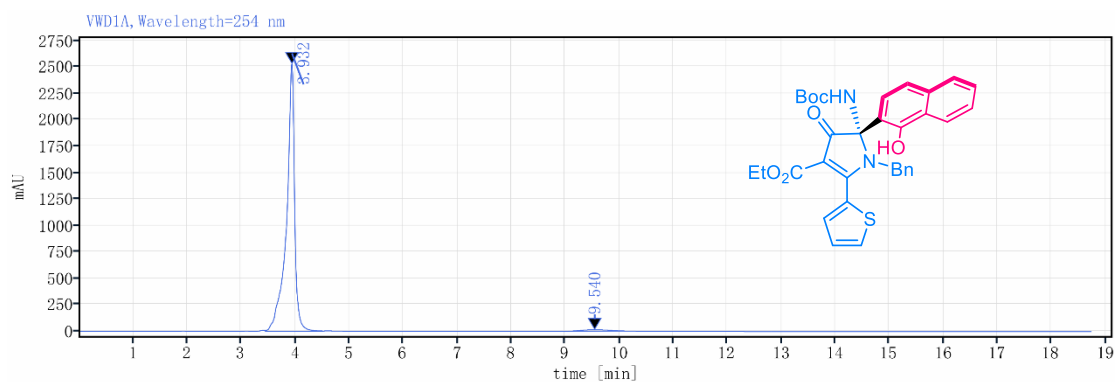

Detector VWD1A, Wavelength=254 nm

| Peak | Ret.Time [min] | Area     | Height  | Area%  |
|------|----------------|----------|---------|--------|
|      | 3.932          | 26463.85 | 2528.87 | 97.86  |
|      | 9.540          | 577.96   | 14.85   | 2.14   |
|      |                | 27041.80 |         | 100.00 |

<sup>1</sup>H NMR (400 MHz, CDCl<sub>3</sub>) of **3ma**

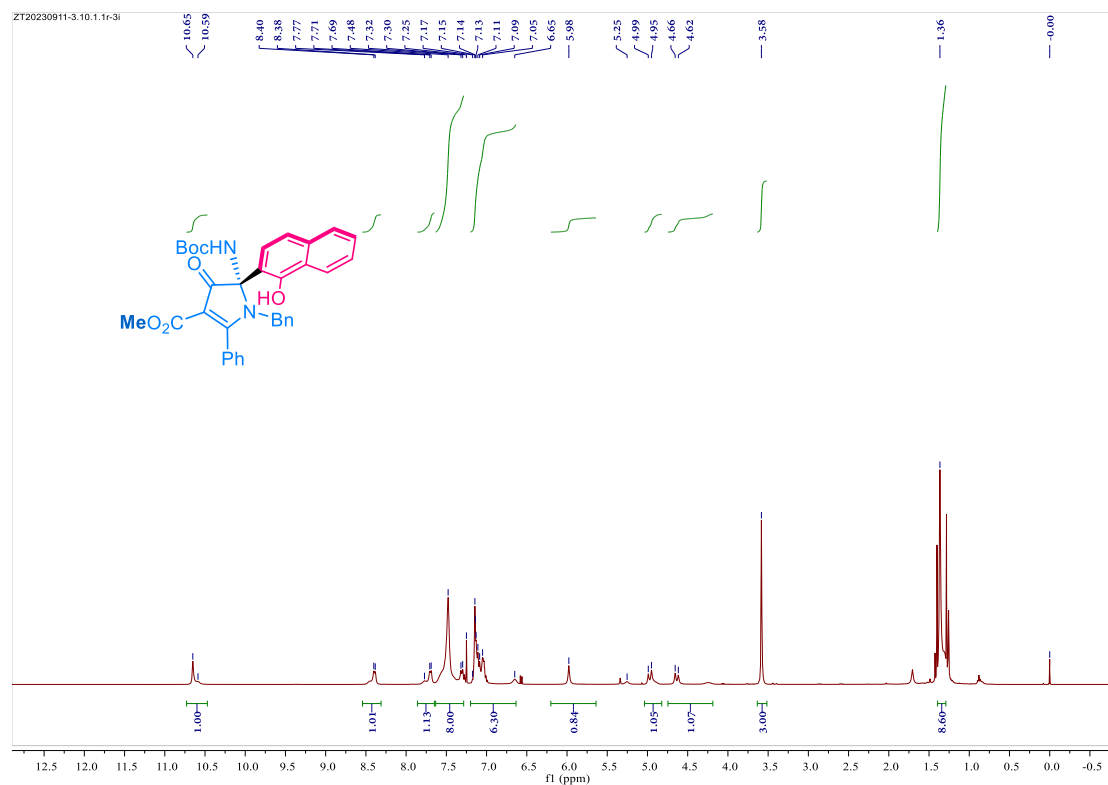

<sup>13</sup>C NMR (101 MHz, CDCl<sub>3</sub>) of **3ma**

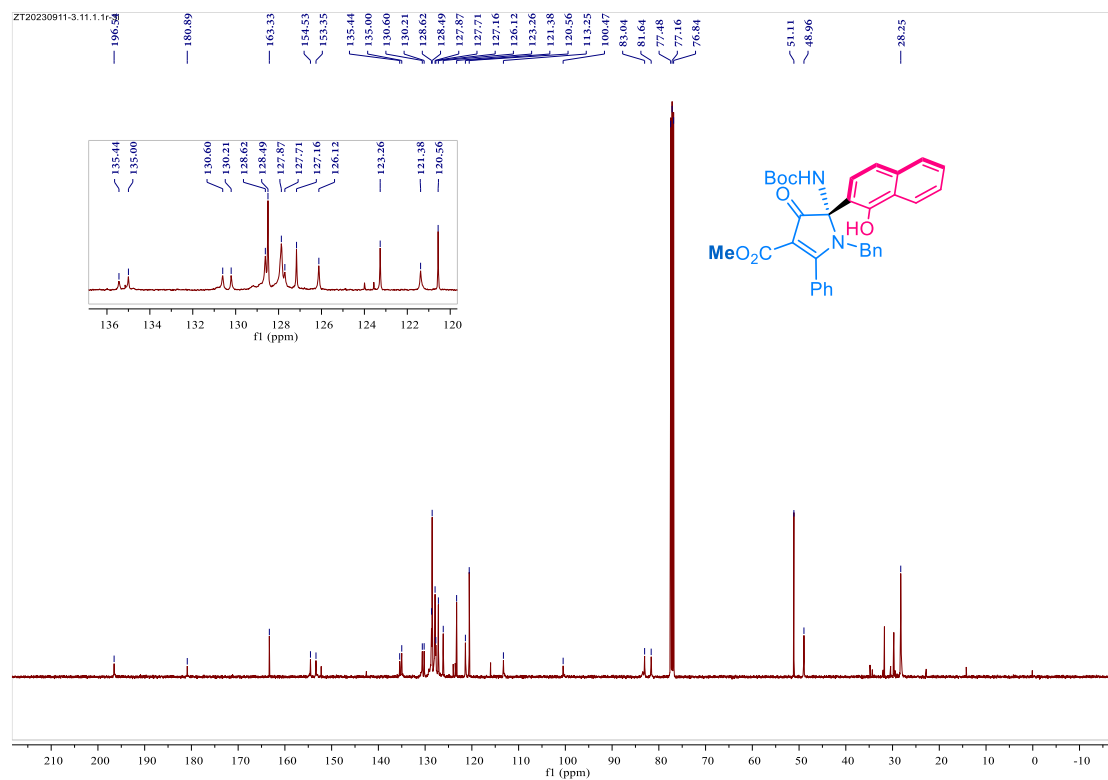

## HPLC spectra of **3ma**

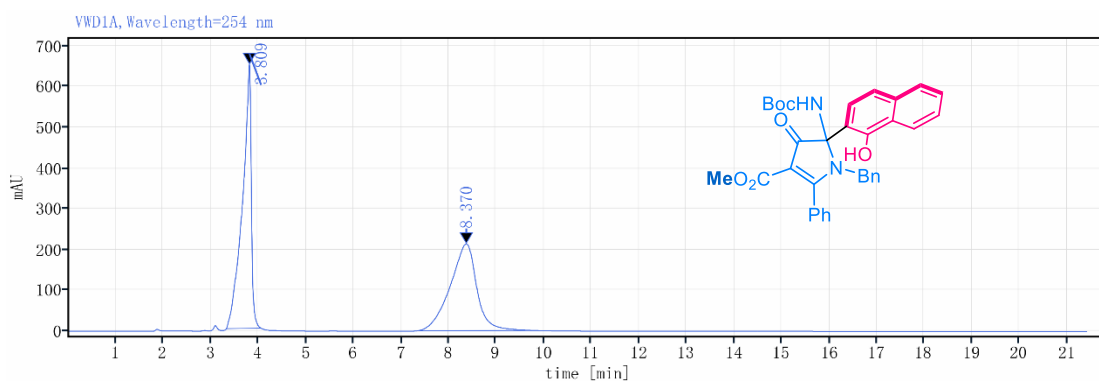

Detector VWD1A, Wavelength=254 nm

| Peak | Ret.Time [min] | Area     | Height | Area%  |
|------|----------------|----------|--------|--------|
|      | 3.809          | 8426.28  | 648.07 | 50.53  |
|      | 8.370          | 8250.48  | 213.06 | 49.47  |
|      |                | 16676.77 |        | 100.00 |

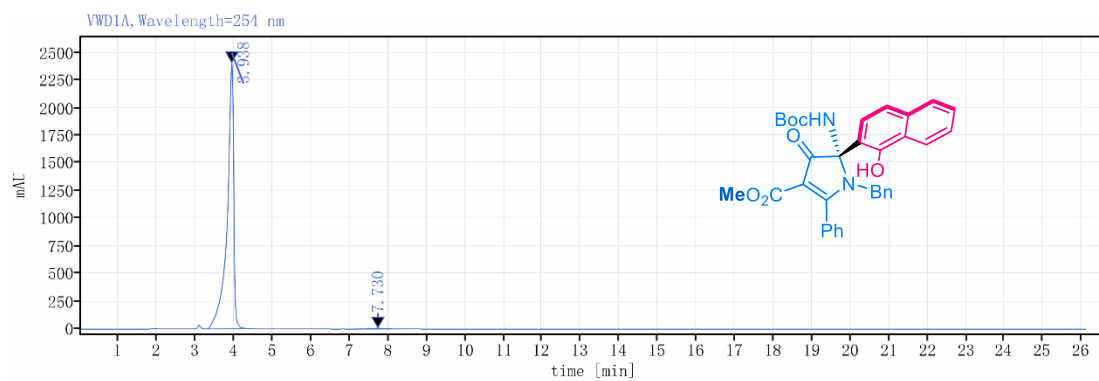

Detector VWD1A, Wavelength=254 nm

| Peak | Ret.Time [min] | Area     | Height  | Area%  |
|------|----------------|----------|---------|--------|
|      | 3.938          | 28457.14 | 2401.05 | 99.19  |
|      | 7.730          | 233.06   | 7.09    | 0.81   |
|      |                | 28690.21 |         | 100.00 |

<sup>1</sup>H NMR (400 MHz, CDCl<sub>3</sub>) of 3na

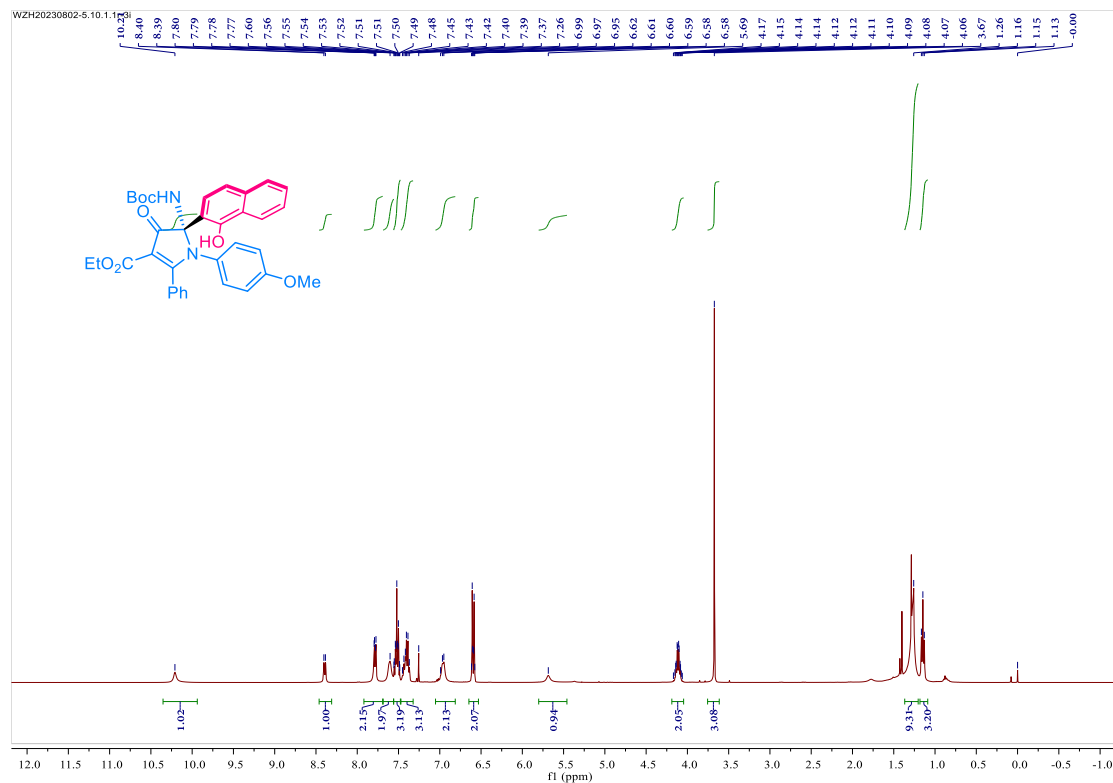

<sup>13</sup>C NMR (101 MHz, CDCl<sub>3</sub>) of 3na

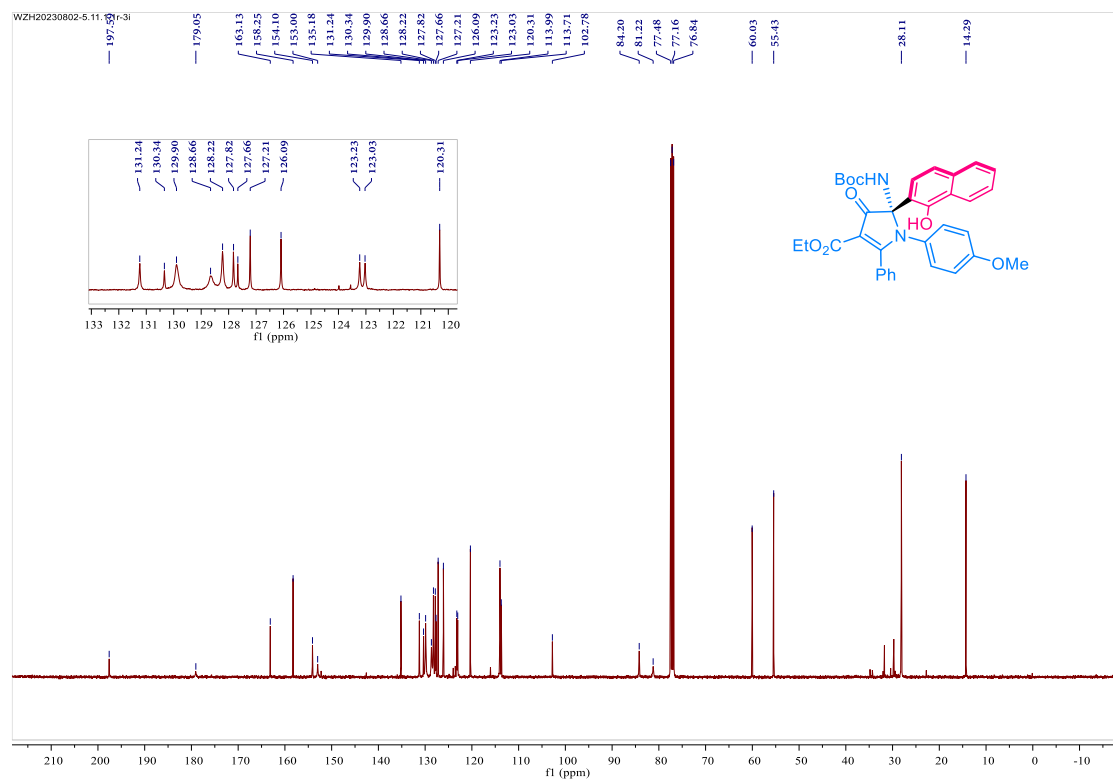

## HPLC spectra of 3na

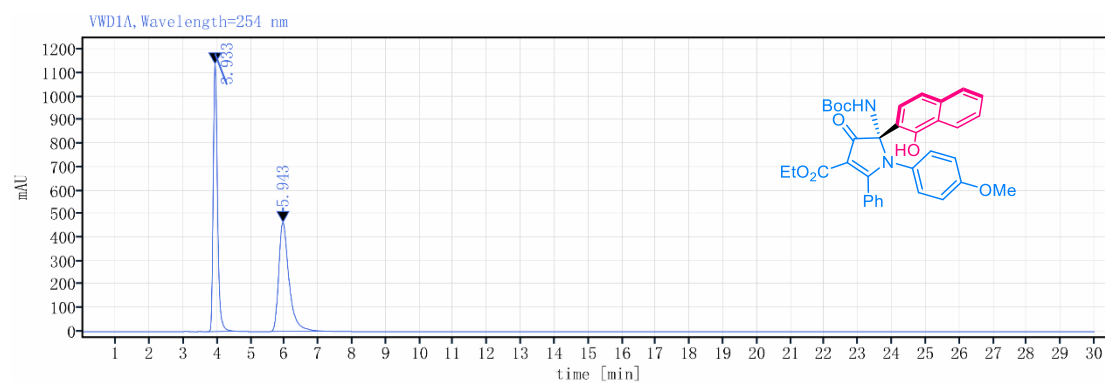

Detector VWD1A, Wavelength=254 nm

| Peak | Ret.Time [min] | Area     | Height  | Area%  |
|------|----------------|----------|---------|--------|
|      | 3.933          | 9955.58  | 1139.08 | 50.31  |
|      | 5.943          | 9832.24  | 463.13  | 49.69  |
|      |                | 19787.82 |         | 100.00 |

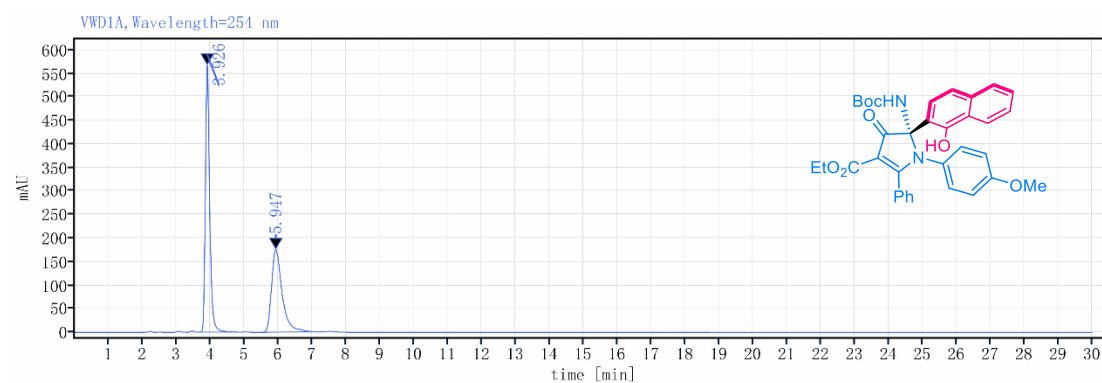

Detector VWD1A, Wavelength=254 nm

| Peak | Ret.Time [min] | Area    | Height | Area%  |
|------|----------------|---------|--------|--------|
|      | 3.926          | 4996.40 | 566.90 | 56.74  |
|      | 5.947          | 3809.18 | 175.47 | 43.26  |
|      |                | 8805.58 |        | 100.00 |

### <sup>1</sup>H NMR (400 MHz, CDCl<sub>3</sub>) of **3ab**

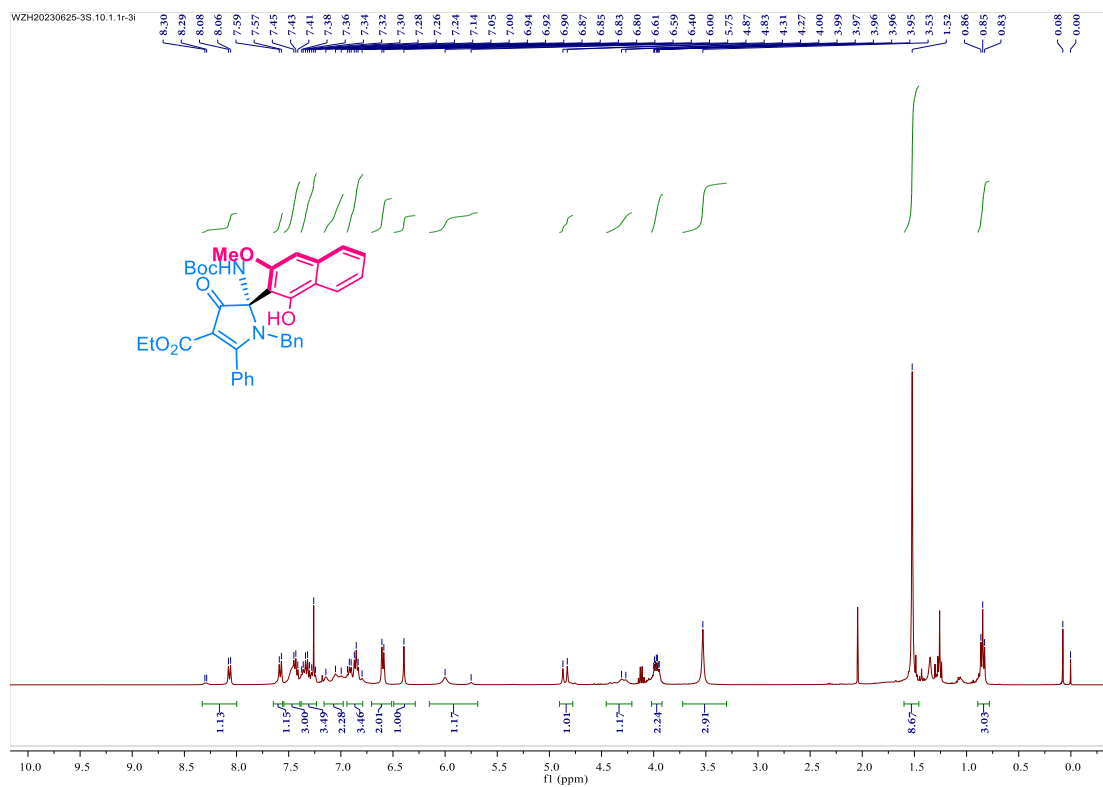

### <sup>13</sup>C NMR (101 MHz, CDCl<sub>3</sub>) of **3ab**

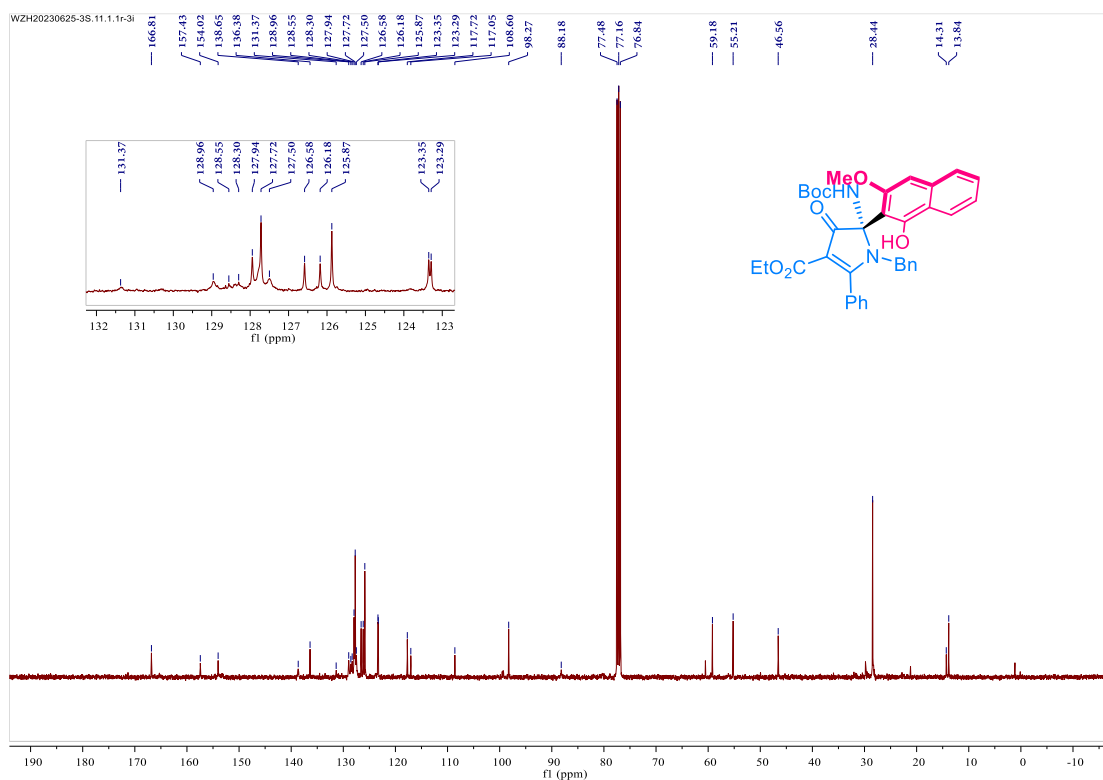

## HPLC spectra of **3ab**

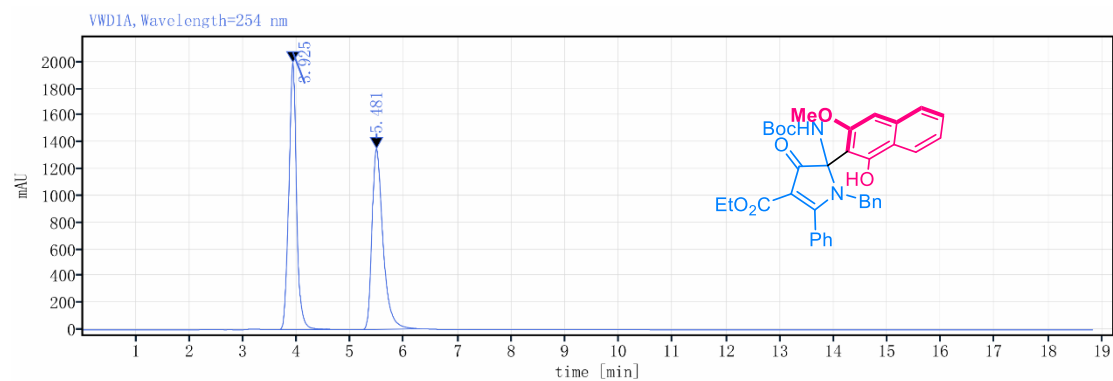

Detector VWD1A, Wavelength=254 nm

| Peak | Ret. Time [min] | Area     | Height  | Area%  |
|------|-----------------|----------|---------|--------|
|      | 3.925           | 19804.79 | 1992.30 | 50.66  |
|      | 5.481           | 19285.33 | 1348.34 | 49.34  |
|      |                 | 39090.12 |         | 100.00 |

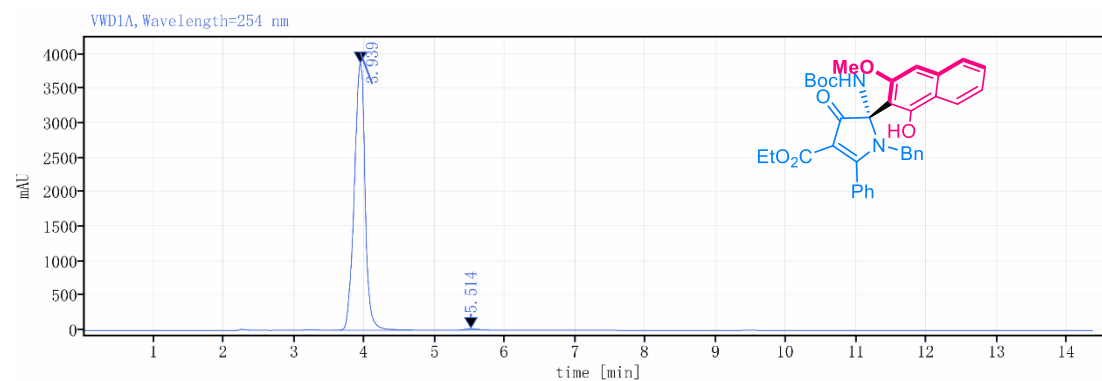

Detector VWD1A, Wavelength=254 nm

| Peak | Ret. Time [min] | Area     | Height  | Area%  |
|------|-----------------|----------|---------|--------|
|      | 3.939           | 41369.92 | 3865.06 | 99.42  |
|      | 5.514           | 239.59   | 19.46   | 0.58   |
|      |                 | 41609.51 |         | 100.00 |

<sup>1</sup>H NMR (400 MHz, CDCl<sub>3</sub>) of **3ac**

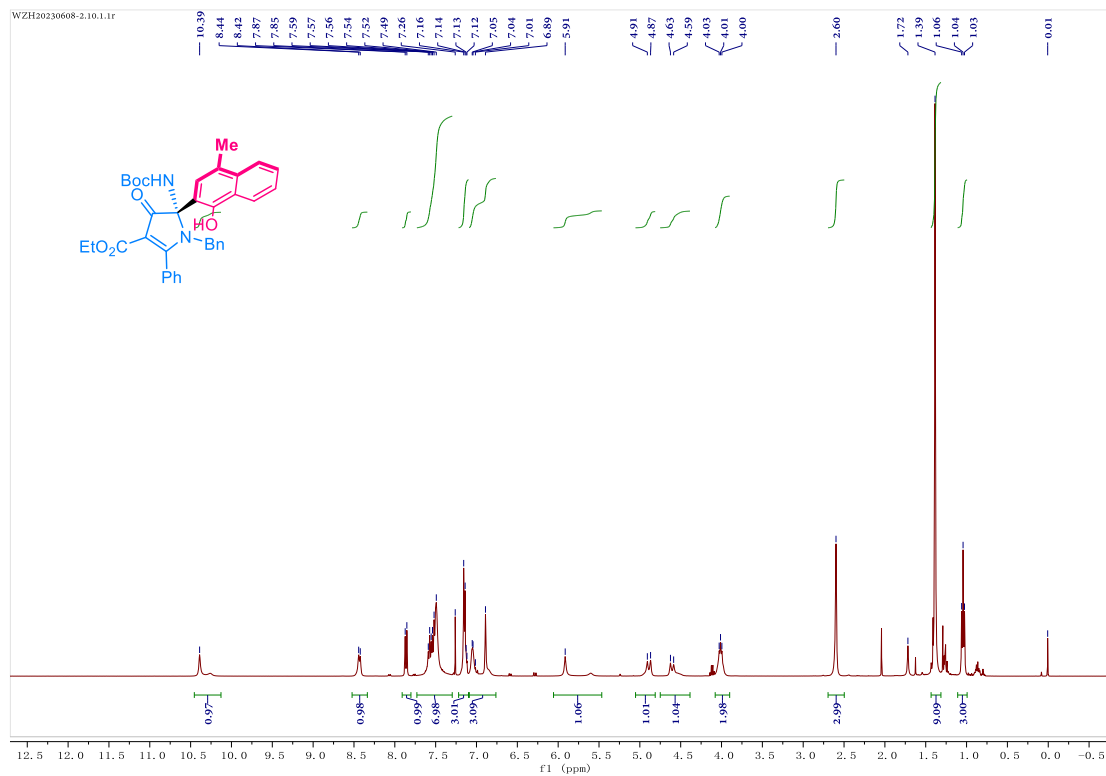

<sup>13</sup>C NMR (101 MHz, CDCl<sub>3</sub>) of **3ac**

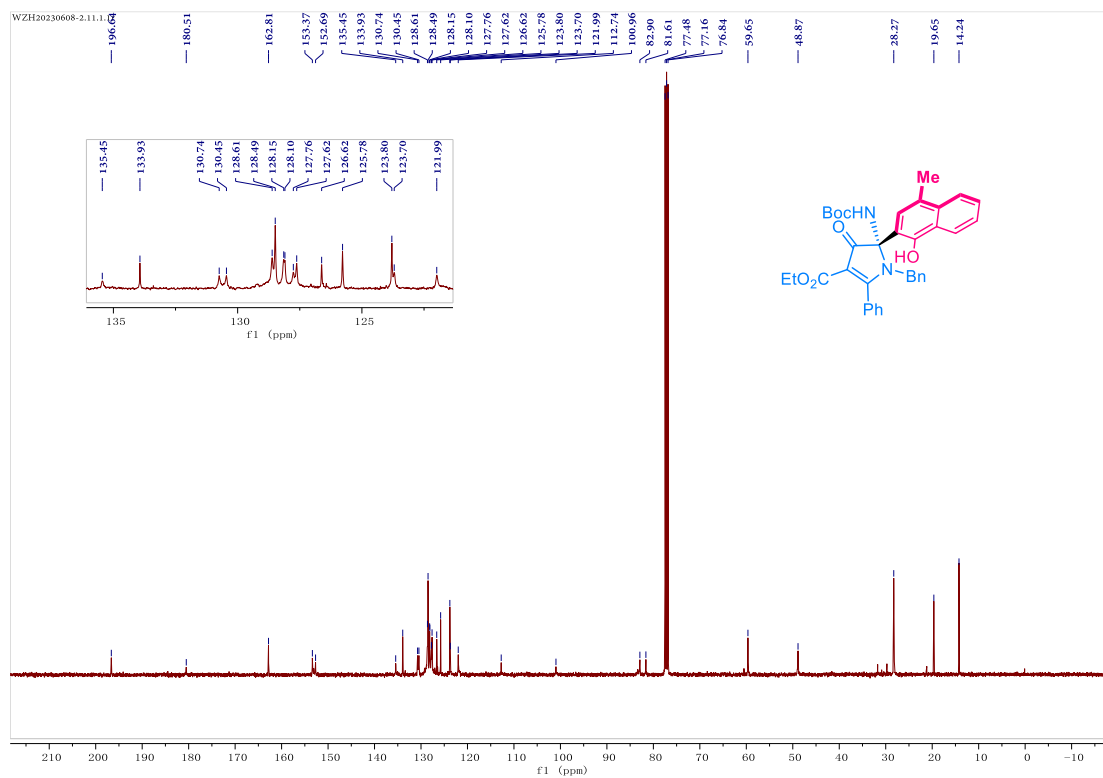



## HPLC spectra of 3ac

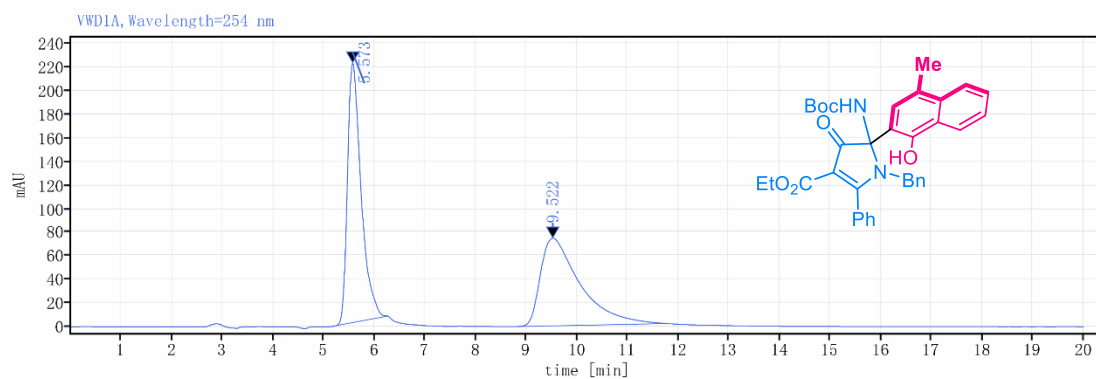

Detector VWD1A, Wavelength=254 nm

| Peak | Ret. Time [min] | Area    | Height | Area%  |
|------|-----------------|---------|--------|--------|
|      | 5.573           | 4110.83 | 220.20 | 50.50  |
|      | 9.522           | 4029.01 | 74.34  | 49.50  |
|      |                 | 8139.85 |        | 100.00 |

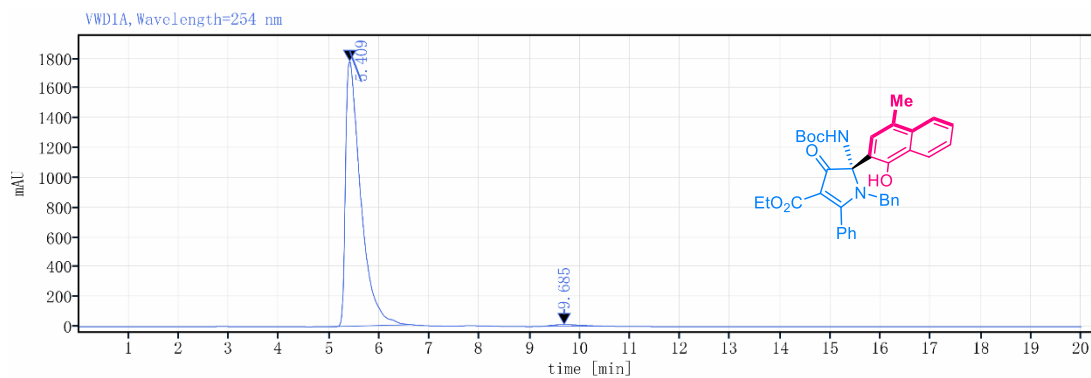

Detector VWD1A, Wavelength=254 nm

| Peak | Ret. Time [min] | Area     | Height  | Area%  |
|------|-----------------|----------|---------|--------|
|      | 5.409           | 37610.51 | 1778.52 | 98.57  |
|      | 9.685           | 546.18   | 12.51   | 1.43   |
|      |                 | 38156.69 |         | 100.00 |

### $^1\text{H}$ NMR (400 MHz, $\text{CDCl}_3$ ) of **3ad**

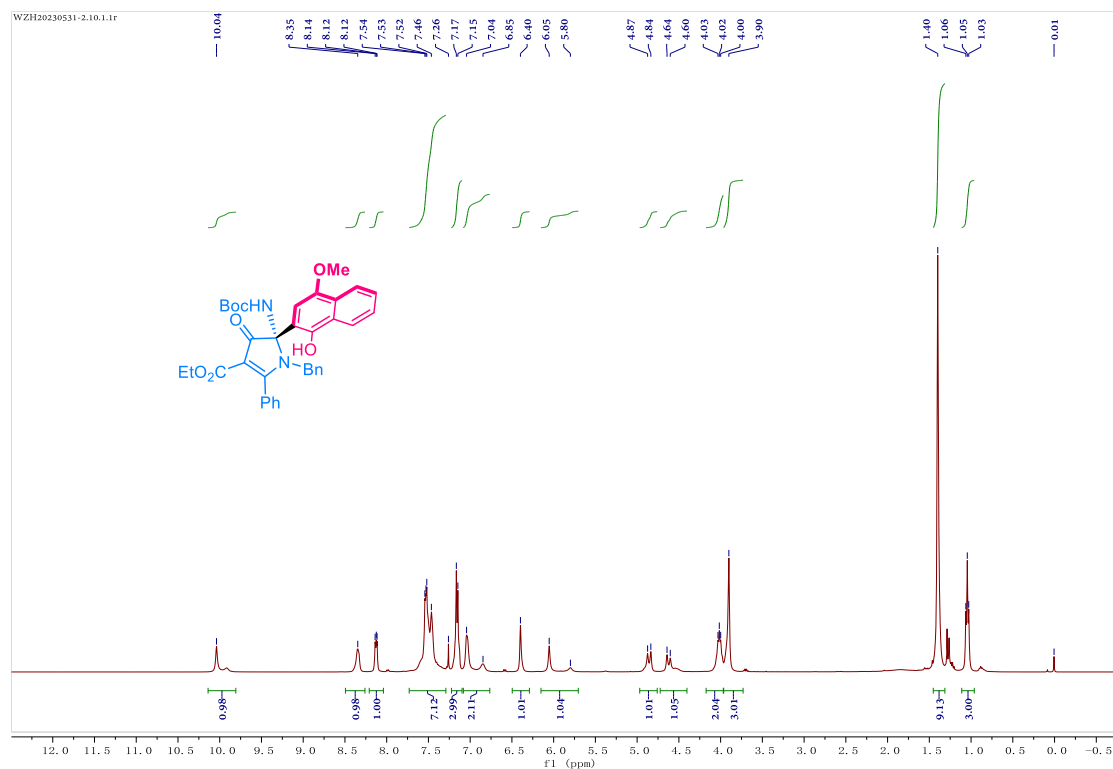

### $^{13}\text{C}$ NMR (101 MHz, $\text{CDCl}_3$ ) of **3ad**

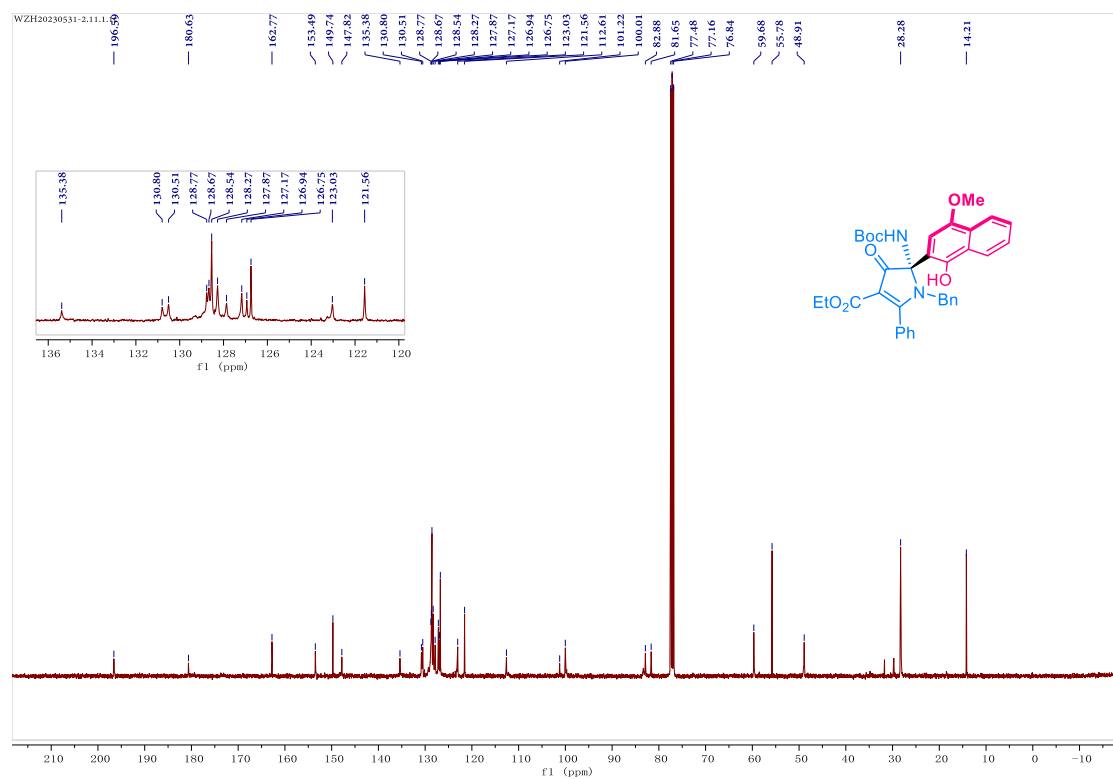

### HPLC spectra of 3ad

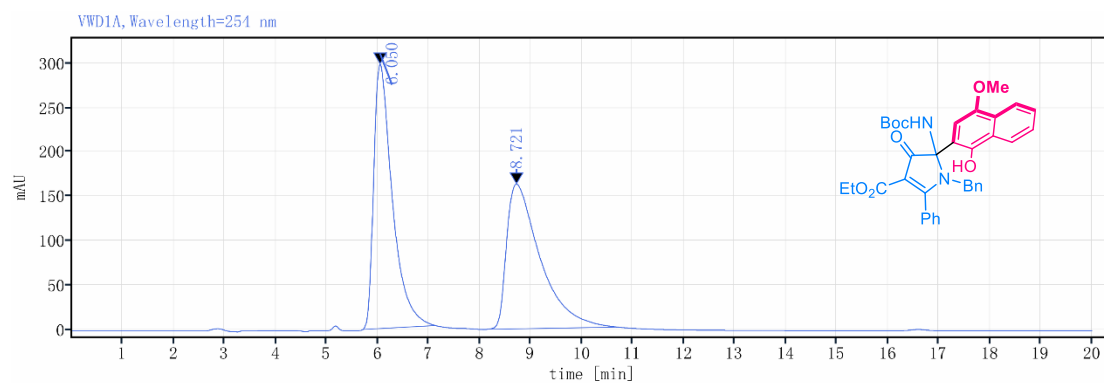

Detector VWD1A, Wavelength=254 nm

| Peak | Ret. Time [min] | Area     | Height | Area%  |
|------|-----------------|----------|--------|--------|
|      | 6.050           | 7526.74  | 296.08 | 50.39  |
|      | 8.721           | 7409.37  | 161.97 | 49.61  |
|      |                 | 14936.11 |        | 100.00 |

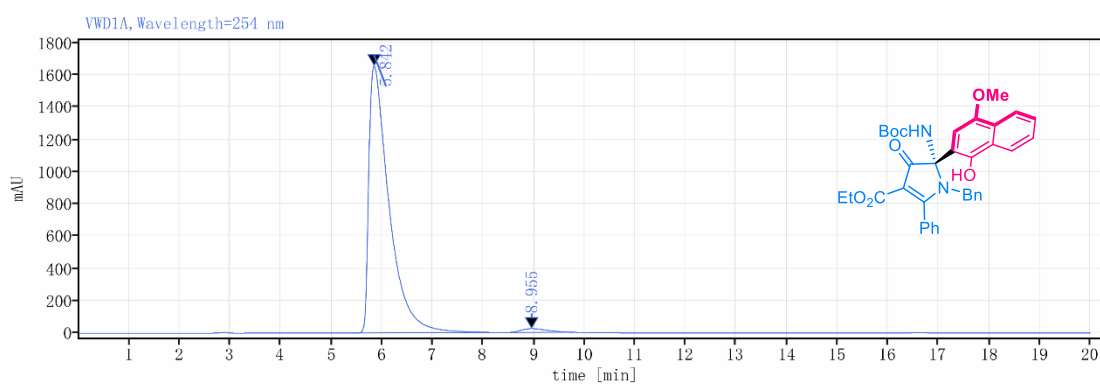

Detector VWD1A, Wavelength=254 nm

| Peak | Ret. Time [min] | Area     | Height  | Area%  |
|------|-----------------|----------|---------|--------|
|      | 5.842           | 46044.29 | 1655.97 | 98.27  |
|      | 8.955           | 812.97   | 22.88   | 1.73   |
|      |                 | 46857.26 |         | 100.00 |

### <sup>1</sup>H NMR (400 MHz, CDCl<sub>3</sub>) of 3ae

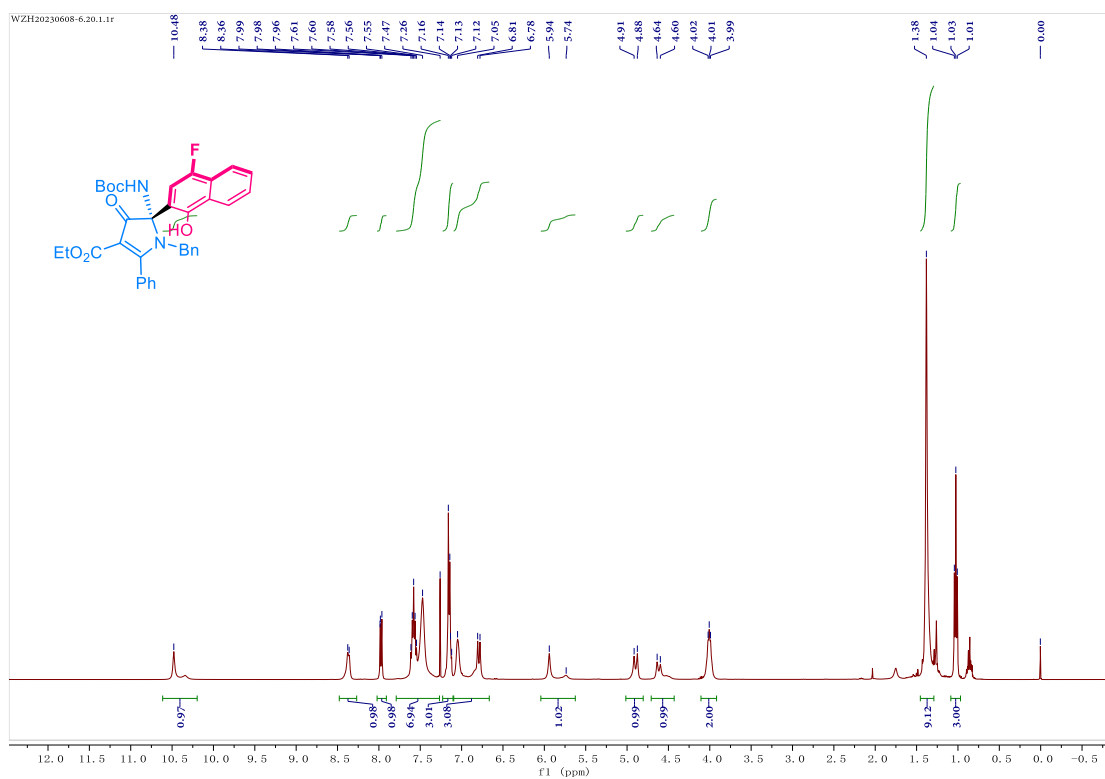

### <sup>13</sup>C NMR (101 MHz, CDCl<sub>3</sub>) of 3ae

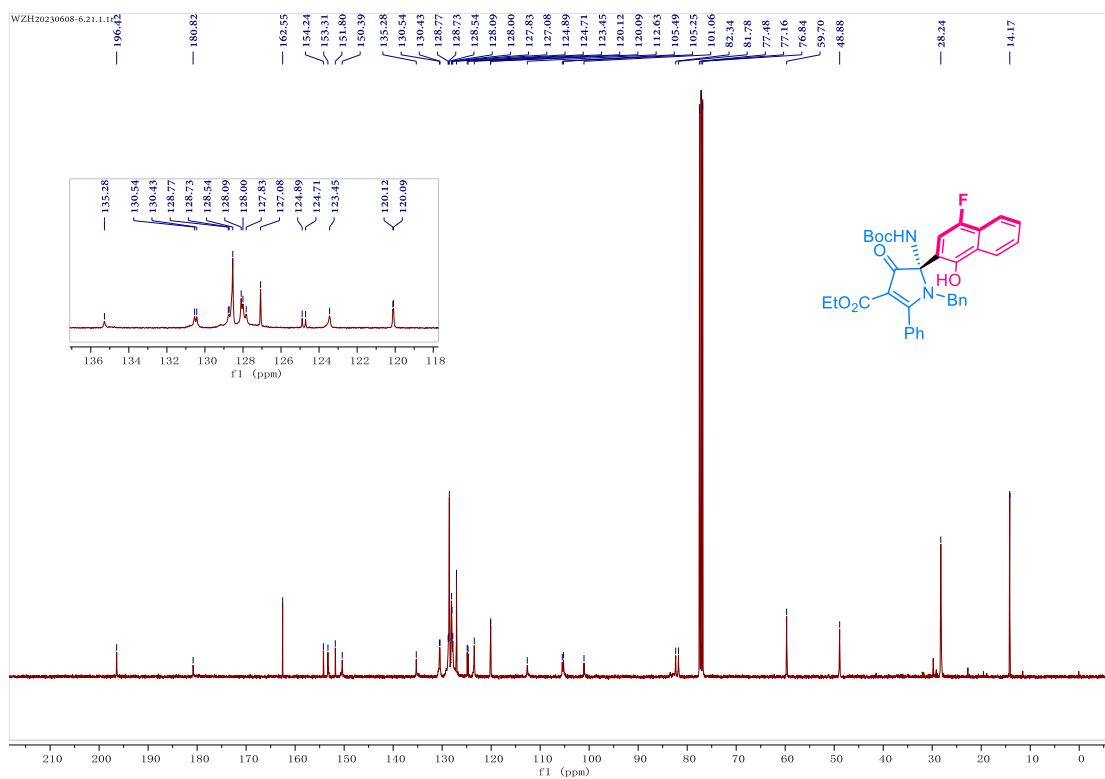

### $^{19}\text{F}$ NMR (377 MHz, $\text{CDCl}_3$ ) of **3ae**

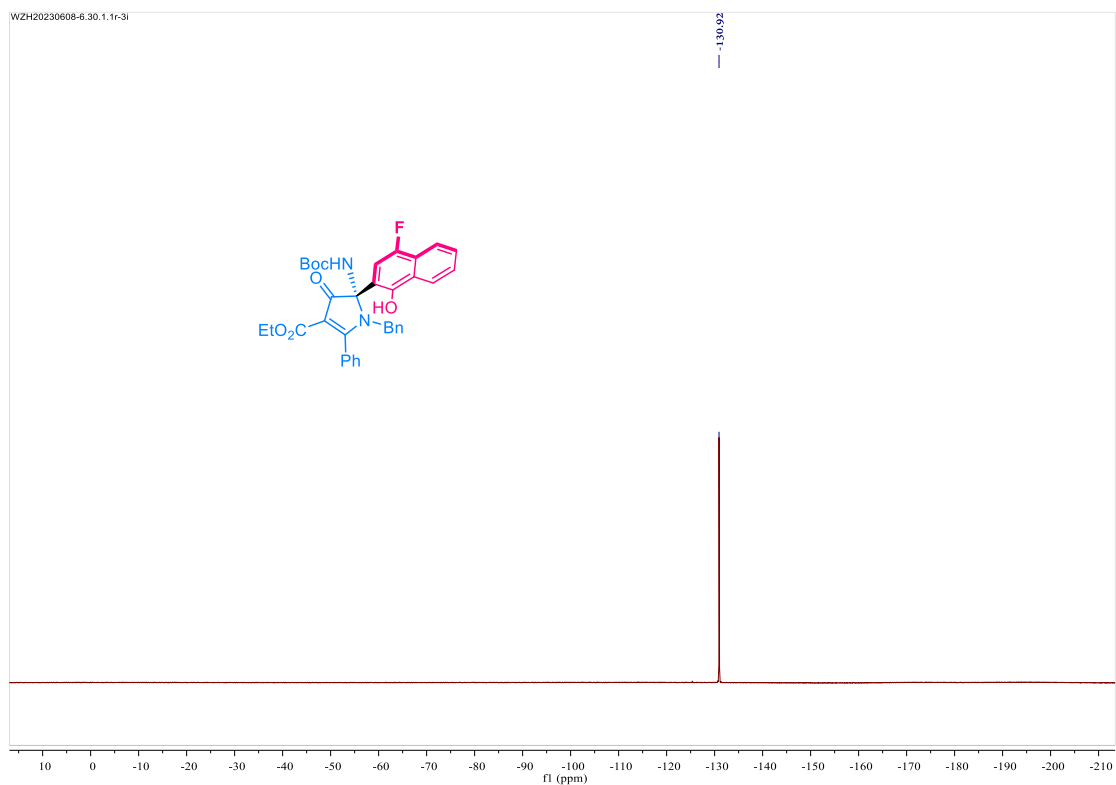

### HPLC spectra of **3ae**

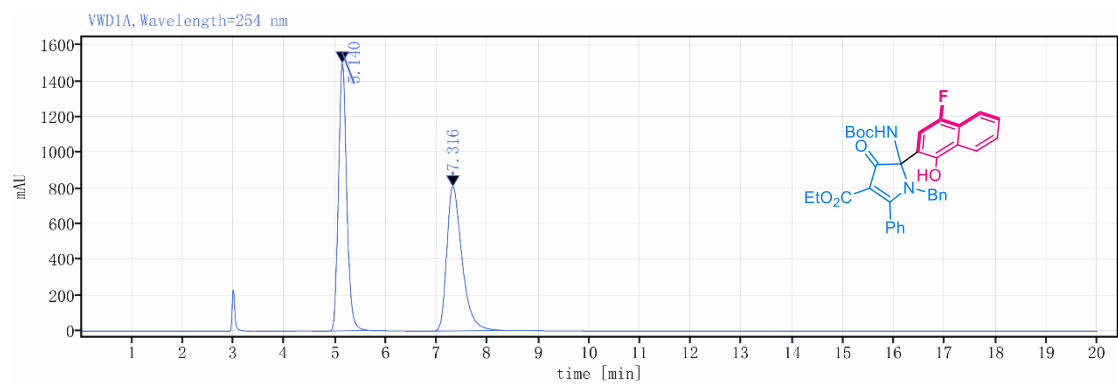

Detector VWD1A, Wavelength=254 nm

| Peak | Ret. Time [min] | Area     | Height  | Area%  |
|------|-----------------|----------|---------|--------|
|      | 5.140           | 16927.70 | 1499.32 | 50.25  |
|      | 7.316           | 16761.96 | 806.76  | 49.75  |
|      |                 | 33689.66 |         | 100.00 |

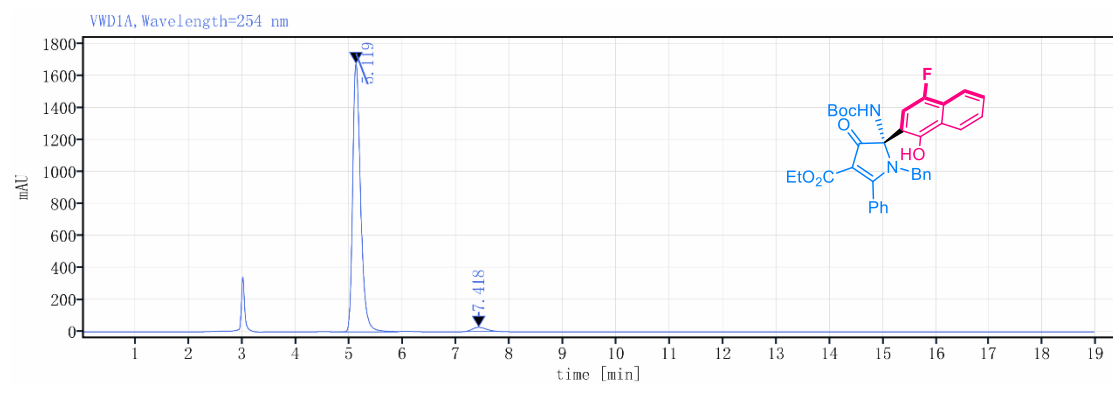

Detector VWD1A, Wavelength=254 nm

| Peak | Ret. Time [min] | Area     | Height  | Area%  |
|------|-----------------|----------|---------|--------|
|      | 5.119           | 17258.25 | 1673.25 | 97.26  |
|      | 7.418           | 486.70   | 26.47   | 2.74   |
|      |                 | 17744.95 |         | 100.00 |

<sup>1</sup>H NMR (400 MHz, CDCl<sub>3</sub>) of **3af**

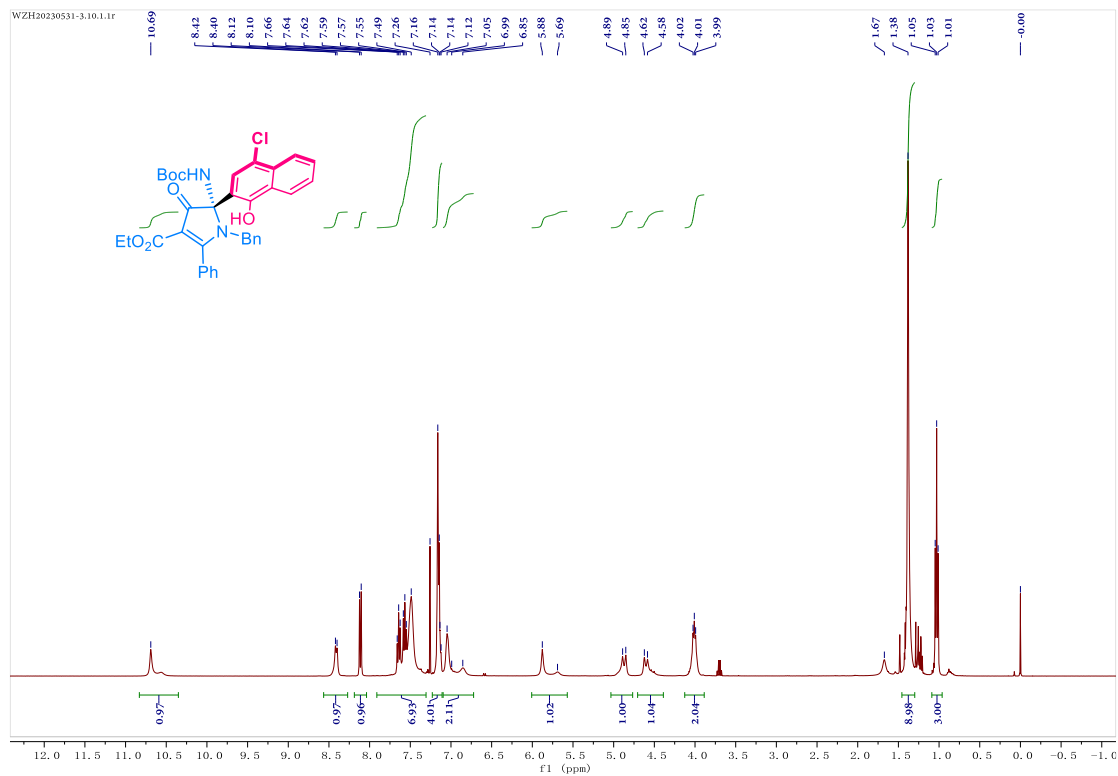

<sup>13</sup>C NMR (101 MHz, CDCl<sub>3</sub>) of **3af**

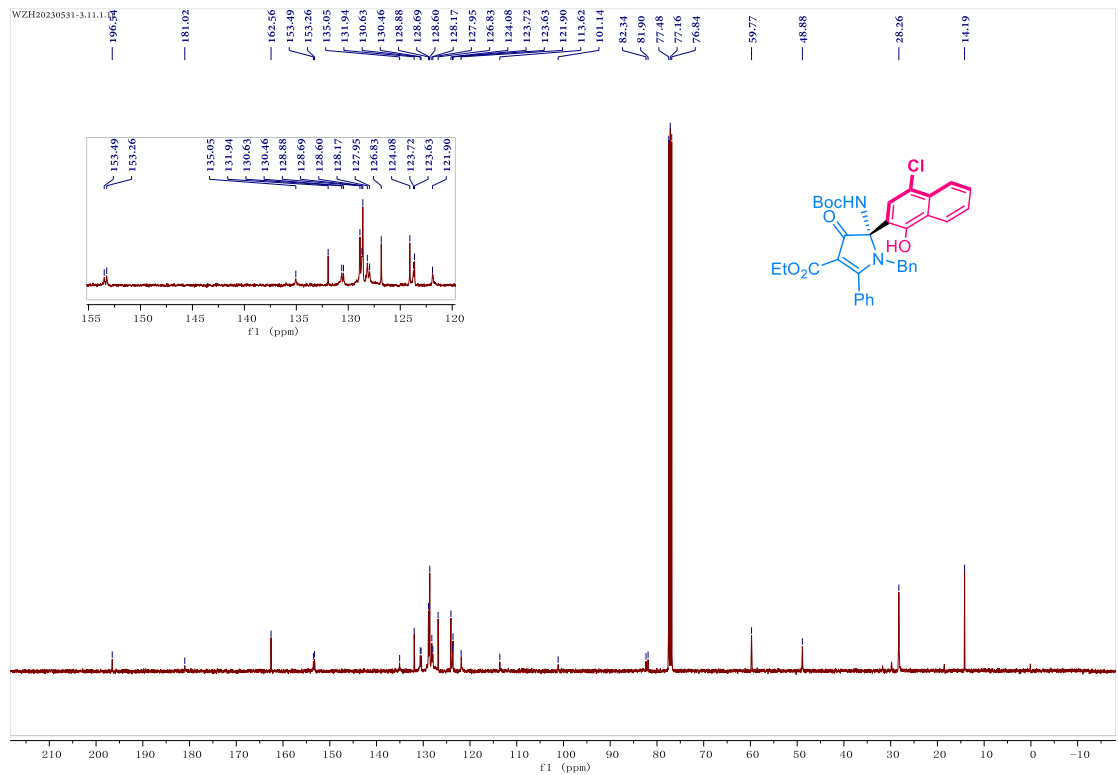

## HPLC spectra of 3af

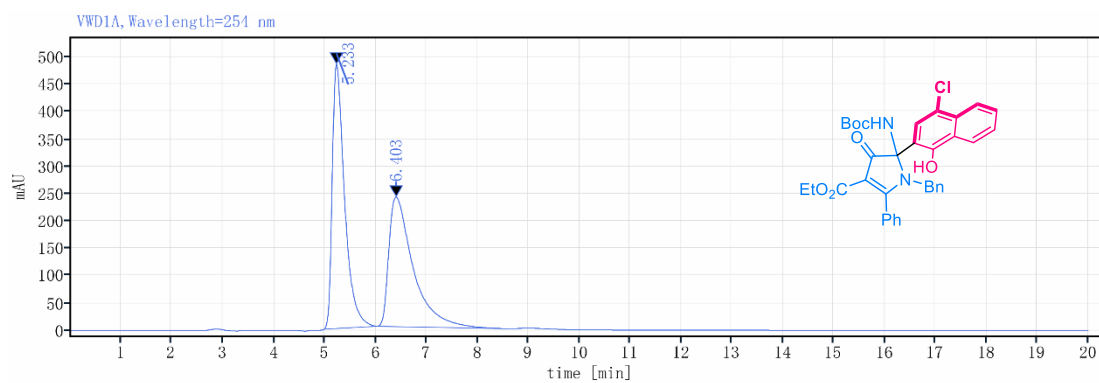

Detector VWD1A, Wavelength=254 nm

| Peak | Ret. Time [min] | Area     | Height | Area%  |
|------|-----------------|----------|--------|--------|
|      | 5.233           | 8144.16  | 484.10 | 50.81  |
|      | 6.403           | 7884.76  | 237.45 | 49.19  |
|      |                 | 16028.92 |        | 100.00 |

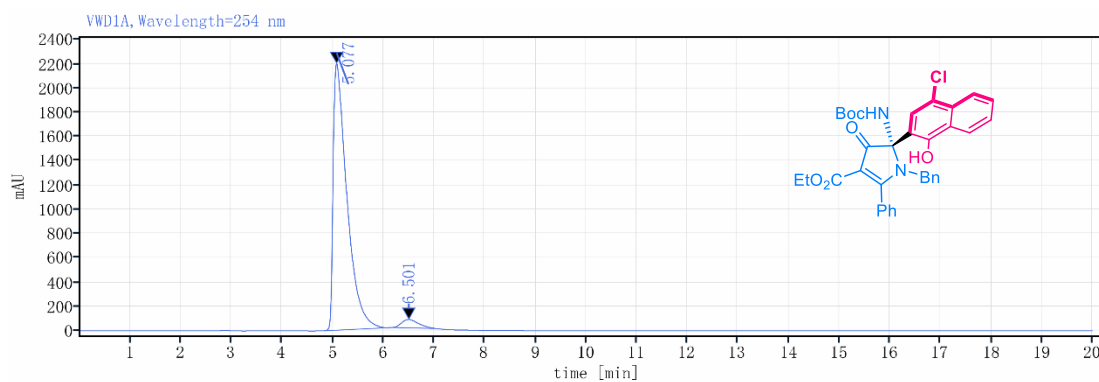

Detector VWD1A, Wavelength=254 nm

| Peak | Ret. Time [min] | Area     | Height  | Area%  |
|------|-----------------|----------|---------|--------|
|      | 5.077           | 41423.25 | 2198.07 | 96.30  |
|      | 6.501           | 1591.74  | 68.93   | 3.70   |
|      |                 | 43014.98 |         | 100.00 |



### <sup>1</sup>H NMR (400 MHz, CDCl<sub>3</sub>) of **3ag**

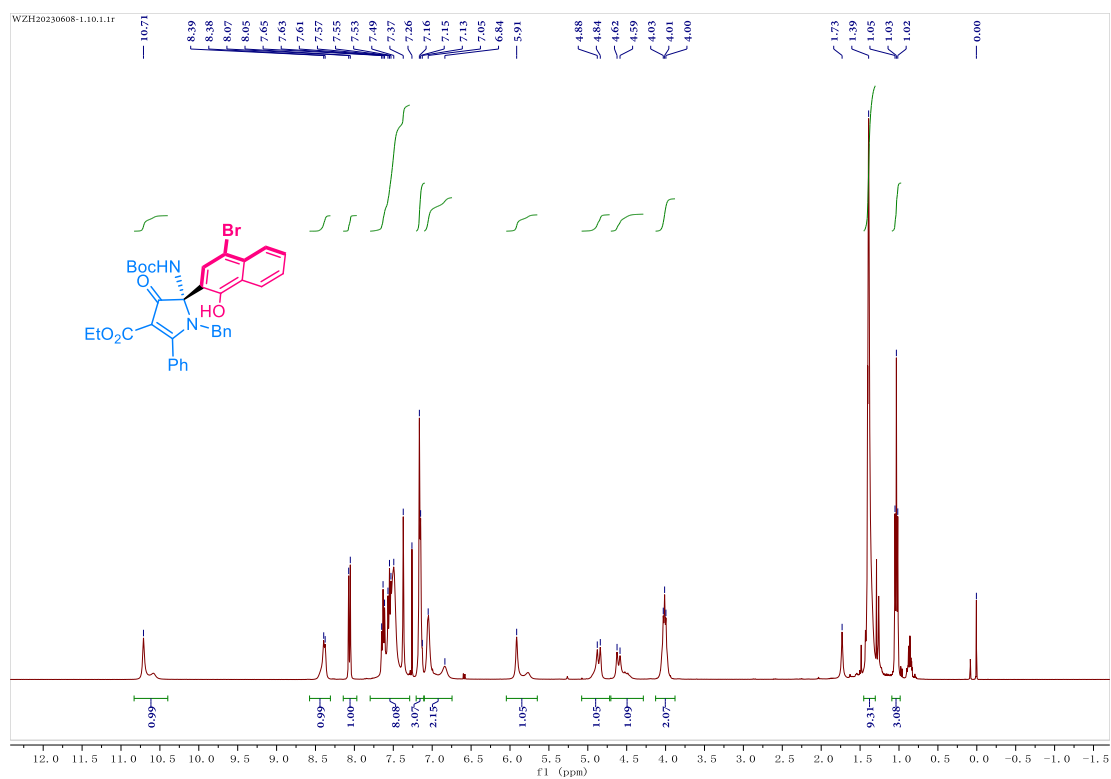

### <sup>13</sup>C NMR (101 MHz, CDCl<sub>3</sub>) of **3ag**

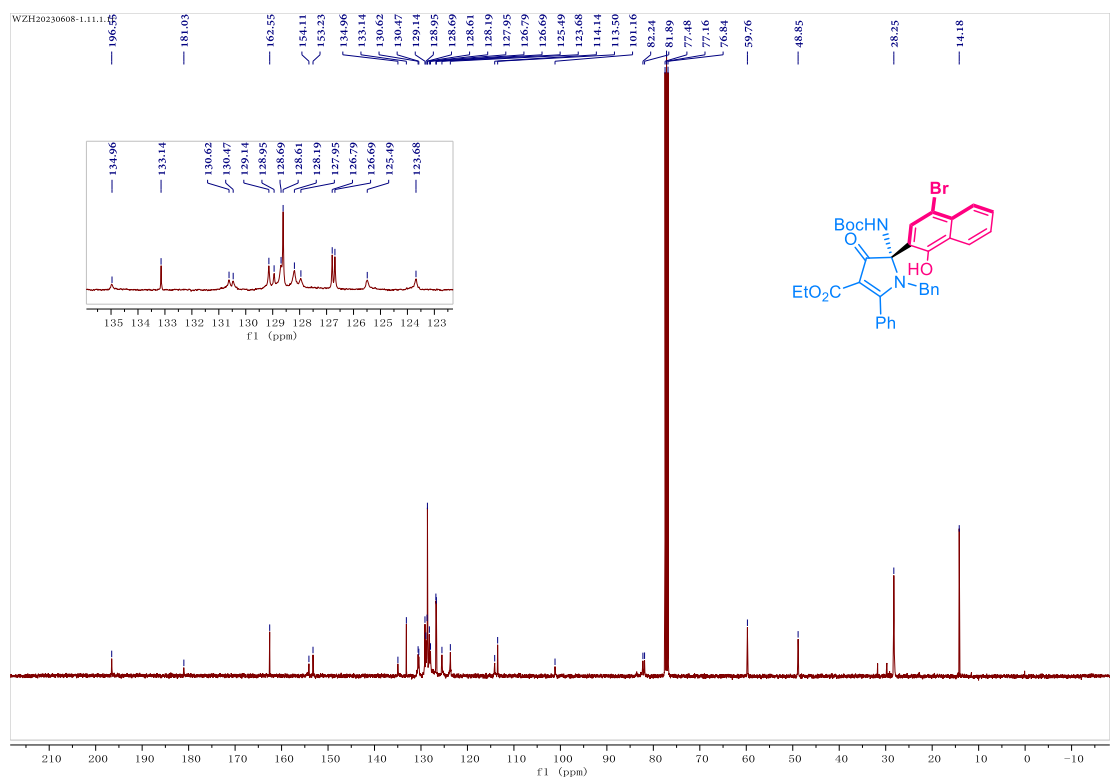

## HPLC spectra of 3ag

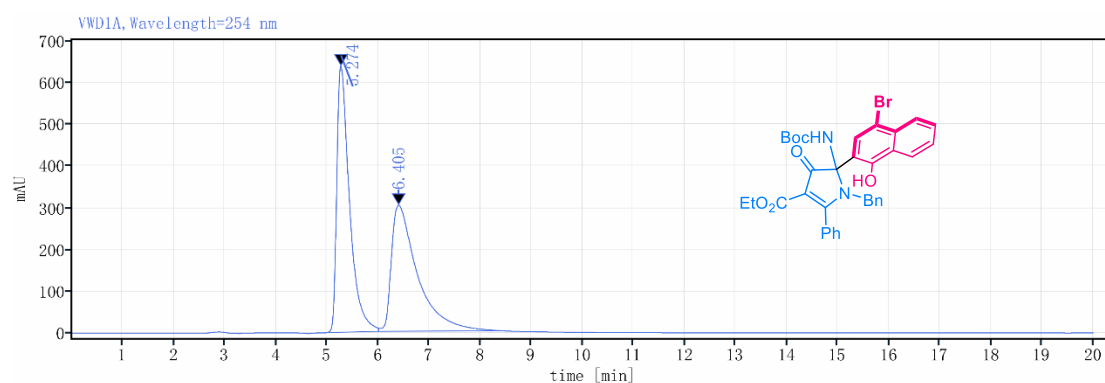

Detector VWD1A, Wavelength=254 nm

| Peak | Ret.Time [min] | Area     | Height | Area%  |
|------|----------------|----------|--------|--------|
|      | 5.274          | 11081.80 | 640.78 | 50.77  |
|      | 6.405          | 10744.14 | 303.37 | 49.23  |
|      |                | 21825.94 |        | 100.00 |

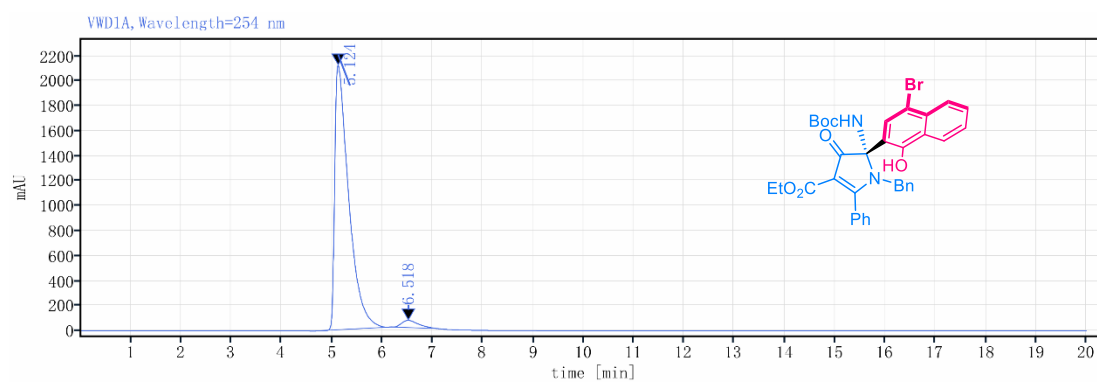

Detector VWD1A, Wavelength=254 nm

| Peak | Ret.Time [min] | Area     | Height  | Area%  |
|------|----------------|----------|---------|--------|
|      | 5.124          | 40886.46 | 2119.65 | 96.83  |
|      | 6.518          | 1338.61  | 58.33   | 3.17   |
|      |                | 42225.08 |         | 100.00 |

### <sup>1</sup>H NMR (400 MHz, CDCl<sub>3</sub>) of **3ah**

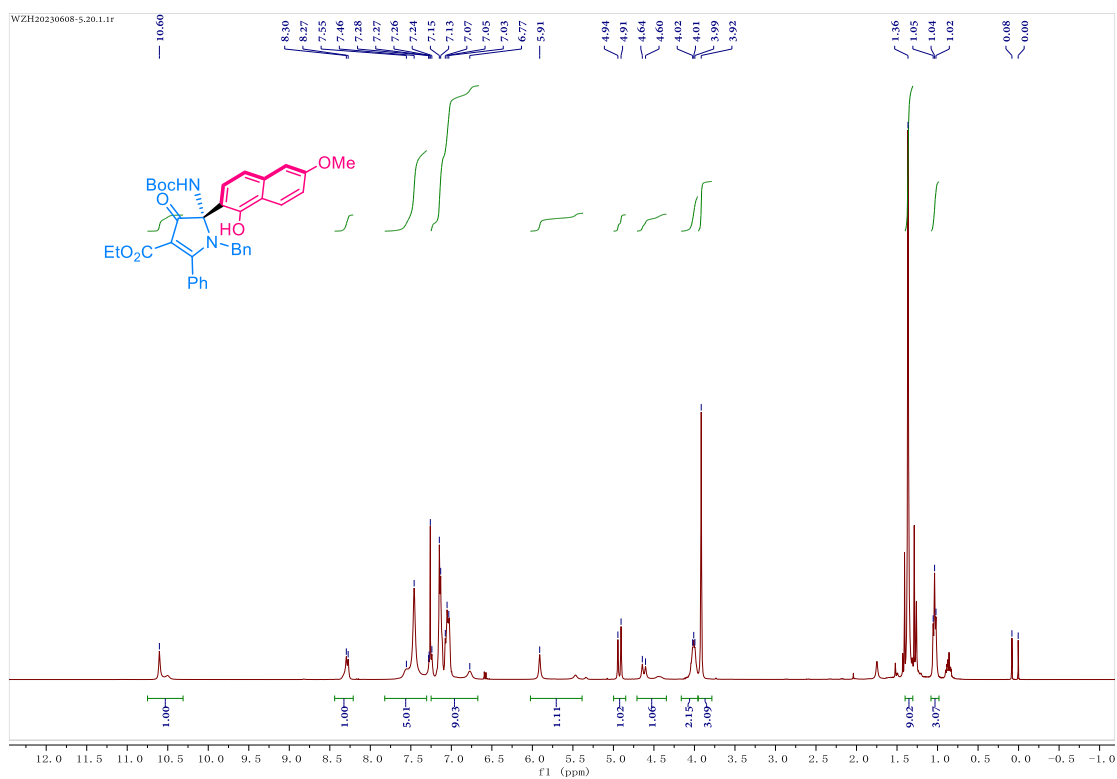

### <sup>13</sup>C NMR (101 MHz, CDCl<sub>3</sub>) of **3ah**

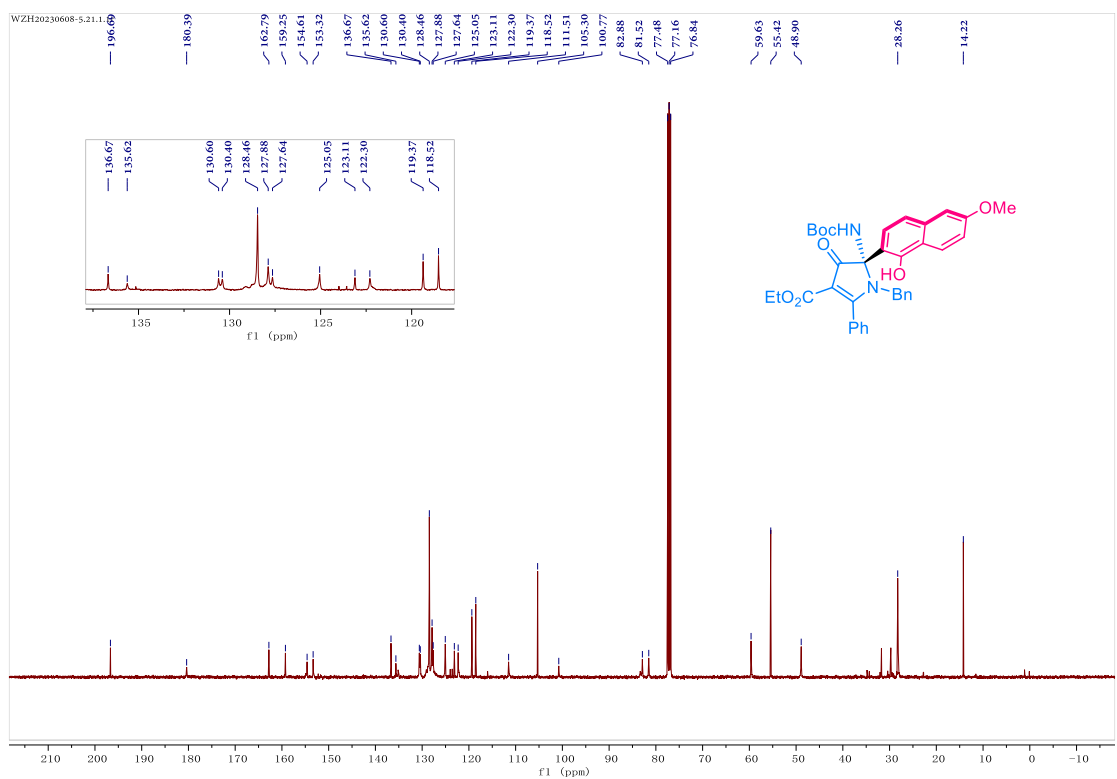

### HPLC spectra of 3ah

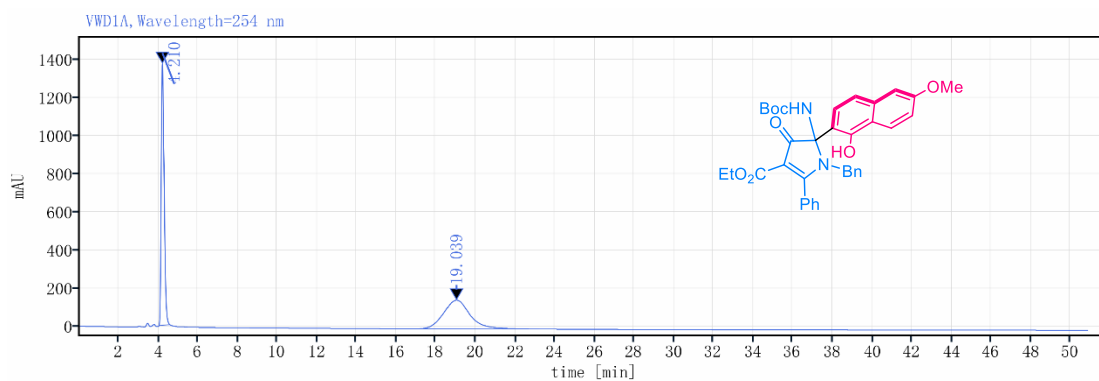

Detector VWD1A, Wavelength=254 nm

| Peak | Ret.Time [min] | Area     | Height  | Area%  |
|------|----------------|----------|---------|--------|
|      | 4.210          | 14023.86 | 1376.05 | 50.07  |
|      | 19.039         | 13983.85 | 150.68  | 49.93  |
|      |                | 28007.72 |         | 100.00 |

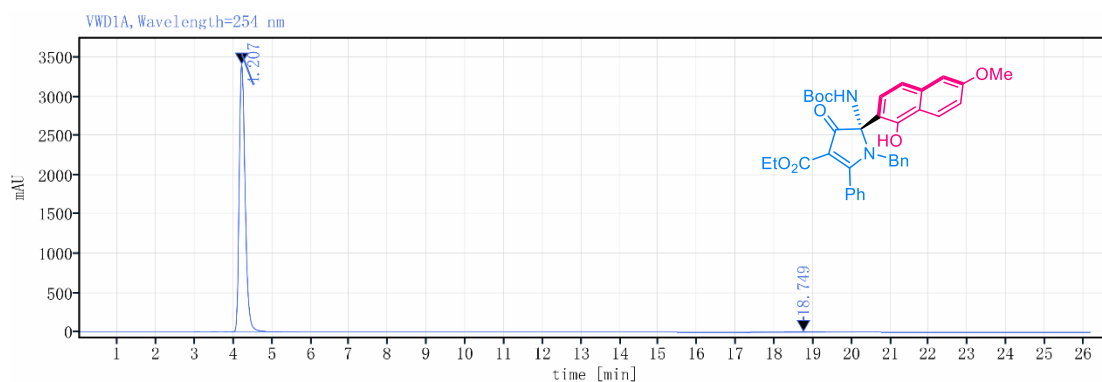

Detector VWD1A, Wavelength=254 nm

| Peak | Ret.Time [min] | Area     | Height  | Area%  |
|------|----------------|----------|---------|--------|
|      | 4.207          | 36766.47 | 3418.14 | 98.77  |
|      | 18.749         | 459.29   | 5.12    | 1.23   |
|      |                | 37225.77 |         | 100.00 |

<sup>1</sup>H NMR (400 MHz, CDCl<sub>3</sub>) of **3ai**

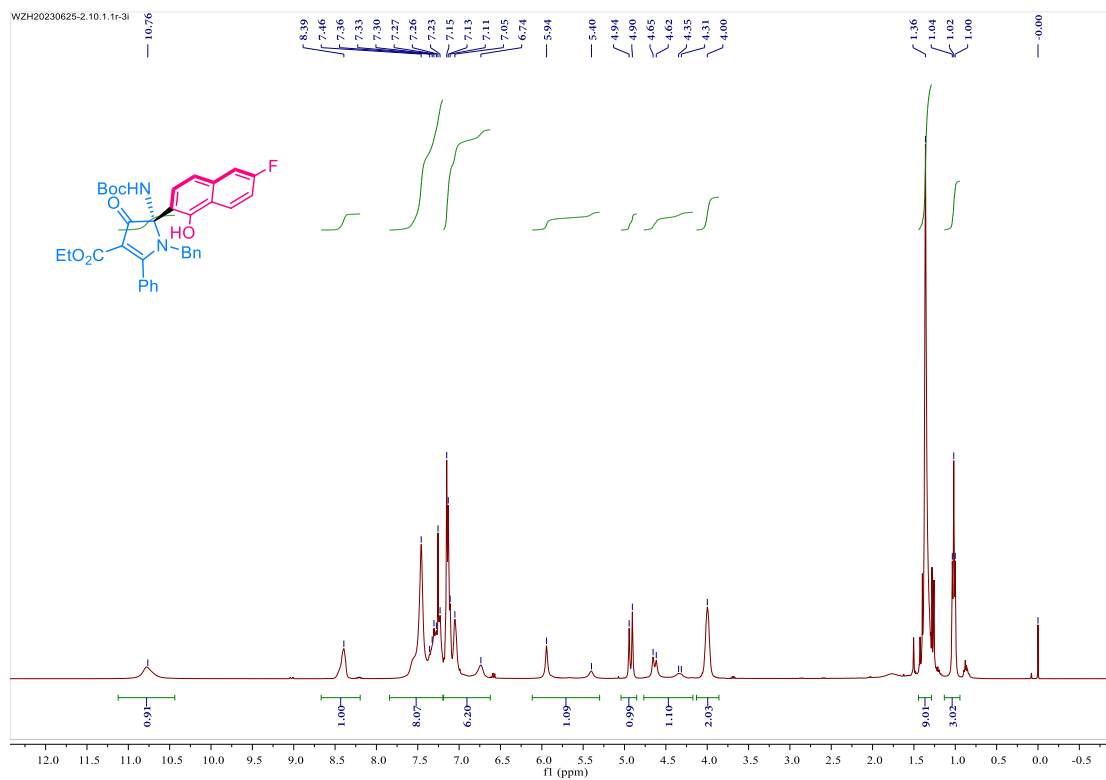

<sup>13</sup>C NMR (101 MHz, CDCl<sub>3</sub>) of **3ai**

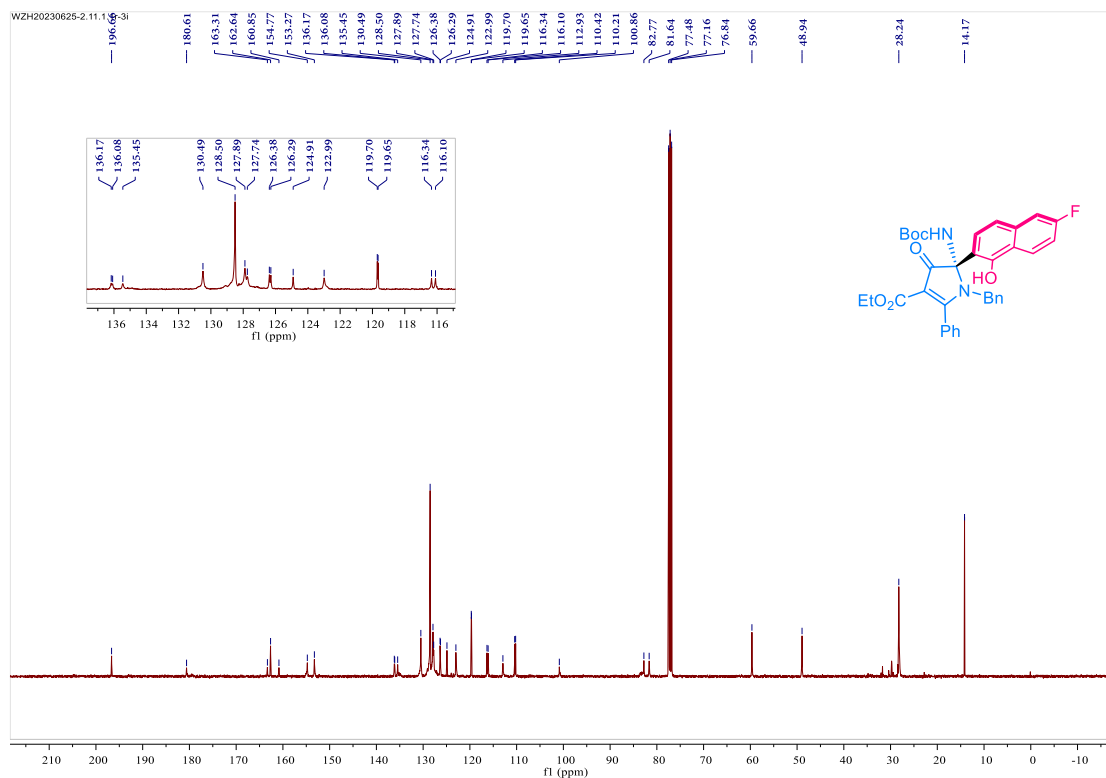

### $^{19}\text{F}$ NMR (377 MHz, $\text{CDCl}_3$ ) of **3ai**

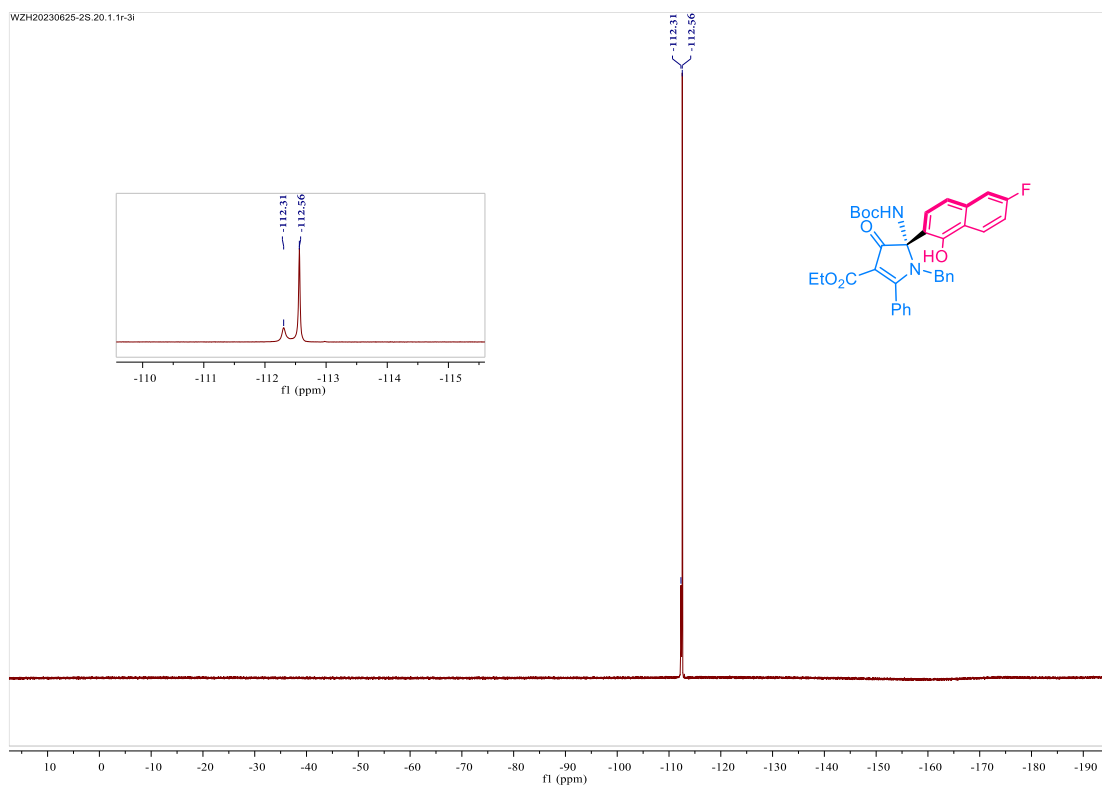

### HPLC spectra of **3ai**

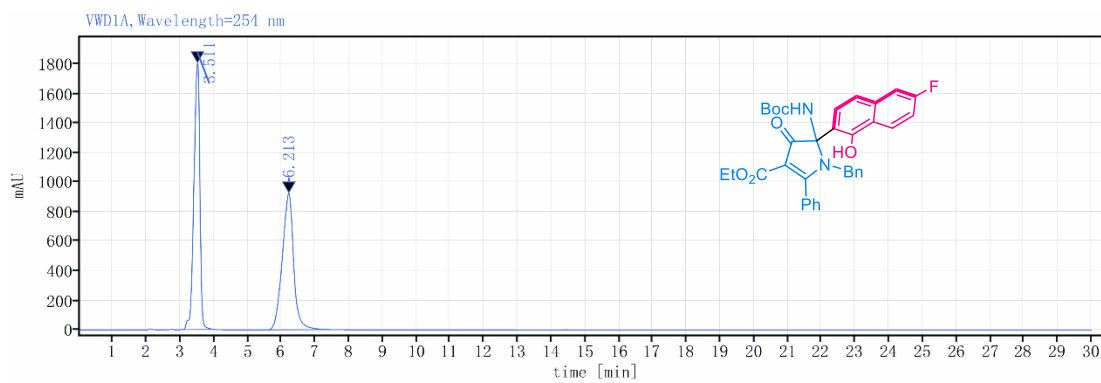

Detector VWD1A, Wavelength=254 nm

| Peak | Ret.Time [min] | Area     | Height  | Area%  |
|------|----------------|----------|---------|--------|
|      | 3.511          | 22308.98 | 1804.44 | 50.85  |
|      | 6.213          | 21565.70 | 925.02  | 49.15  |
|      |                | 43874.69 |         | 100.00 |

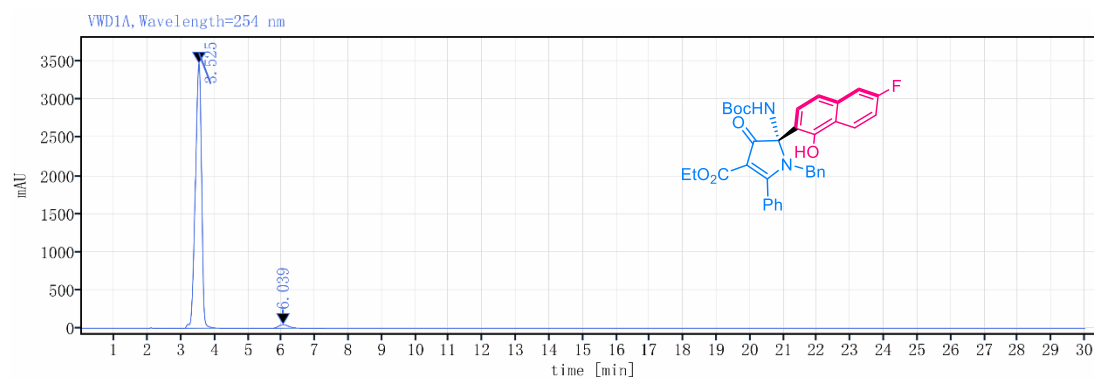

Detector VWD1A, Wavelength=254 nm

| Peak | Ret. Time [min] | Area     | Height  | Area%  |
|------|-----------------|----------|---------|--------|
|      | 3.525           | 44708.17 | 3472.03 | 97.85  |
|      | 6.039           | 983.84   | 47.49   | 2.15   |
|      |                 | 45692.01 |         | 100.00 |

### <sup>1</sup>H NMR (400 MHz, CDCl<sub>3</sub>) of 3aj

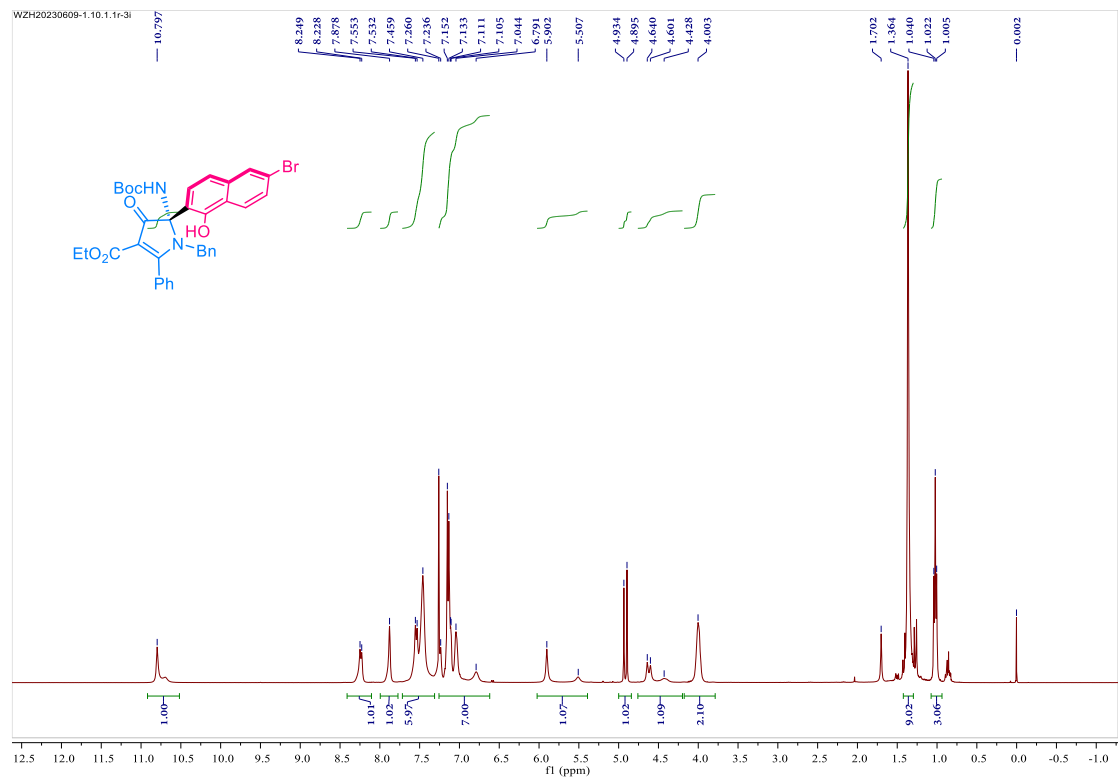

### <sup>13</sup>C NMR (101 MHz, CDCl<sub>3</sub>) of 3aj

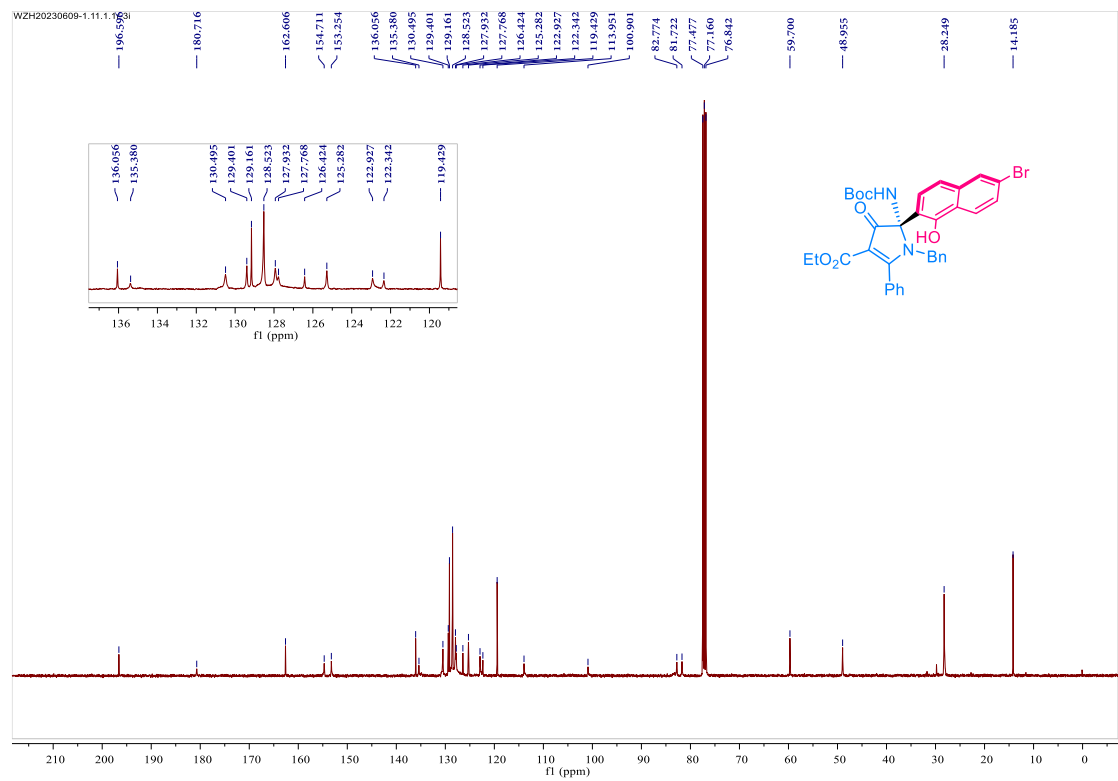



## HPLC spectra of 3aj

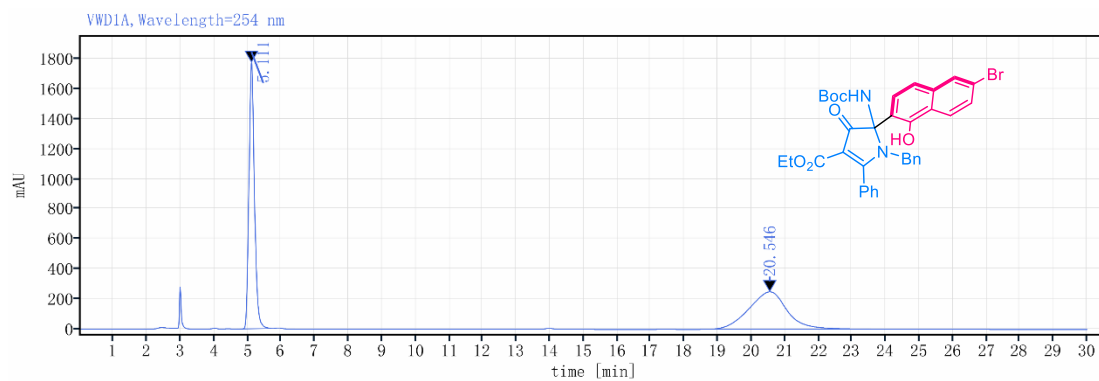

Detector VWD1A, Wavelength=254 nm

| Peak | Ret.Time [min] | Area     | Height  | Area%  |
|------|----------------|----------|---------|--------|
|      | 5.111          | 20216.36 | 1772.52 | 50.41  |
|      | 20.546         | 19890.87 | 249.28  | 49.59  |
|      |                | 40107.23 |         | 100.00 |

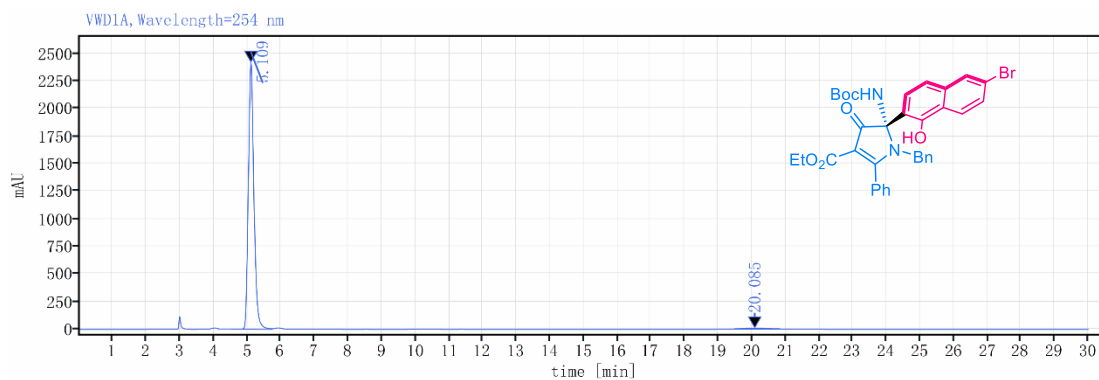

Detector VWD1A, Wavelength=254 nm

| Peak | Ret.Time [min] | Area     | Height  | Area%  |
|------|----------------|----------|---------|--------|
|      | 5.109          | 27671.52 | 2417.97 | 97.80  |
|      | 20.085         | 621.03   | 9.43    | 2.20   |
|      |                | 28292.55 |         | 100.00 |

### <sup>1</sup>H NMR (400 MHz, CDCl<sub>3</sub>) of **3ak**

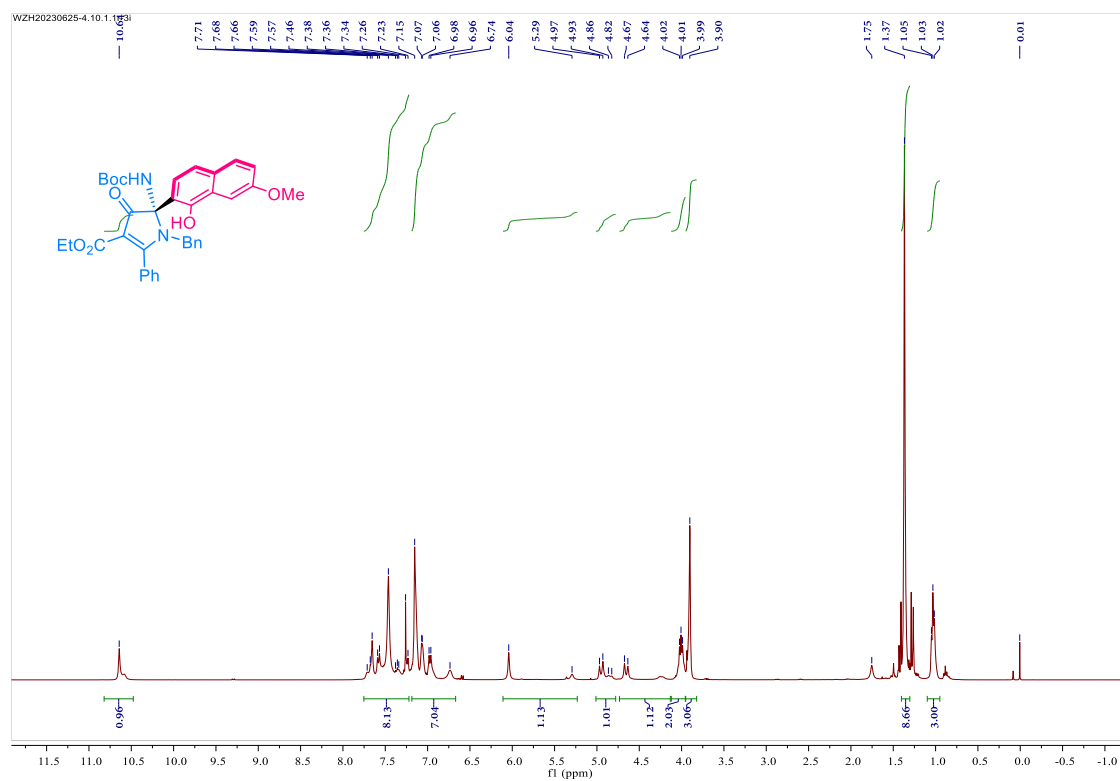

### <sup>13</sup>C NMR (101 MHz, CDCl<sub>3</sub>) of **3ak**

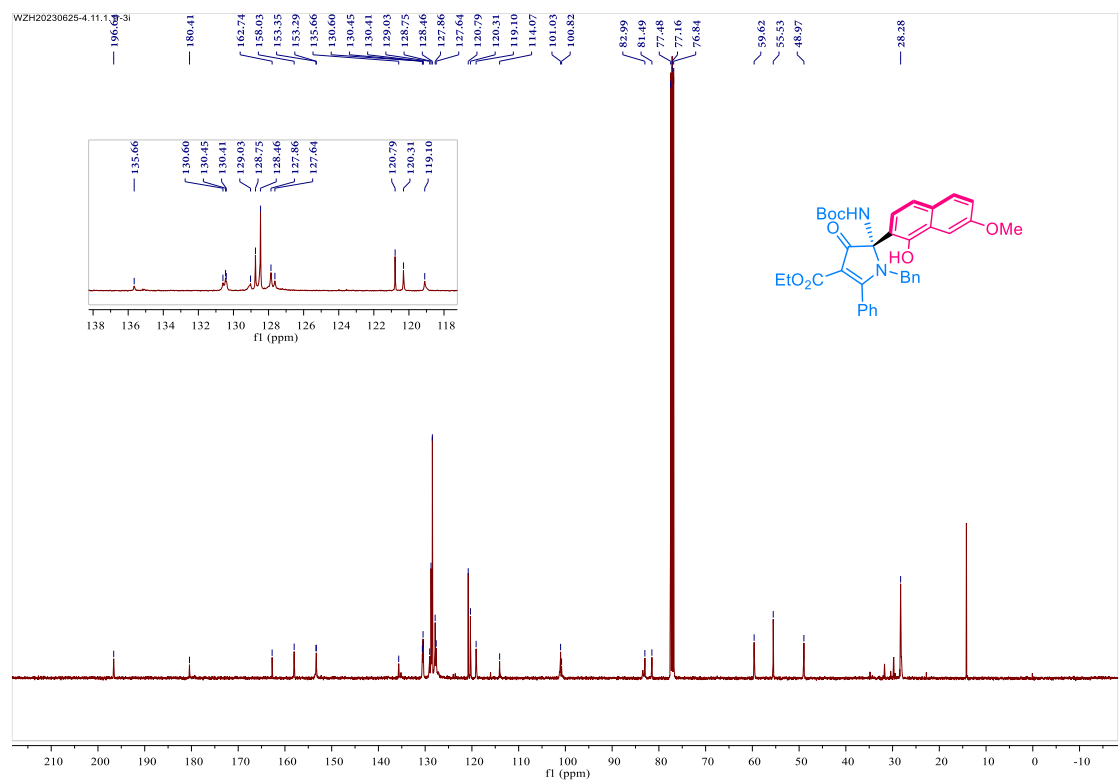

## HPLC spectra of 3ak

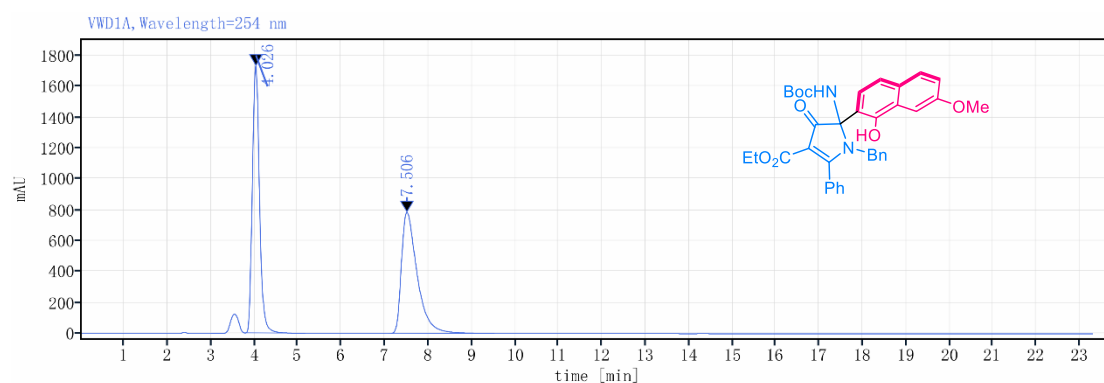

Detector VWD1A, Wavelength=254 nm

| Peak | Ret. Time [min] | Area     | Height  | Area%  |
|------|-----------------|----------|---------|--------|
|      | 4.026           | 19767.69 | 1730.05 | 50.08  |
|      | 7.506           | 19705.24 | 784.78  | 49.92  |
|      |                 | 39472.92 |         | 100.00 |

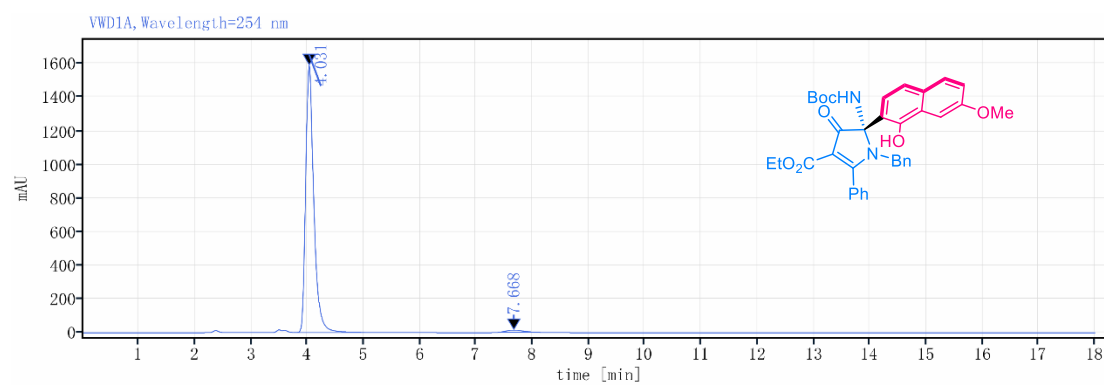

Detector VWD1A, Wavelength=254 nm

| Peak | Ret. Time [min] | Area     | Height  | Area%  |
|------|-----------------|----------|---------|--------|
|      | 4.031           | 16008.26 | 1590.35 | 98.48  |
|      | 7.668           | 246.33   | 12.48   | 1.52   |
|      |                 | 16254.59 |         | 100.00 |

### <sup>1</sup>H NMR (400 MHz, CDCl<sub>3</sub>) of **3al**

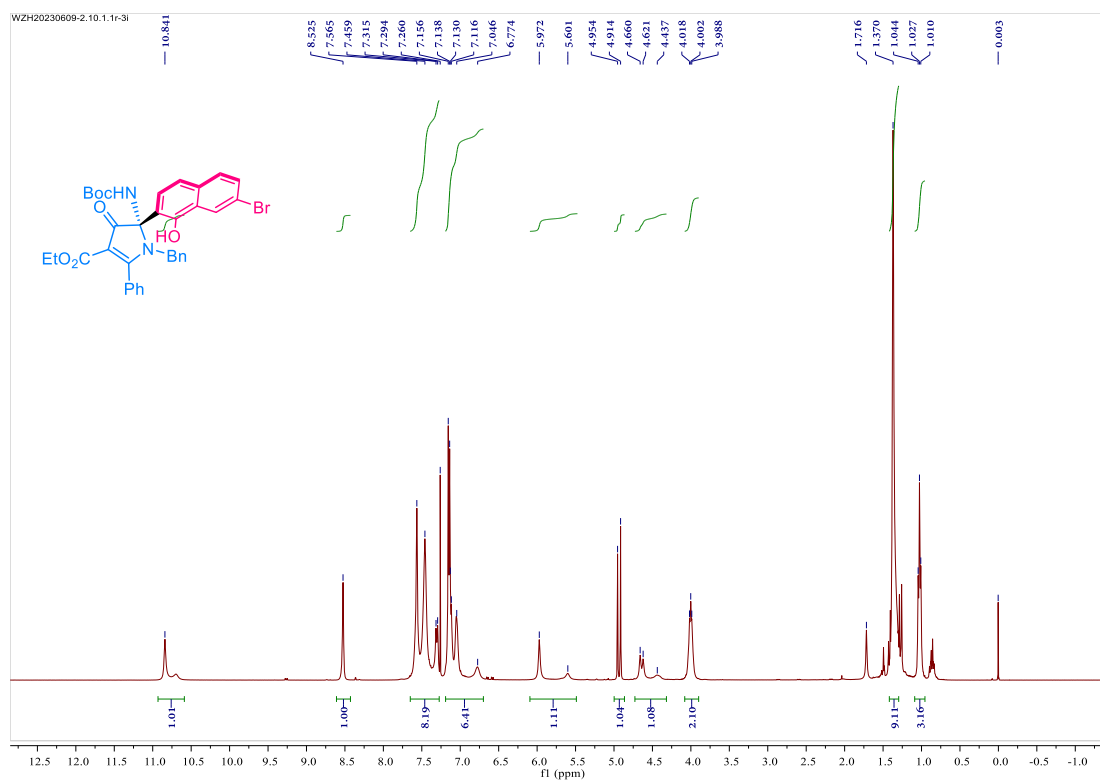

### <sup>13</sup>C NMR (101 MHz, CDCl<sub>3</sub>) of **3al**

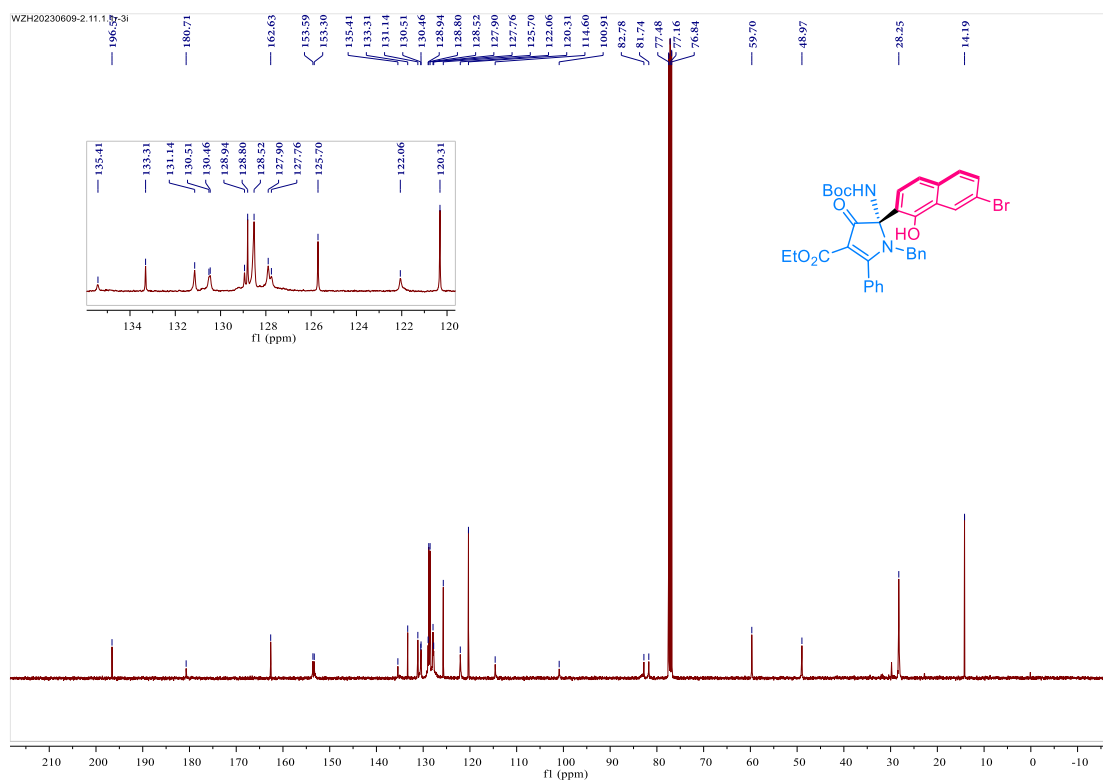

### HPLC spectra of 3a1

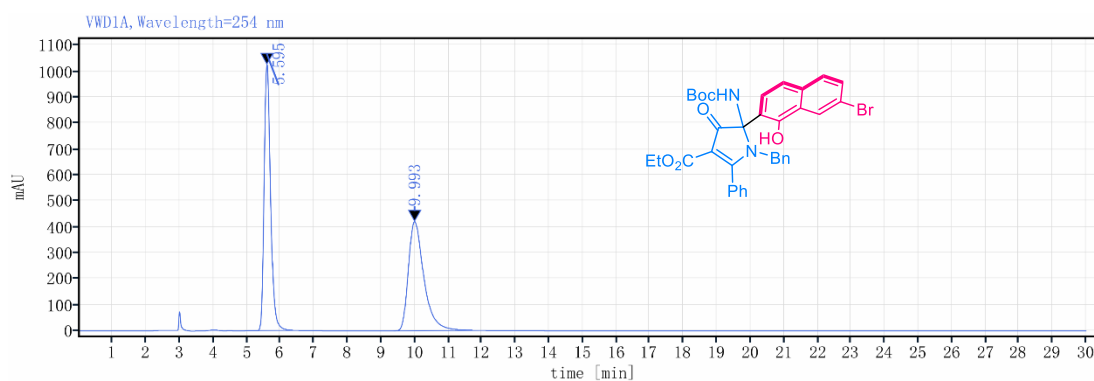

Detector VWD1A, Wavelength=254 nm

| Peak | Ret.Time [min] | Area     | Height  | Area%  |
|------|----------------|----------|---------|--------|
|      | 5.595          | 13634.18 | 1026.47 | 50.11  |
|      | 9.993          | 13572.04 | 421.15  | 49.89  |
|      |                | 27206.21 |         | 100.00 |

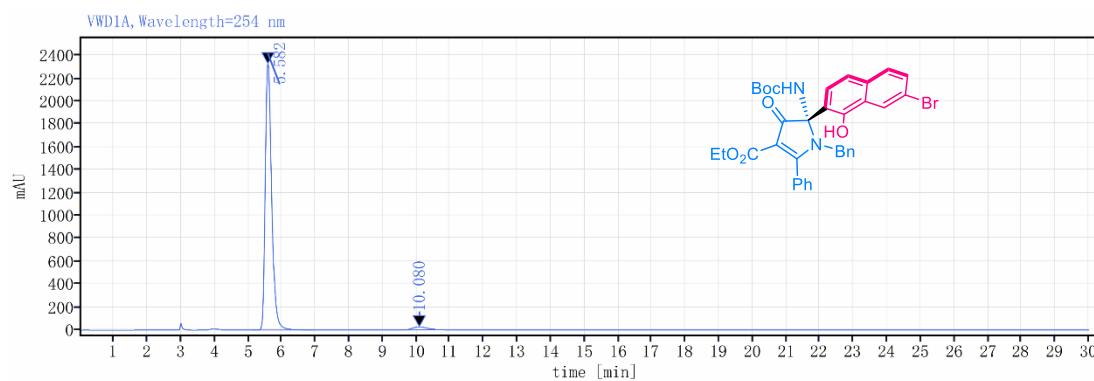

Detector VWD1A, Wavelength=254 nm

| Peak | Ret.Time [min] | Area     | Height  | Area%  |
|------|----------------|----------|---------|--------|
|      | 5.582          | 30832.68 | 2327.54 | 97.39  |
|      | 10.080         | 827.34   | 26.86   | 2.61   |
|      |                | 31660.03 |         | 100.00 |

### $^1\text{H}$ NMR (400 MHz, $\text{CDCl}_3$ ) of **3am**

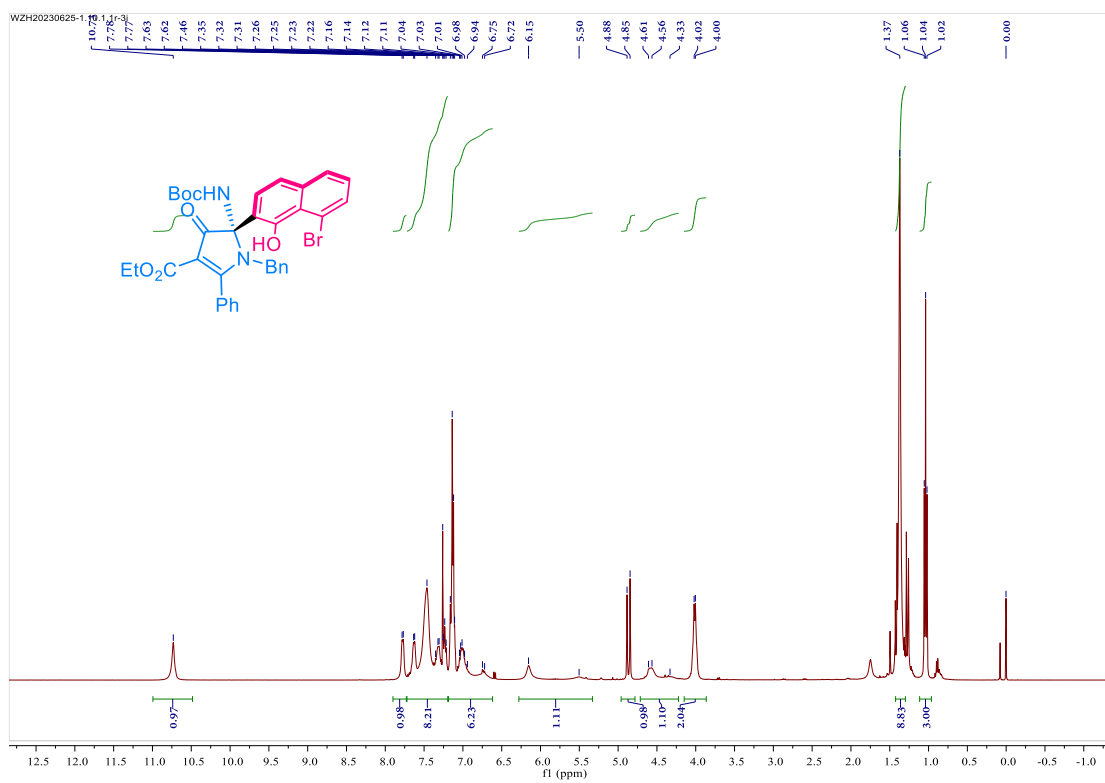

### $^{13}\text{C}$ NMR (101 MHz, $\text{CDCl}_3$ ) of **3am**

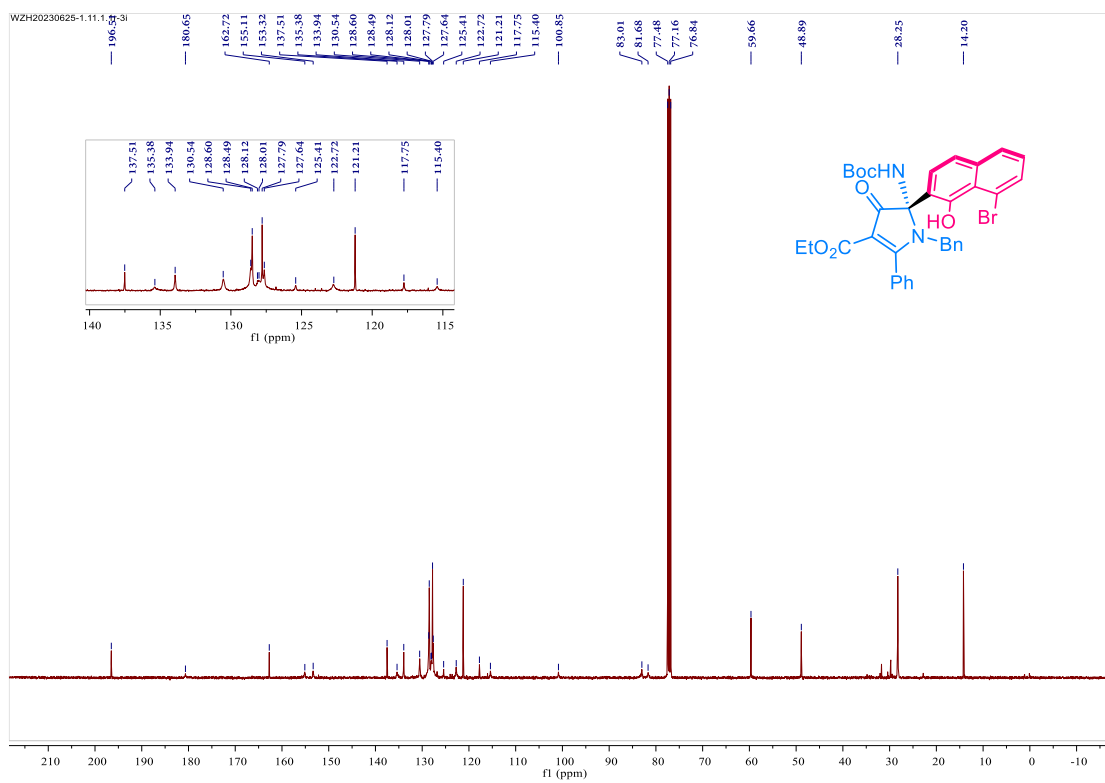

## HPLC spectra of **3am**

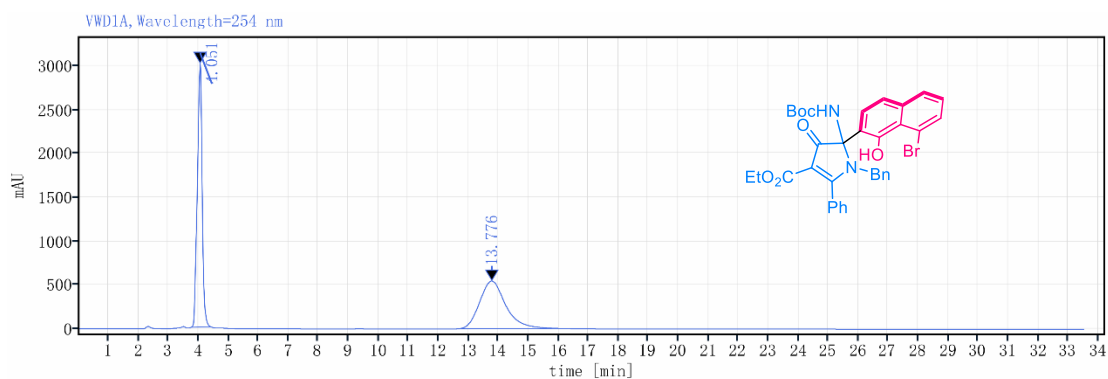

Detector VWD1A, Wavelength=254 nm

| Peak | Ret.Time [min] | Area     | Height  | Area%  |
|------|----------------|----------|---------|--------|
|      | 4.051          | 33611.82 | 3015.48 | 50.42  |
|      | 13.776         | 33058.31 | 544.89  | 49.58  |
|      |                | 66670.13 |         | 100.00 |

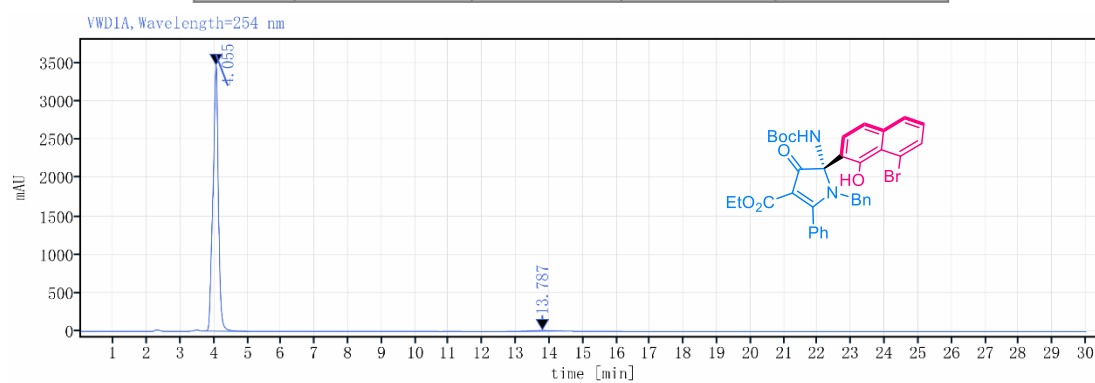

Detector VWD1A, Wavelength=254 nm

| Peak | Ret.Time [min] | Area     | Height  | Area%  |
|------|----------------|----------|---------|--------|
|      | 4.055          | 39118.22 | 3468.19 | 98.93  |
|      | 13.787         | 423.69   | 9.29    | 1.07   |
|      |                | 39541.91 |         | 100.00 |

<sup>1</sup>H NMR (400 MHz, CDCl<sub>3</sub>) of **3an**

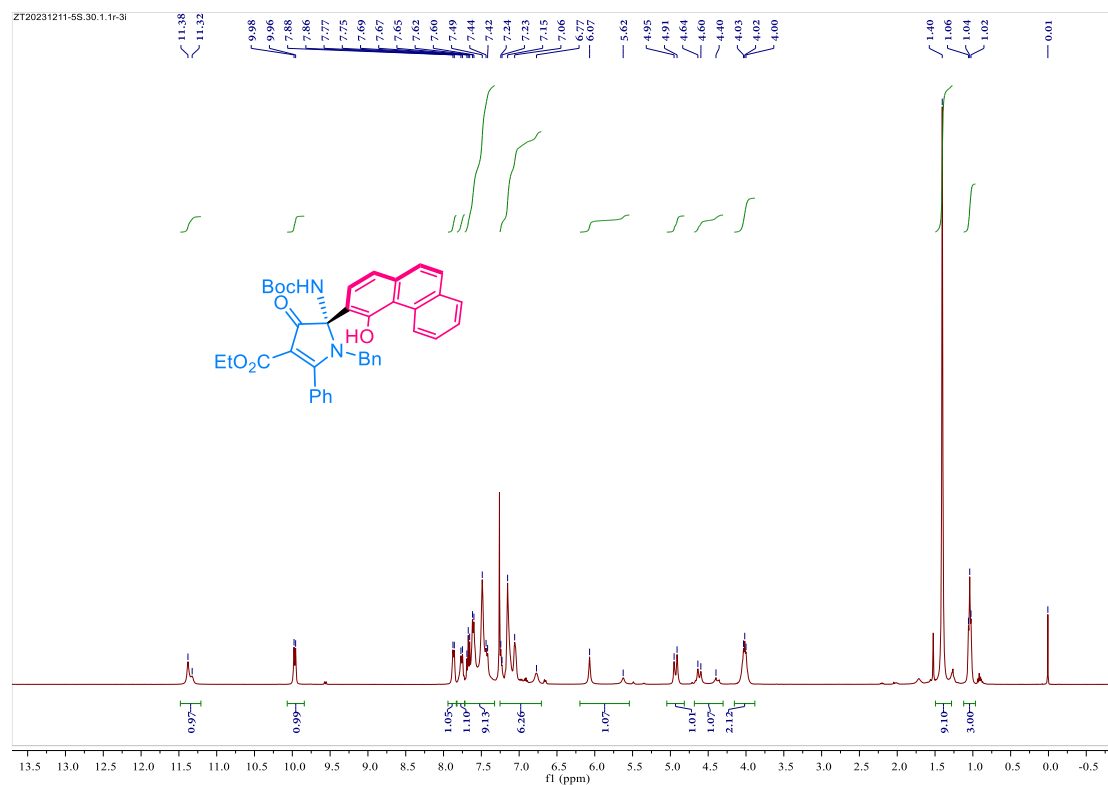

<sup>13</sup>C NMR (101 MHz, CDCl<sub>3</sub>) of **3an**

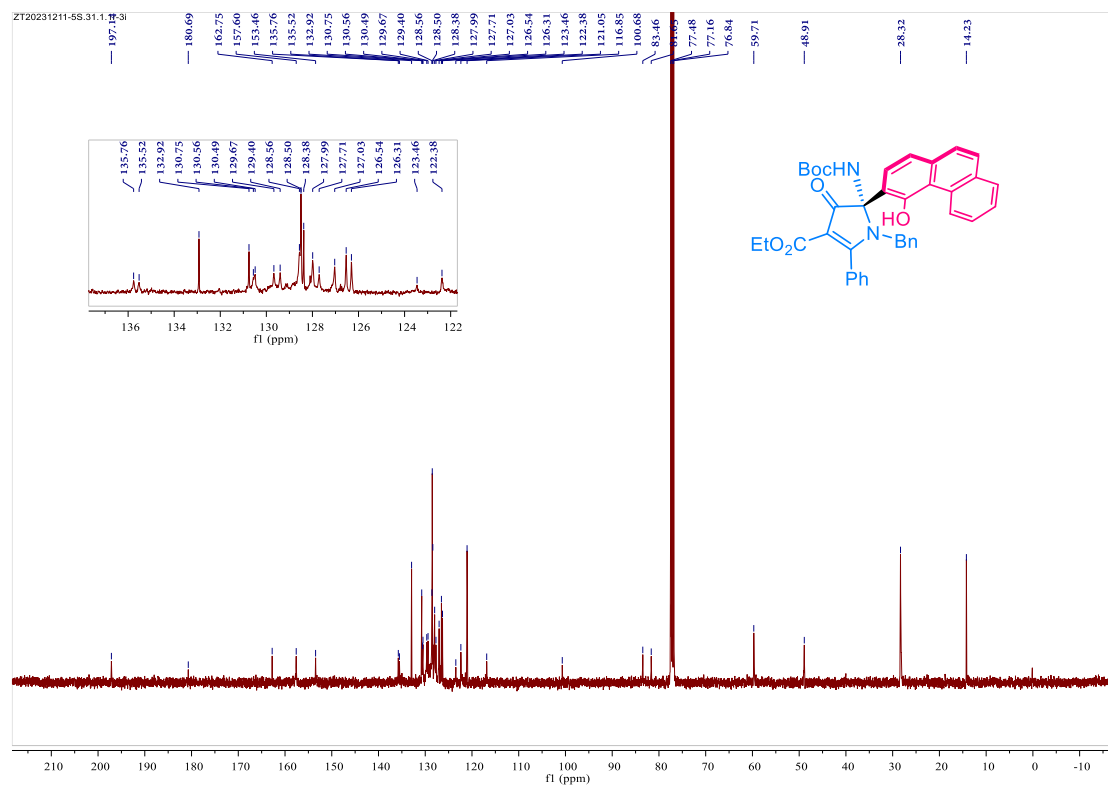



## HPLC spectra of 3an

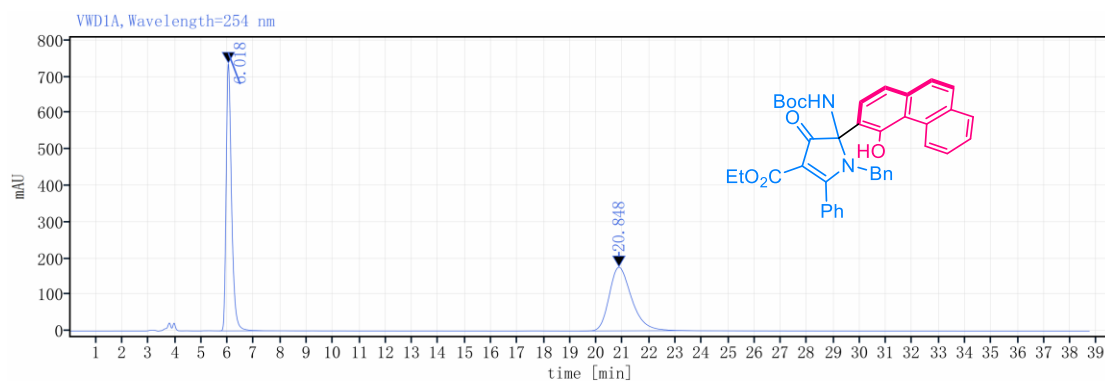

Detector VWD1A, Wavelength=254 nm

| Peak | Ret.Time [min] | Area     | Height | Area%  |
|------|----------------|----------|--------|--------|
|      | 6.018          | 10536.55 | 736.77 | 50.33  |
|      | 20.848         | 10397.37 | 175.49 | 49.67  |
|      |                | 20933.91 |        | 100.00 |

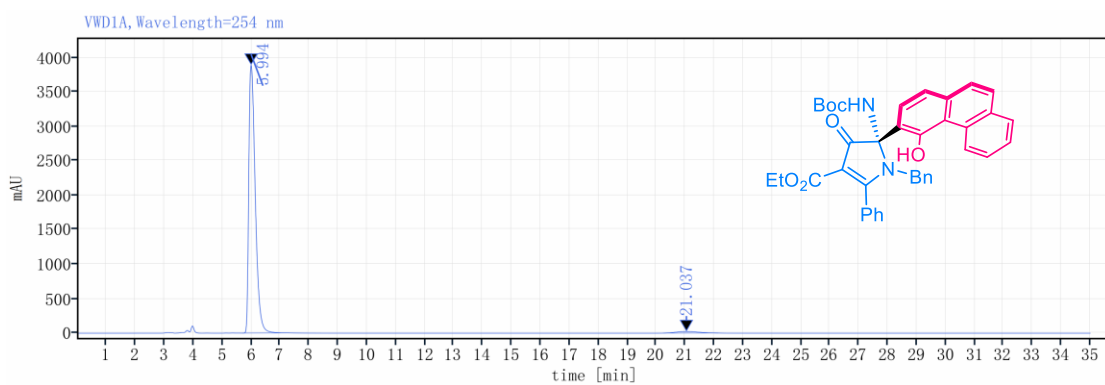

Detector VWD1A, Wavelength=254 nm

| Peak | Ret.Time [min] | Area     | Height  | Area%  |
|------|----------------|----------|---------|--------|
|      | 5.994          | 60372.05 | 3891.83 | 97.95  |
|      | 21.037         | 1262.14  | 23.37   | 2.05   |
|      |                | 61634.19 |         | 100.00 |

### <sup>1</sup>H NMR (400 MHz, CDCl<sub>3</sub>) of 3ao

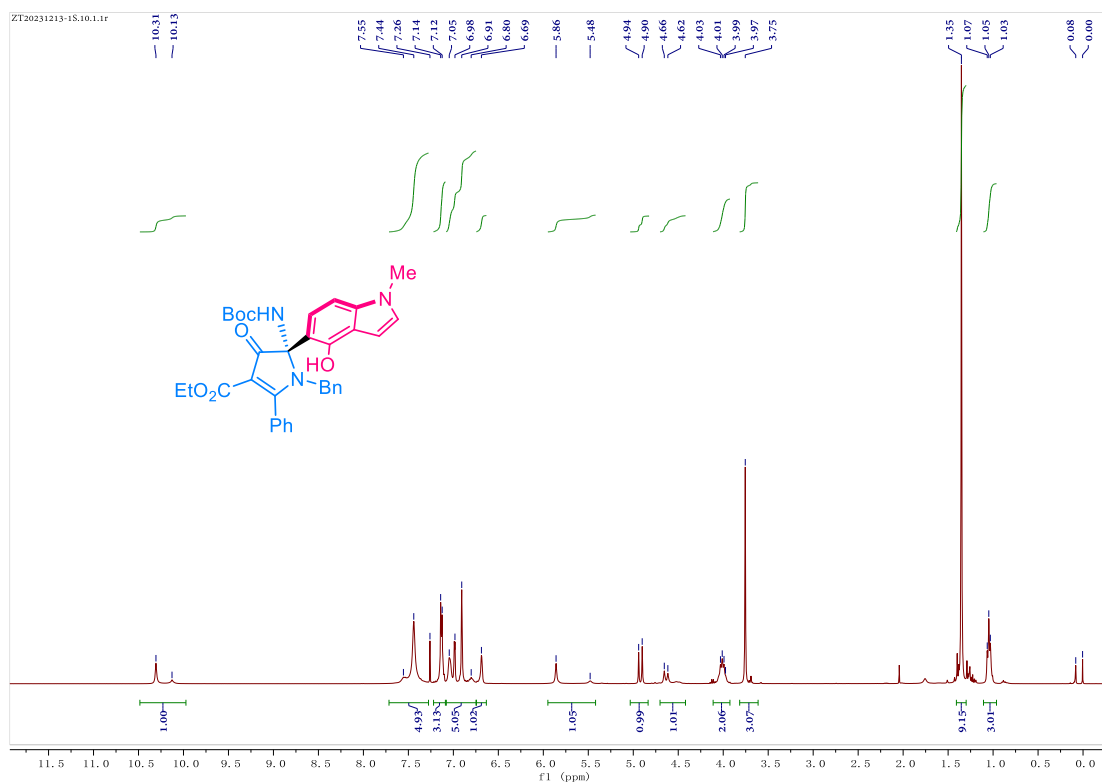

### <sup>13</sup>C NMR (101 MHz, CDCl<sub>3</sub>) of 3ao

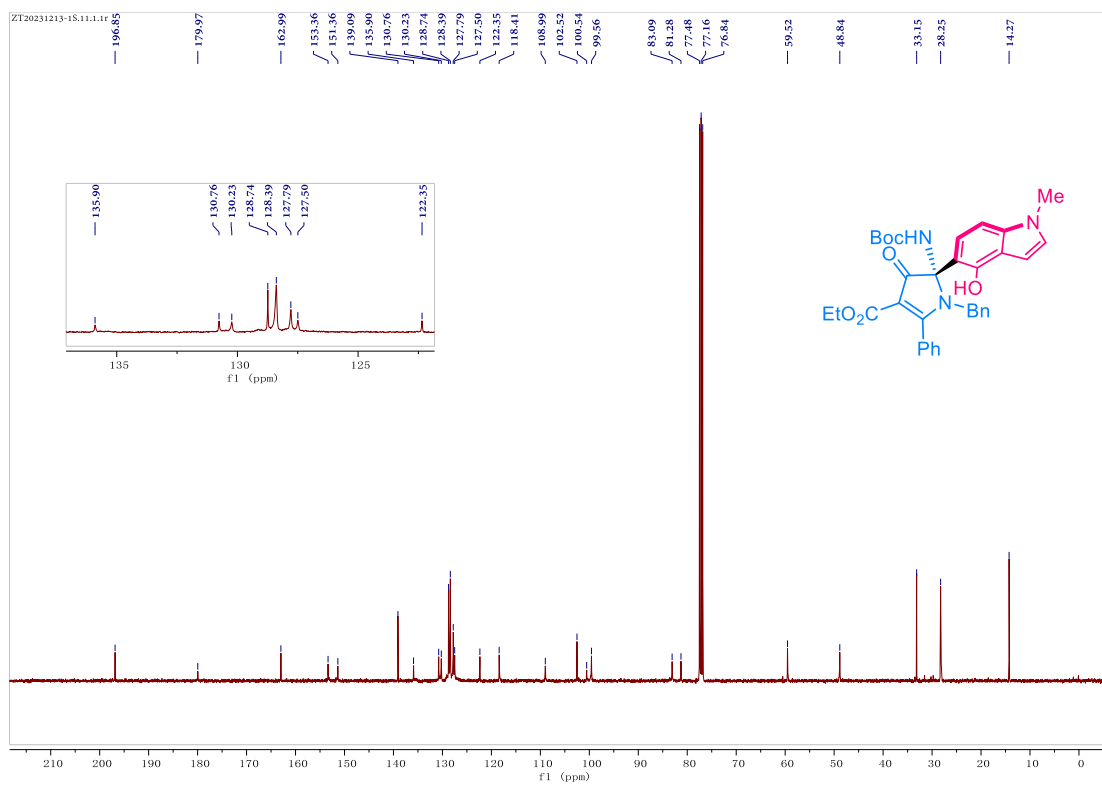

## HPLC spectra of **3ao**

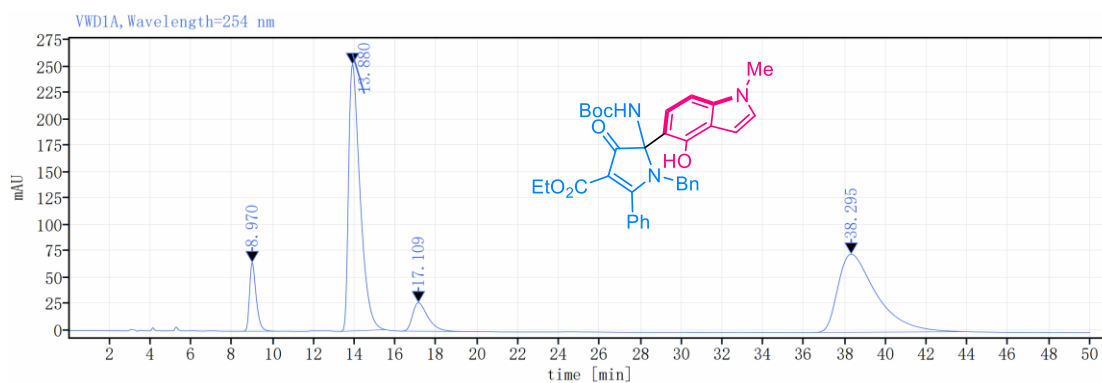

Detector VWD1A, Wavelength=254 nm

| Peak | Ret. Time [min] | Area     | Height | Area%  |
|------|-----------------|----------|--------|--------|
|      | 8.970           | 1477.67  | 65.06  | 6.58   |
|      | 13.880          | 9877.63  | 252.70 | 43.99  |
|      | 17.109          | 1418.11  | 27.07  | 6.32   |
|      | 38.295          | 9679.46  | 74.06  | 43.11  |
|      |                 | 22452.87 |        | 100.00 |

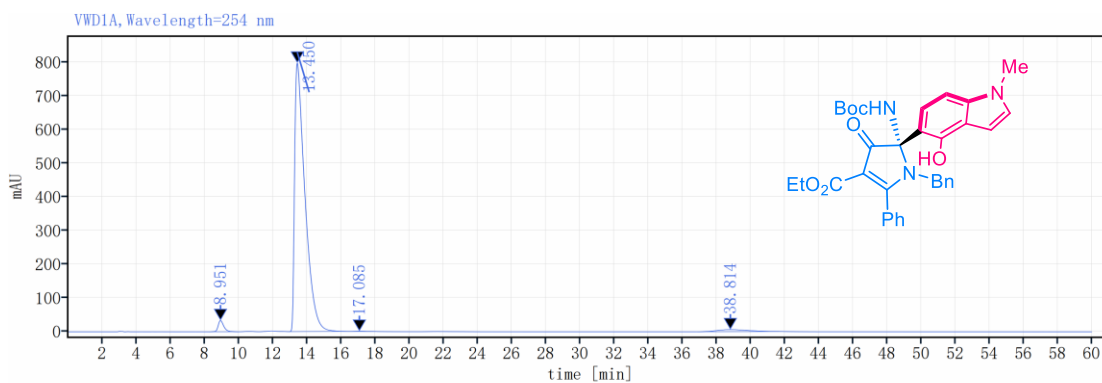

Detector VWD1A, Wavelength=254 nm

| Peak | Ret. Time [min] | Area     | Height | Area%  |
|------|-----------------|----------|--------|--------|
|      | 8.951           | 756.46   | 33.44  | 2.15   |
|      | 13.450          | 33593.26 | 797.08 | 95.57  |
|      | 17.085          | 33.56    | 0.76   | 0.10   |
|      | 38.814          | 768.25   | 6.05   | 2.19   |
|      |                 | 35151.53 |        | 100.00 |

<sup>1</sup>H NMR (400 MHz, CDCl<sub>3</sub>) of **3ap**

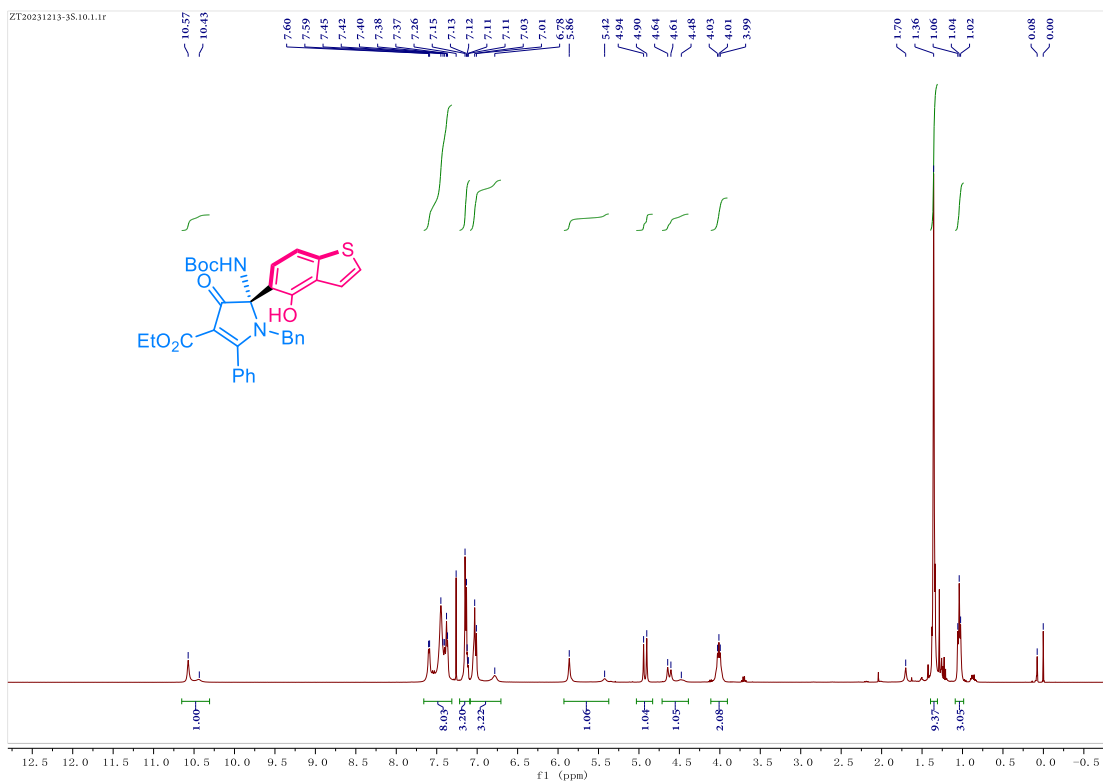

<sup>13</sup>C NMR (101 MHz, CDCl<sub>3</sub>) of **3ap**

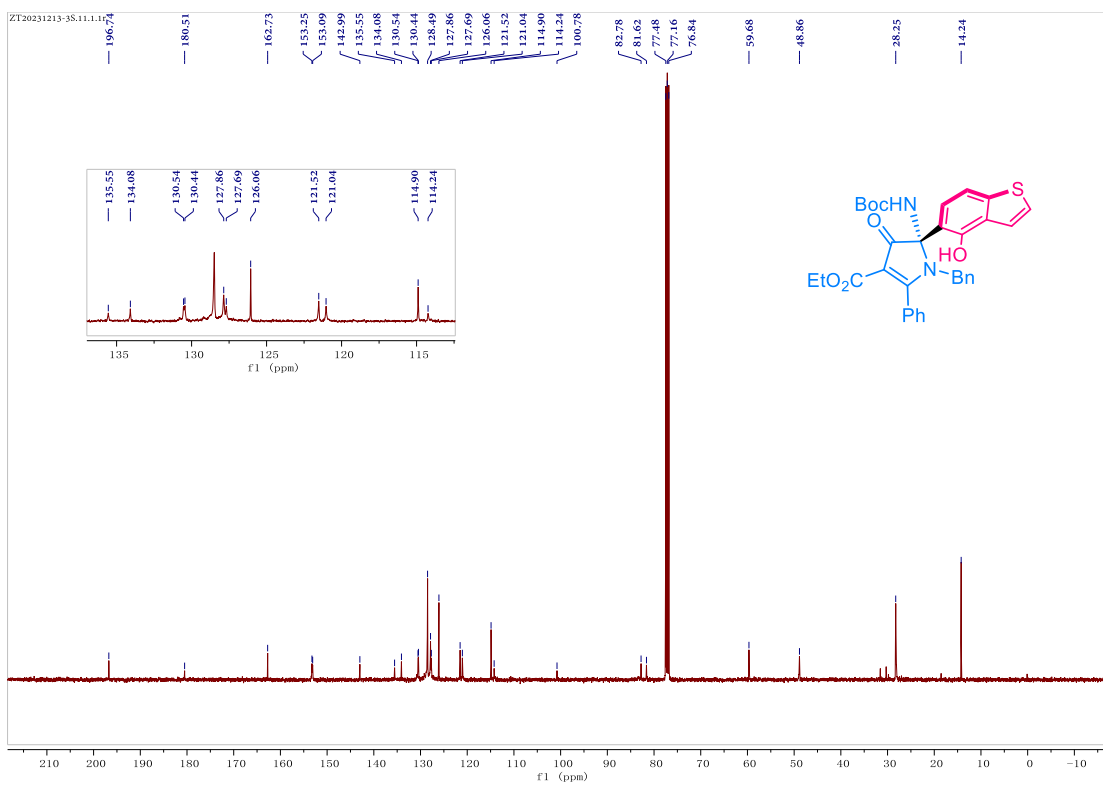

## HPLC spectra of 3ap

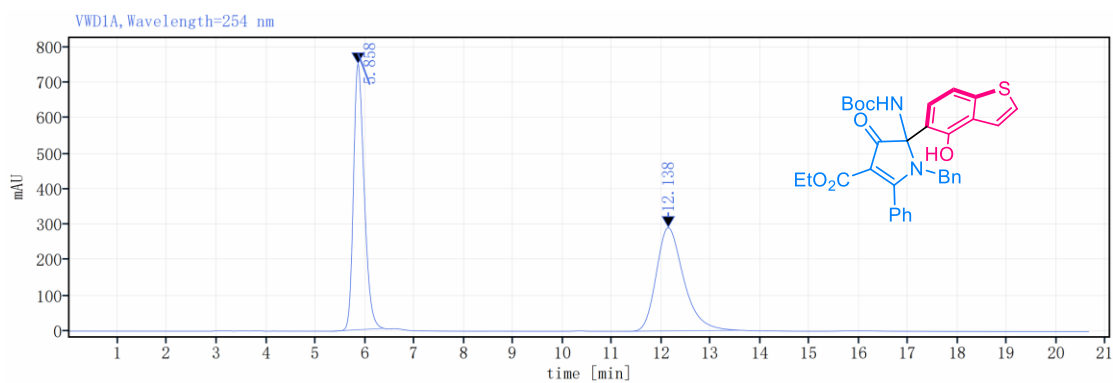

Detector VWD1A, Wavelength=254 nm

| Peak | Ret. Time [min] | Area     | Height | Area%  |
|------|-----------------|----------|--------|--------|
|      | 5.858           | 11237.12 | 748.93 | 50.12  |
|      | 12.138          | 11185.12 | 290.86 | 49.88  |
|      |                 | 22422.24 |        | 100.00 |

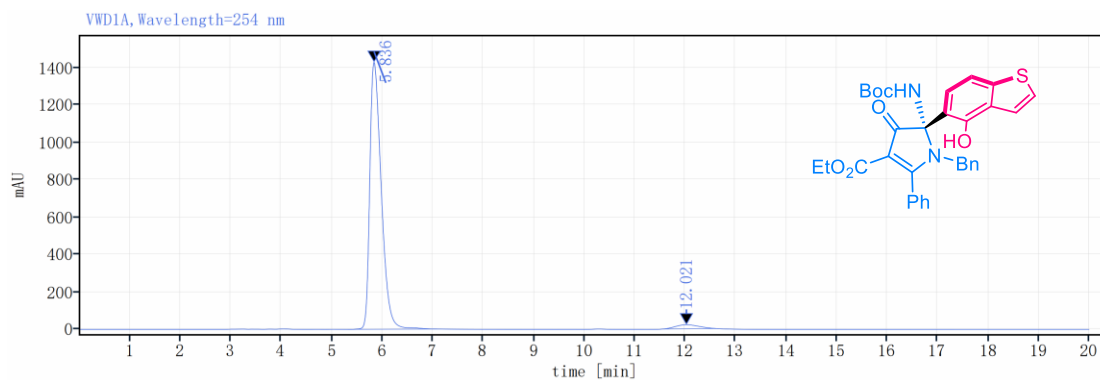

Detector VWD1A, Wavelength=254 nm

| Peak | Ret. Time [min] | Area     | Height  | Area%  |
|------|-----------------|----------|---------|--------|
|      | 5.836           | 22582.28 | 1431.38 | 97.00  |
|      | 12.021          | 699.11   | 21.69   | 3.00   |
|      |                 | 23281.39 |         | 100.00 |

<sup>1</sup>H NMR (400 MHz, CDCl<sub>3</sub>) of **3aq**

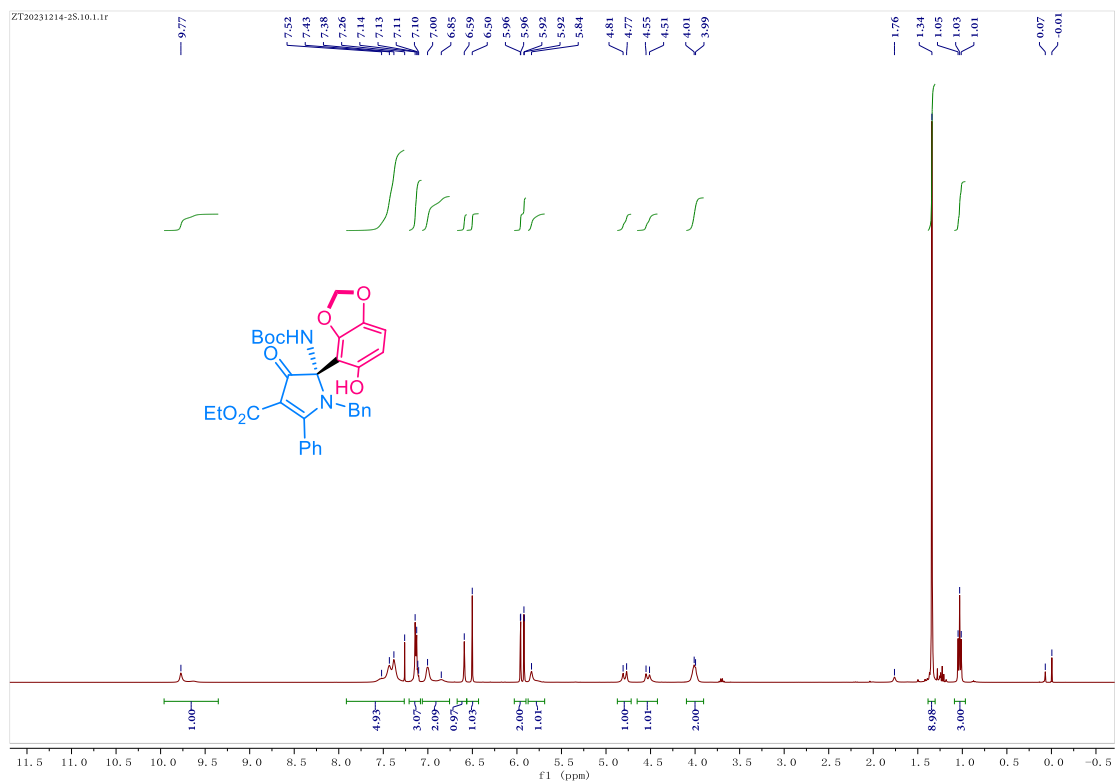

<sup>13</sup>C NMR (101 MHz, CDCl<sub>3</sub>) of **3aq**

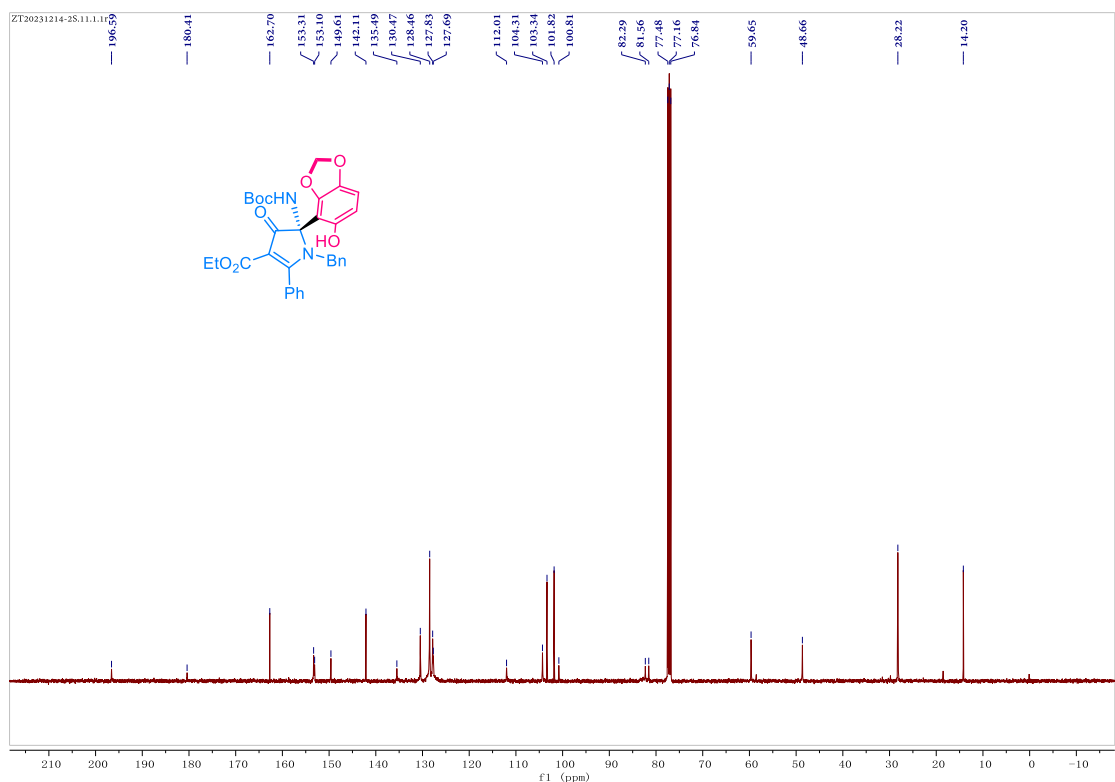

### HPLC spectra of 3a<sub>q</sub>

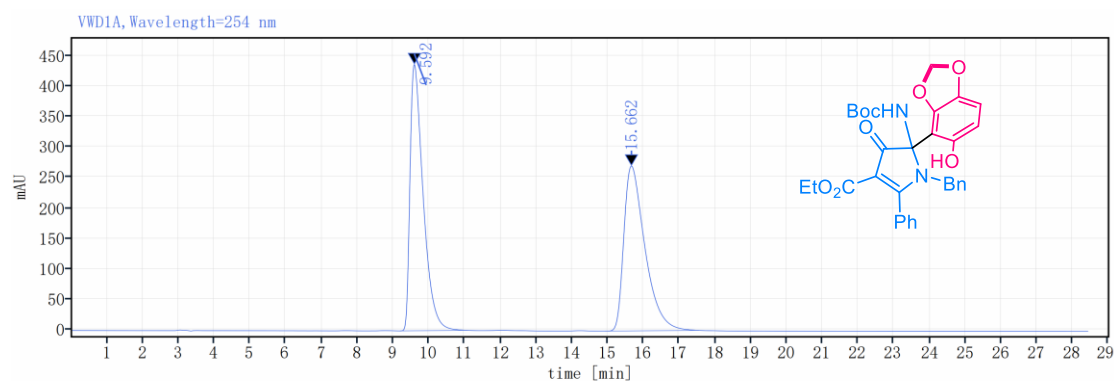

Detector VWD1A, Wavelength=254 nm

| Peak | Ret.Time [min] | Area     | Height | Area%  |
|------|----------------|----------|--------|--------|
|      | 9.592          | 11127.59 | 435.76 | 50.16  |
|      | 15.662         | 11056.43 | 269.89 | 49.84  |
|      |                | 22184.02 |        | 100.00 |

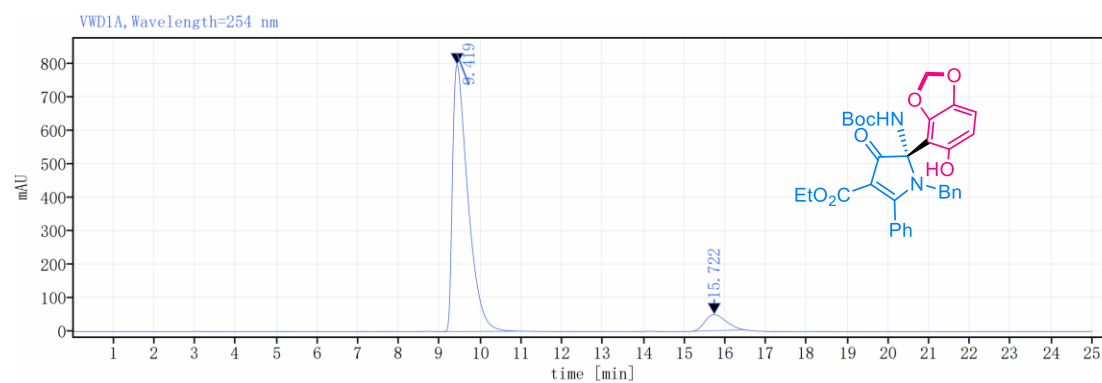

Detector VWD1A, Wavelength=254 nm

| Peak | Ret.Time [min] | Area     | Height | Area%  |
|------|----------------|----------|--------|--------|
|      | 9.419          | 20776.71 | 796.52 | 92.32  |
|      | 15.722         | 1727.57  | 48.20  | 7.68   |
|      |                | 22504.28 |        | 100.00 |

<sup>1</sup>H NMR (400 MHz, CDCl<sub>3</sub>) of 4

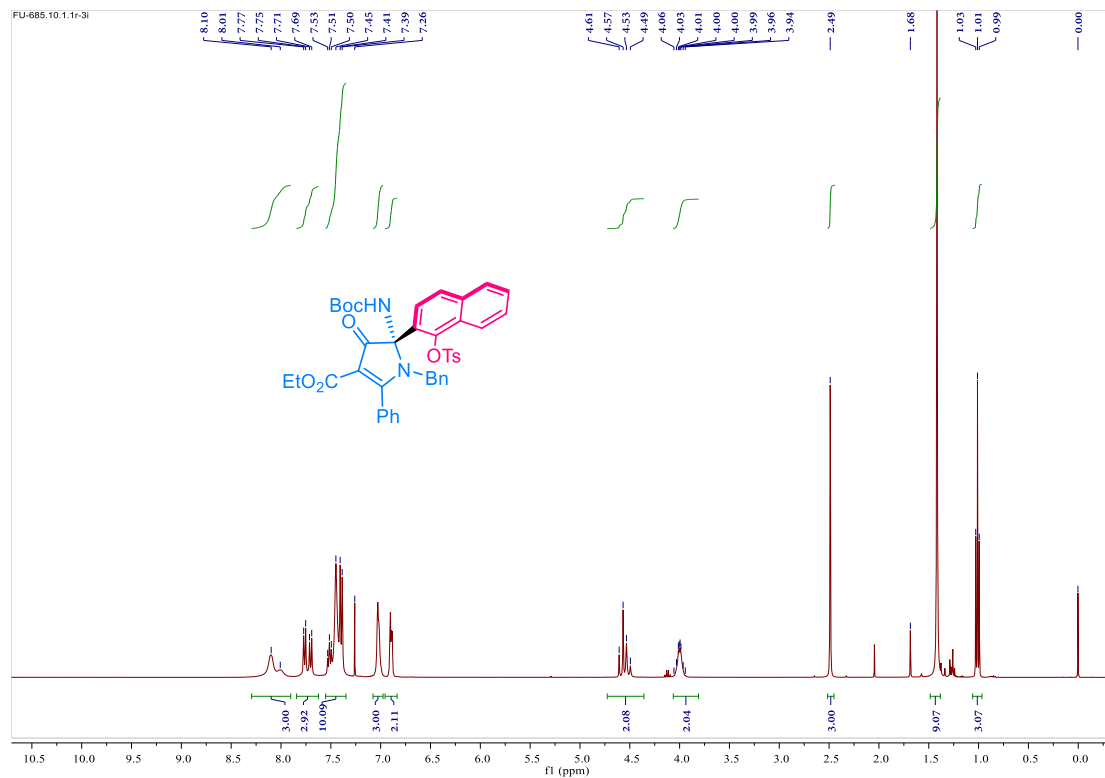

<sup>13</sup>C NMR (101 MHz, CDCl<sub>3</sub>) of 4

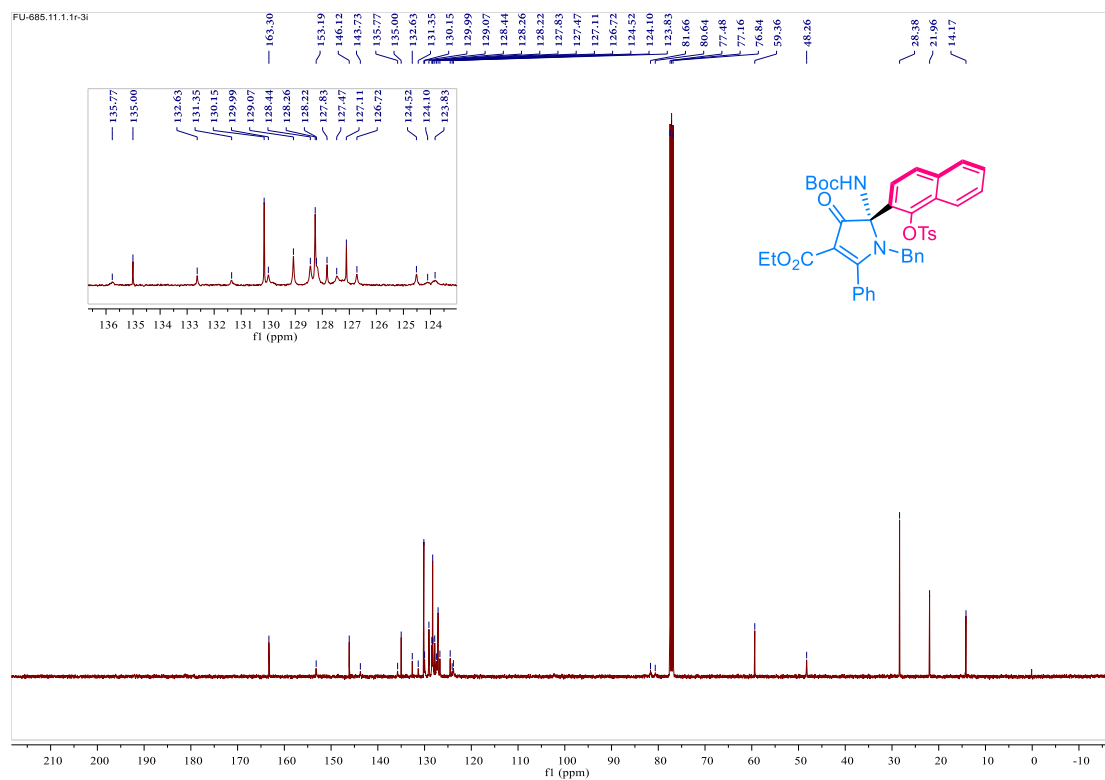



## HPLC spectra of 4

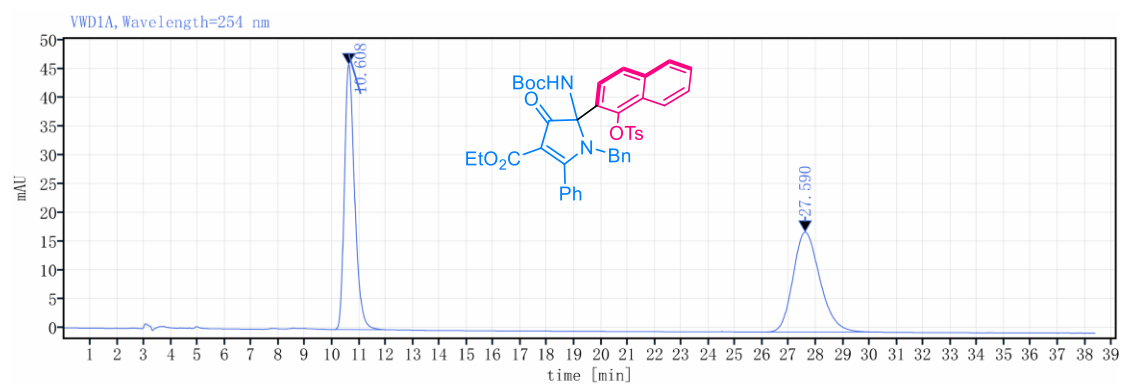

Detector VWD1A, Wavelength=254 nm

| Peak | Ret. Time [min] | Area    | Height | Area%  |
|------|-----------------|---------|--------|--------|
|      | 10.608          | 1216.79 | 46.14  | 50.10  |
|      | 27.590          | 1211.82 | 17.41  | 49.90  |
|      |                 | 2428.61 |        | 100.00 |

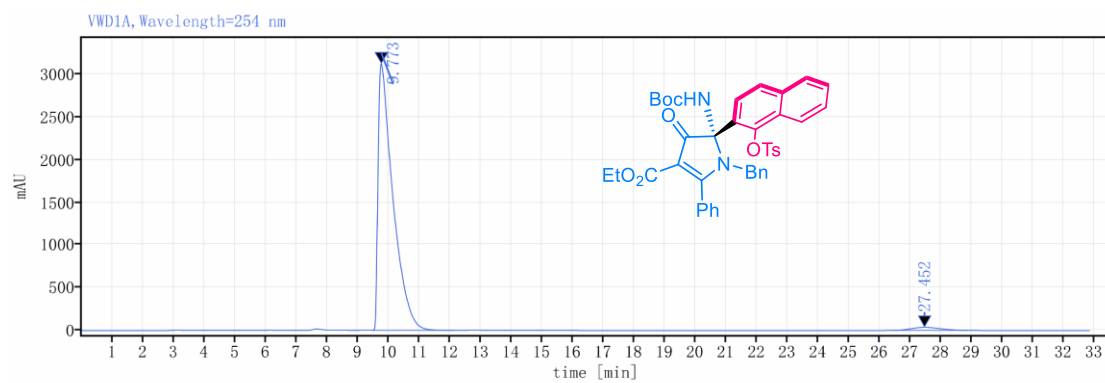

Detector VWD1A, Wavelength=254 nm

| Peak | Ret. Time [min] | Area      | Height  | Area%  |
|------|-----------------|-----------|---------|--------|
|      | 9.773           | 104756.40 | 3123.47 | 97.78  |
|      | 27.452          | 2379.53   | 36.38   | 2.22   |
|      |                 | 107135.93 |         | 100.00 |

### <sup>1</sup>H NMR (400 MHz, CDCl<sub>3</sub>) of **5**

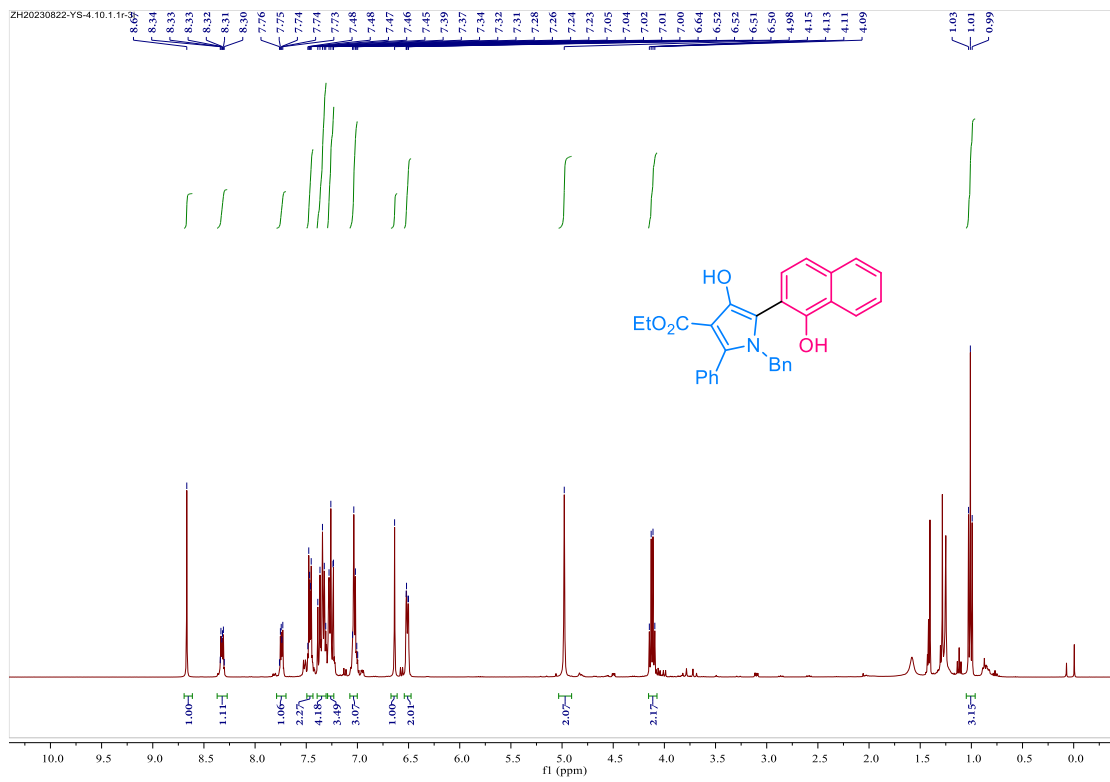

### <sup>13</sup>C NMR (101 MHz, CDCl<sub>3</sub>) of **5**

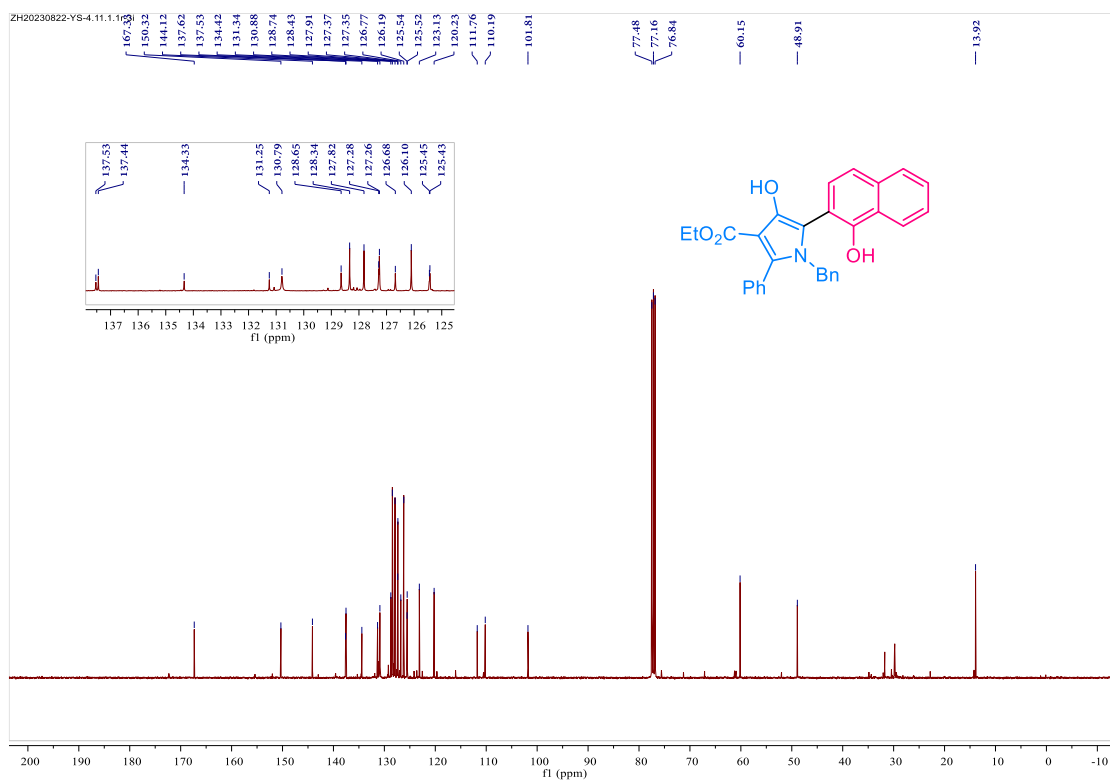



## HPLC spectra of 6

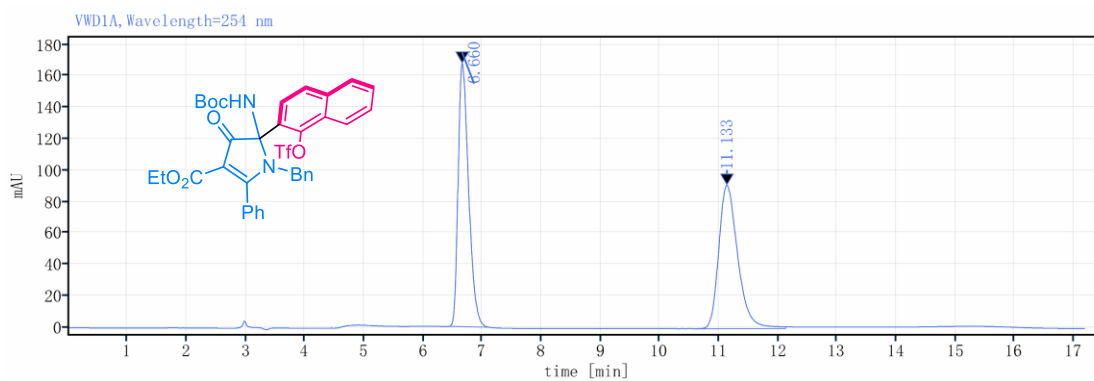

Detector VWD1A, Wavelength=254 nm

| Peak | Ret.Time [min] | Area    | Height | Area%  |
|------|----------------|---------|--------|--------|
|      | 6.660          | 2058.30 | 167.61 | 50.30  |
|      | 11.133         | 2033.58 | 91.25  | 49.70  |
|      |                | 4091.88 |        | 100.00 |

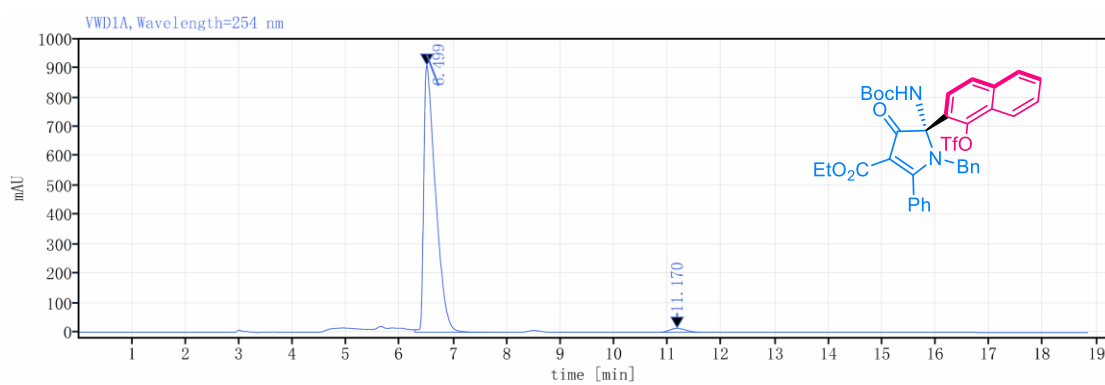

Detector VWD1A, Wavelength=254 nm

| Peak | Ret.Time [min] | Area     | Height | Area%  |
|------|----------------|----------|--------|--------|
|      | 6.499          | 13934.16 | 909.75 | 97.99  |
|      | 11.170         | 286.27   | 13.81  | 2.01   |
|      |                | 14220.43 |        | 100.00 |
